# Supplementary material for: ‘Have you seen what is on Facebook?’ The use of social networking software by healthcare professions students
Source: PubMed Central journal article supplement — BMJ Open. 2013 Jul 23;3(7):e003013. doi: 10.1136/bmjopen-2013-003013 (PMC3731743; doi:10.1136/bmjopen-2013-003013), 2013-07-23
Supplement: bmjopen-2013-003013.draft_revisions.pdf [file bmjopen-2013-003013.draft_revisions.pdf]

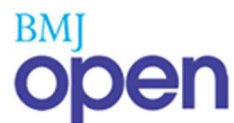

**"Have you seen what's on Facebook?" The use of social networking software by healthcare professions students.**

|                                 |                                                                                                                                                                                                                                                                        |
|---------------------------------|------------------------------------------------------------------------------------------------------------------------------------------------------------------------------------------------------------------------------------------------------------------------|
| Journal:                        | <i>BMJ Open</i>                                                                                                                                                                                                                                                        |
| Manuscript ID:                  | bmjopen-2013-003013                                                                                                                                                                                                                                                    |
| Article Type:                   | Research                                                                                                                                                                                                                                                               |
| Date Submitted by the Author:   | 07-Apr-2013                                                                                                                                                                                                                                                            |
| Complete List of Authors:       | White, Jonathan; University of Alberta, Surgery<br>Kirwan, Paul; University of Alberta, Surgery<br>Lai, Krista; University of Alberta, Family Medicine<br>Walton, Jennifer; University of Alberta, Pediatrics<br>Ross, Shelley; University of Alberta, Family Medicine |
| <b>Primary Subject Heading</b>: | Medical education and training                                                                                                                                                                                                                                         |
| Secondary Subject Heading:      | Medical education and training                                                                                                                                                                                                                                         |
| Keywords:                       | Information technology < BIOTECHNOLOGY & BIOINFORMATICS, World Wide Web technology < BIOTECHNOLOGY & BIOINFORMATICS, Information management < BIOTECHNOLOGY & BIOINFORMATICS                                                                                           |
|                                 |                                                                                                                                                                                                                                                                        |

SCHOLARONE™  
Manuscripts

**Title**

“Have you seen what’s on Facebook?” The use of social networking software by healthcare professions students

---

**Authors**

J White, P Kirwan, K Lai, J Walton, S Ross.

**Affiliations**

J White, Associate Professor, Department of Surgery, University of Alberta.

P Kirwan, Research Assistant, Department of Surgery, University of Alberta.

K Lai, Medical Student, Department of Family Medicine, University of Alberta.

J Walton, Assistant Professor, Department of Pediatrics, University of Alberta.

S Ross, Assistant Professor, Department of Family Medicine, University of Alberta.

**Corresponding Author****Dr Jonathan White**

Address: Room 202 Community Services Centre, Royal Alexandra Hospital,  
10240 Kingsway Avenue, Edmonton AB T5H 3V9, Canada

Email: [jswhite1@ualberta.ca](mailto:jswhite1@ualberta.ca)

Phone: (780) 735-5147

Fax: (780) 735-5459

### Competing Interest Declaration

"All authors have completed the Unified Competing Interest form at [www.icmje.org/coi\\_disclosure.pdf](http://www.icmje.org/coi_disclosure.pdf) (available on request from the corresponding author) and declare that (1) [initials of relevant authors] have support from [name of company] for the submitted work; (2) [initials of relevant authors] have [no or specified] relationships with [name of companies] that might have an interest in the submitted work in the previous 3 years; (3) their spouses, partners, or children have [specified] financial relationships that may be relevant to the submitted work; and (4) [initials of relevant authors] have no [or specified] non-financial interests that may be relevant to the submitted work."

### Exclusive Licence Statement

"The Corresponding Author has the right to grant on behalf of all authors and does grant on behalf of all authors, an exclusive licence (or non exclusive for government employees) on a worldwide basis to the BMJ Publishing Group Ltd and its Licensees to permit this article (if accepted) to be published in BMJ editions and any other BMJPL products and sublicences to exploit all subsidiary rights, as set out in our licence ( <http://resources.bmj.com/bmj/authors/checklists-forms/licence-for-publication>)."

### Contributorship statement

All authors are justifiably credited with authorship, according to the authorship criteria. In detail:  
Jonathan White: study conception and design, analysis and interpretation of data, revising the article, final approval of the version to be published  
Paul Kirwan Wallace: data collection, analysis and interpretation of data, interviewer, input to drafts of the article, final approval of the version to be published  
Krista Lai: analysis and interpretation of data, input to drafts of the article, final approval of the version to be published  
Jennifer Walton: analysis and interpretation of data, input to drafts of the article, final approval of the version to be published  
Shelley Ross: study conception and design, analysis and interpretation of data, revising the article, final approval of the version to be published

### Acknowledgements

Funding for this project was provided University of Alberta Faculty of Medicine and Dentistry summer studentships in 2011 and 2012. We would like to acknowledge the assistance of Ms Shannon Erichsen with this project.

### Ethical Approval

Ethics approval was obtained from the University of Alberta Health Research Ethics Board (ref: 22787).

### Data sharing

Requests for original data should be directed to the corresponding author. Data sharing is governed by our local ethics board.

**ABSTRACT (316 words)**

**Objective.** The use of social networking software has become ubiquitous in our society. The aim of this study was to explore the attitudes and experiences of healthcare professional students using Facebook at our school, and to determine if there is a need for development of policy to assist students with utilizing this technology during their professional education.

**Design.** A mixed-methods approach was employed, using semi-structured interviews to identify important themes which were further explored using an online survey. A combination of descriptive statistics and thematic analysis was used to analyse the data obtained.

**Setting & Participants:** Students of Medicine, Nursing, Pharmacy, Speech & Language Pathology, Occupational Therapy, Physical Therapy, Dentistry, Dental Hygiene and Medical Laboratory Science at a large North American university.

**Results.** 14 interviews were analysed in-depth, and 682 healthcare professions students responded to the survey. 93% reported current Facebook use. Themes identified included: patterns of use and attitudes to friendship, attitudes to online privacy, breaches of professional behaviour on Facebook, and attitudes to guidelines relating to Facebook use. A majority considered posting of the following material unprofessional: use of alcohol and drugs, crime, obscenity, patient/client information, sexual content and nudity and criticism of others. 44% reported seeing such material posted by a colleague, and 27% reported posting such material themselves. A majority

1  
2  
3 of participants agreed that guidelines for Facebook use would be beneficial.  
4  
5

6 **Conclusions.** This study demonstrates that the use of social networking software is  
7  
8 widespread amongst healthcare students at our school, and highlights the challenges  
9  
10 which accompany the use of this new technology. We believe that studies such as this  
11  
12 are important in understanding the pedagogy and practices of Facebook use and in  
13  
14 helping students navigate the dilemmas associated with becoming 21<sup>st</sup> century  
15  
16 healthcare professionals.  
17  
18  
19  
20  
21  
22  
23  
24  
25  
26  
27  
28  
29  
30  
31  
32  
33  
34  
35  
36  
37  
38  
39  
40  
41  
42  
43  
44  
45  
46  
47  
48  
49  
50  
51  
52  
53  
54  
55  
56  
57  
58  
59  
60

### *Article focus*

The use of social networking software has become ubiquitous in our society. Healthcare practitioners and their students have struggled to integrate this new technology with the expectations of professional behaviour.

### *Key messages*

- Social networking software is widespread amongst healthcare students at our school. This paper highlights the challenges which accompany the use of this new technology, including the posting of unprofessional and inappropriate material online.
- We discuss the dilemma of students wanting to share information in a mixed social network in order to remain popular, while also being wary about how material shared will make them appear.
- We suggest that guidelines for the use of social networking software may help our students deal with this dilemma more effectively.

### *Strengths and limitations of this study*

Although this study had a relatively low response rate and is possibly subject to response bias, we believe we have shown that use of Facebook is widespread among healthcare students, and that we have identified important areas for education policymakers to focus on.

## INTRODUCTION

In recent years, the use of social networking websites such as Facebook, MySpace and Twitter has become ubiquitous in our society. At the time of writing, there are over 18.5 million Facebook users in Canada alone, and over 70% of the Canadian population possesses a Facebook account [1]. Facebook use is highly prevalent among medical students: at least 60% of medical students in the US, and over 70% of medical students in the UK are active users [2].

A number of authors have written that social networking software has the potential to revolutionize healthcare by increasing interaction between providers and clients and facilitating the free flow of information relating to healthcare [3]. A recent study among primary care physicians and oncologists demonstrated that a majority of those studied used social networking software to keep abreast of new developments in their field and to share knowledge [4]. A recent series of articles has called for surgeons to embrace social media as well [5].

Other authors have called for caution in healthcare providers engaging with social networking software. The software encourages users to share the events of their lives; for individuals training to enter the health professions, such sharing may be in conflict with requirements for confidentiality and professionalism of the profession for which they are training [6]. Some have suggested that Facebook will lead to an unacceptable blurring of the professional and the personal, and make it difficult to maintain proper

1  
2  
3 boundaries and professional principles [7,8]. Other authors have gone further and  
4 suggested that it may be best for healthcare providers not to engage in social  
5 networking online [9], or that Facebook use should be monitored or policed in some way  
6 [10,11].  
7  
8  
9  
10  
11

12  
13  
14  
15 This study grew out of a discussion within our medical school about our own students'  
16 use of Facebook, based on a number of incidents in which we thought our students  
17 could have used Facebook more appropriately. This led to a debate about how (or  
18 indeed if) we should advise our students about using such social networking software.  
19 We decided to focus on Facebook use instead of Twitter or MySpace, as this has been  
20 shown to be the most widely-adopted form of social networking software at the moment  
21 [2,5,12,13]. Most other studies on online social networking in healthcare education have  
22 focused on medical students, but we decided to sample a larger population to obtain a  
23 broad snapshot of the use of Facebook in all of our healthcare faculties at our school.  
24  
25  
26  
27  
28  
29  
30  
31  
32  
33  
34  
35  
36  
37  
38

39 The aim of this study was to explore the attitudes and experiences of healthcare  
40 professional students using Facebook at our university, with the aim of determining if  
41 there is a need for development of policy or guidelines to assist students with integrating  
42 this new technology as they progress in their education.  
43  
44  
45  
46  
47  
48  
49  
50  
51  
52  
53  
54  
55  
56  
57  
58  
59  
60



## METHODS

We employed a mixed-methods approach, conducting interviews with a small number of healthcare professions students first to identify important themes related to the use of social networking software, and then developing an online survey which was administered to a larger group.

Semi-structured interviews were conducted with 14 healthcare professions students at our university about participants' current use of social networking services. Interview questions were developed by the authors after a review of the literature. Convenience sampling was used: participants were contacted through email, inviting voluntary participation in an interview. Students in nursing, medicine, dentistry, pharmacy, dental hygiene, speech and language pathology, occupational therapy and physical therapy were included in the invitation email distribution list and a single reminder email was sent. There were no specific exclusion criteria. Consent was obtained in person by the interviewer. Interviews lasted 30-45 minutes, and were designed to elicit information about participants' current use of social networking software. Interviews were audio-recorded and transcribed by a research assistant; transcripts were then analyzed to identify common themes.

Themes identified from interview data were used to construct an anonymous online survey. Items included a range of single-best-choice, Likert-scale, ranking and free response items. All items were revised by testing with health professions students

1  
2  
3 before the survey was distributed. Convenience sampling was again employed, and the  
4  
5 survey was distributed by email to students in all of the healthcare professions listed  
6  
7 above. Participants were contacted through email, inviting voluntary participation in the  
8  
9 survey; participants who had been interviewed were free to respond to the survey too.  
10  
11 Descriptive statistics were used to describe responses to each question. Free-text  
12  
13 responses were analyzed to identify common themes and representative quotations.  
14  
15 This study reports our findings relating to students' use of Facebook, unprofessional  
16  
17 behaviours observed online, and about the need for guidelines relating to social  
18  
19 networking software for healthcare professionals. Ethics approval was obtained from the  
20  
21 local Health Research Ethics Board.  
22  
23  
24  
25  
26  
27  
28

## 29 **RESULTS**

30  
31 The study took place in fall 2011. We identified the following themes at interview:  
32  
33 patterns of Facebook use, attitudes to friendship on Facebook, attitudes to online  
34  
35 privacy, breaches of professional behaviour on Facebook (including use of alcohol and  
36  
37 drugs, crime, obscenity, patient/client information, sexual content and nudity, criticism of  
38  
39 others) and attitudes to guidelines relating to Facebook use.  
40  
41  
42  
43  
44  
45

46 A total of 682 students responded to the survey, a response rate of approximately 17%  
47  
48 (estimated total number of students: 3984). The number of students from each faculty  
49  
50 was as follows: Medicine: 232, Nursing: 200, Pharmacy: 82, Speech & Language  
51  
52 Pathology: 54, Occupational Therapy: 43, Physical Therapy: 24, Dentistry/Dental  
53  
54 Hygiene 23, Medical Laboratory Science: 23. Over 75% of respondents were aged 18-  
55  
56  
57  
58  
59  
60

1  
2  
3 25, and the gender balance was 3.2:1 (521 females: 158 males). In the following  
4  
5 section, quotations from free-response items are presented to highlight particular  
6  
7 themes identified, while percentages in brackets are used to indicate the proportion of  
8  
9 respondents to the online survey who expressed agreement with a particular theme or  
10  
11 statement observed. Additional representative quotations are presented in Table 1.  
12  
13

14  
15  
16  
17 93% of respondents reported having a Facebook account; 76% described checking  
18  
19 their account at least 2 times per day, with 39% checking at least 5 times a day. When  
20  
21 asked "who is on your friend list?", respondents indicated the following categories: other  
22  
23 students 96%, previous work colleagues 73%, current work colleagues 44%, previous  
24  
25 instructors 21%, current instructors 5%, previous patients/clients 2%, current  
26  
27 patients/clients 0.3% .  
28  
29  
30  
31

32  
33  
34 Respondents were asked to consider the types of material that they would consider  
35  
36 unprofessional in principle if posted to Facebook (Table 2). 99% of respondents agreed  
37  
38 that it would be unprofessional to post images or text which could be used to identify a  
39  
40 patient. 40% of respondents said it was unprofessional to post anything at all relating to  
41  
42 a patient/client, even without identifying information.  
43  
44  
45

- 46  
47  
48 • *A girl I know openly posts "quotes of the day" from patients she works with in mental*  
49  
50 *health. She does not say who said them, and they are funny, but since I work there*  
51  
52 *too, the info is identifying. I think it crosses a line.*  
53  
54  
55  
56  
57  
58  
59  
60

1  
2  
3 Over 80% considered posts or images relating to the following activities unprofessional:  
4  
5 illicit drug consumption, criminal activity, overt sexual content, partial nudity and  
6  
7  
8 condescending or superior behaviour. At least 50% considered the following  
9  
10 unprofessional: critical comments about a teacher, drunkenness/excessive drinking,  
11  
12 swearing, and obscene gestures. Less than 10% objected to posts or photos depicting  
13  
14 drinking in moderation, and to posting current relationship status.  
15  
16

- 17  
18  
19  
20 • *Plenty of students in my class post pictures of heavy drinking, many swear or have*  
21  
22 *inappropriate sexual innuendo in their status updates.*  
23  
24

25  
26  
27 44% of respondents described seeing unprofessional material which had been posted  
28  
29 to Facebook by a colleague (153 responses). The most common specific examples  
30  
31 given included criticism of teachers and programs (56 instances), inappropriate  
32  
33 photographs (47 instances), depictions of drunkenness (27), posts about patients (21)  
34  
35 and negative comments about patients (13). Other examples included parties attended  
36  
37 (9), swearing (8), references to sex (7), inappropriate posts about work (5), negative  
38  
39 comments about other professions (5) and consumption of illegal drugs (3). There were  
40  
41 also descriptions of errors, negative comments about co-workers, inappropriate  
42  
43 behaviour in uniform, nudity, criminal activity, obscene gestures, racist and sexist  
44  
45 comments and pictures of a cadaver (1-2 of each).  
46  
47  
48  
49

- 50  
51  
52  
53 • *I know a medical student who often posts complaints about her faculty and also*  
54  
55 *personal patient information*  
56  
57  
58  
59  
60

1  
2  
3  
4  
5  
6 27% of respondents admitted to posting material which, with hindsight, they now  
7  
8 considered unprofessional (81 responses). The most common transgressions described  
9  
10 were posting inappropriate pictures (15 instances), swearing (13), criticizing teachers  
11  
12 and programs (9), drinking (9), posting comments open to misinterpretation (8) and  
13  
14 parties (5). There were 3 instances of posting sexual content, 2 posts about patients  
15  
16 and 1 example of expressing negative views about a patient.  
17  
18  
19  
20  
21

- 22 • *I've wrote personal posts before that probably shouldn't have been posted.*  
23  
24  
25  
26

27 44% described having material posted about them which they felt made them look  
28  
29 unprofessional (137 examples). The vast majority of these instances related to the  
30  
31 posting of photographs online (106); the most common areas of concern related to  
32  
33 alcohol consumption (39) and attending parties (15); there were also examples of nudity  
34  
35 (4), sexual material (3) and information pertaining to a relationship (1). 18% of  
36  
37 respondents reported that the posting of such material had made them consider  
38  
39 withdrawing from the use of social networking software.  
40  
41  
42  
43  
44  
45

- 46 • *People have posted hilarious photos from parties and other events some of which*  
47  
48 *depict me as being intoxicated but once again I'm hoping that due to privacy settings*  
49  
50 *the general public cannot see these.*  
51  
52  
53  
54

55 As a group, respondents were ambiguous about posting material on Facebook. Some  
56  
57  
58  
59  
60

1  
2  
3 students considered it intrusive that faculty should even be enquiring about their  
4 Facebook use, as they considered this too personal a topic for discussion. Others  
5 expressed concern that faculty's expectations around their online activities were  
6 unreasonable. Others took the view that they should be able to post what they like as  
7 long as they could control who has access.  
8  
9  
10  
11  
12  
13

- 14  
15  
16  
17  
18 • *Just because we are in a health care profession does not mean that we do not have*  
19 *freedom of speech.*  
20  
21

22  
23  
24 Students expressed the view that posting material to Facebook was associated with  
25 some risk to their current position and future prospects.  
26  
27  
28

- 29  
30  
31  
32 • *I am aware that my behaviour in all domains affects my reputation, so I am*  
33 *careful about who I am seen with and what I do.*  
34  
35

36  
37  
38 Many students described censoring themselves and removing material they had posted  
39 or been tagged in previously, or requesting to have their name removed from photos  
40 posted by other users.  
41  
42  
43

- 44  
45  
46 • *I went through my Facebook photos and took down the photos I had posted with*  
47 *me in party pictures from my first undergrad degree. If I even looked drunk or*  
48 *questionable, or if the party had a funny, (but inappropriate theme) then I took*  
49 *those pictures down as well. I don't generally post a lot of comments, and none*  
50 *that I regret, but a picture is still worth a thousand words.*  
51  
52  
53  
54  
55  
56  
57  
58  
59  
60

1  
2  
3  
4  
5  
6 98% of respondents described having altered the privacy settings of their Facebook  
7  
8 account on at least one occasion; the reasons given for this included protection from  
9  
10 strangers 99%, not trusting Facebook 62%, risk of viewing by potential employers 52%,  
11  
12 advice from peers 30%, and advice from instructors 17%.  
13

- 14  
15  
16  
17  
18 • *I don't really understand the privacy settings, so I just made them strict, just in case.*  
19  
20 • *I don't post anything on Facebook that could compromise me for work in any way.*  
21  
22

23  
24  
25 Lastly, respondents were asked about the use of guidelines relating to the use of social  
26  
27 networking software in health professions education. Many were unfamiliar with existing  
28  
29 guidelines (43%); only 15% agreed that existing guidelines were adequate. A majority  
30  
31 agreed that guidelines would be beneficial: 79% agreed that others would benefit, and  
32  
33 62% stated they would benefit personally.  
34  
35

- 36  
37  
38  
39 • *There are certain guidelines that I think any professional or role model should follow:*  
40  
41 *no photos of inappropriate conduct (nudity, heavy drinking, sexual content, etc),*  
42  
43 *patients/clients should not be added as friends or be able to view photos,*  
44  
45 *confidential information remains confidential.. otherwise, if people are stupid enough*  
46  
47 *to jeopardize their profession by posting something on facebook, they should deal*  
48  
49 *with the consequences (losing a current or potential job, etc)*  
50  
51  
52  
53  
54  
55  
56  
57  
58  
59  
60

## DISCUSSION

This study demonstrates that the use of social networking software is widespread amongst students in the healthcare professions at our university and highlights some of the dilemmas which accompany the use of this new technology.

There was widespread agreement that posting material that can identify a patient/client should be considered unprofessional, as should material relating to drugs, sex, nudity, drunkenness, crime and obscenity. A majority also considered it unprofessional to post critical comments about teachers/programs and posts which could be considered condescending. Despite these stated understandings, nearly half of the students we studied reporting seeing their colleagues posting unprofessional material on Facebook, and over a quarter reported posting such material themselves. There was a wide range of transgressions reported, including criticism of teachers/programs, posting of inappropriate photographs, drunkenness, parties and swearing.

Our findings agree with other recent papers in the field. A study by Giordano & Giordano on healthcare students found that 77% of students used Facebook, and that use was inversely correlated with age [12]. This paper also showed that the main reasons for use were to maintain personal and professional connections, and to obtain up-to-date information. Thompson *et al* examined Facebook use in US medical students and residents, and found that 47% had Facebook accounts, and that only one-third had privacy settings set sufficiently high to prevent public access. A number of accounts



1  
2  
3 contained material relating to substance abuse, sexism, racism, or lack of respect to  
4  
5 patients [14]. A similar study on New Zealand physicians found that 65% had Facebook  
6  
7 accounts, many of which contained public information relating to alcohol consumption,  
8  
9 sexual orientation, and religion [15]. Similar findings have also been observed in US  
10  
11 otolaryngology residents and British medical students [16]. In a recent study, 60% of US  
12  
13 medical schools reported incidents relating to the use of social networking software,  
14  
15 including breaches of patient confidentiality, profanity relating to the school, intoxication  
16  
17 or substance abuse and nudity and sexual relationships. The majority of schools had  
18  
19 issued a warning to the students involved, and a small number had dismissed a student  
20  
21 over the issue [17].  
22  
23  
24  
25  
26  
27  
28

29 Our findings on student attitudes about posting unprofessional material are also  
30  
31 supported by a study which used focus groups to explore the issue among US medical  
32  
33 students [18]. As in our study, students generally agreed that it was unprofessional to  
34  
35 breach patient confidentiality online, but there was less consensus about material  
36  
37 relating to alcohol, drugs, sex and speaking poorly of others. This study also found that  
38  
39 students expressed ambiguity about their use of Facebook, and “viewed online activity  
40  
41 through a lens of personal risk”, considering how what they post could be used to harm  
42  
43 them.  
44  
45  
46  
47  
48  
49

50 The types of material which our students considered problematic are congruent with  
51  
52 other work outside healthcare describing the five main “Facebook Follies” which  
53  
54 employers consider relevant when hiring new employees: negative attitudes to work,  
55  
56  
57  
58  
59  
60

1  
2  
3 profanity, alcohol, drugs, and sexual activity [19]. Students also appear to be aware of  
4  
5 the impact of their online activities, and have identified similar areas that they do not  
6  
7 wish employers to see including drinking and drugs, photographs from parties,  
8  
9 comments from friends, and comments about work [20-22].  
10  
11  
12  
13

14  
15 Christofides *et al* have observed that social networking software encourages people to  
16  
17 disclose more personal information that they would otherwise do in order to remain  
18  
19 popular within a social network, but also generates concern about information control  
20  
21 and privacy [23]. Inappropriate pictures, especially of parties and drinking are a  
22  
23 common cause of concern. As they write:  
24  
25  
26  
27  
28

29 *(Online) identity ... is a social product created not only by what you share, but also by*  
30  
31 *what others share and say about you... the people who are most popular are those*  
32  
33 *whose identity construction is most actively participated in by others... (by) limiting*  
34  
35 *access to personal information... the individual also... potentially reduces his or her*  
36  
37 *popularity. [23]*  
38  
39  
40  
41  
42

43 We hypothesize that students are faced with a difficult dilemma: wanting to share  
44  
45 information in a mixed personal/professional social network in order to remain popular,  
46  
47 while also being wary about how the material they share will make them appear and  
48  
49 who will see it. Others have also described this 'balancing act' between the need to  
50  
51 share information and the desire to manage how one's self is presented [24]. This is a  
52  
53 process of trial and error, and students express regret for the negative consequences of  
54  
55  
56  
57  
58  
59  
60

1  
2  
3 material posted previously [25]. We believe that this process is similar to other  
4  
5 processes of conforming in healthcare education which have been described elsewhere  
6  
7 [26].  
8  
9

10  
11  
12 Given the concerns over the use of Facebook by healthcare professions students, it is  
13  
14 surprising to find that in a recent study, only 10% of US medical schools had a policy of  
15  
16 any kind relating to social networking, and only 5 of the 132 schools studied provided  
17  
18 advice on how students could avoid posting inappropriate content [27]. The American  
19  
20 Medical Association has recently issued a report on professionalism in the use of social  
21  
22 media [28], and a number of other organizations have suggested guidelines for  
23  
24 physicians using social networking sites [29-33], but so far there is no generally-  
25  
26 accepted policy for students of the health professions.  
27  
28  
29  
30  
31

32  
33  
34 Some have gone so far as to suggest we need to “divorce” the personal from the  
35  
36 professional online, creating separate Facebook identities with “dual-citizenship” [34].  
37  
38 We believe that such concerns about Facebook use by healthcare professionals may be  
39  
40 excessive and that social networking software is not dangerous or something to be  
41  
42 feared, policed, or banned [35]. Online technologies are simply tools which are neither  
43  
44 inherently good nor bad [36,37]; in some ways, social networking technologies act as a  
45  
46 “mirror” which reflects all of our activities, including some activities we would rather not  
47  
48 show to the world [38].  
49  
50  
51  
52  
53  
54  
55  
56  
57  
58  
59  
60

1  
2  
3 Our study was limited in several areas. Firstly, we estimated the response rate to the  
4  
5 online survey at about 17%. This is relatively low, although the total number of  
6  
7 responses is higher than most previous studies in this area. Secondly, response bias is  
8  
9 likely: non-users of social networking software would probably be less likely to respond  
10  
11 to a survey about Facebook, and would have less strong opinions about its use. Despite  
12  
13 these limitations, we believe we have shown that use of Facebook is widespread among  
14  
15 healthcare students, and that we have identified important areas for education  
16  
17 policymakers to focus on.  
18  
19  
20  
21  
22  
23

24 We believe that studies such as this are important in exploring and understanding the  
25  
26 pedagogy and practices of Facebook use and help students navigate the dilemmas  
27  
28 associated with becoming 21st century healthcare professionals.  
29  
30  
31  
32  
33  
34  
35  
36  
37  
38  
39  
40  
41  
42  
43  
44  
45  
46  
47  
48  
49  
50  
51  
52  
53  
54  
55  
56  
57  
58  
59  
60

1  
2  
3  
4  
5  
6 **Disclosures**  
7

8  
9 *Disclaimers*

10  
11 None

12  
13  
14 *Previous presentations*

15  
16 Previously presented at the 2012 Canadian Conference on Medical Education and  
17 published in abstract form as:  
18

19  
20  
21 Facebook Use By Healthcare Students And Faculty: Do We Need Guidelines For  
22 Online Professionalism? P Kirwan, J White, S Ross. *Medical Education* 2012; 46  
23  
24 (Suppl. 1): 53  
25  
26  
27  
28  
29  
30  
31  
32  
33  
34  
35  
36  
37  
38  
39  
40  
41  
42  
43  
44  
45  
46  
47  
48  
49  
50  
51  
52  
53  
54  
55  
56  
57  
58  
59  
60

Table 1. Representative Quotations

|                                              |                                                                                                                                                                                                                                                                                                                                                                                                                                                                                                                                                                                                                                                                                                                                                                                                                                                                                                                                                                                            |
|----------------------------------------------|--------------------------------------------------------------------------------------------------------------------------------------------------------------------------------------------------------------------------------------------------------------------------------------------------------------------------------------------------------------------------------------------------------------------------------------------------------------------------------------------------------------------------------------------------------------------------------------------------------------------------------------------------------------------------------------------------------------------------------------------------------------------------------------------------------------------------------------------------------------------------------------------------------------------------------------------------------------------------------------------|
| Patient confidentiality                      | <p>Disclosing confidential information about a patient to the general public is never permissible.</p> <p>One fellow student ... described the age of the patient, gender, and exactly what injuries they sustained in detail ... she did not disclose the name of this patient, but if my Grandma had an accident and was taken to this small rural hospital last night, it would not be hard to figure out that was who she was talking about. If you want to "debrief" to your friends on a one to one level about what you saw or experienced that it is fine. But putting it up as your "status" is inappropriate and not necessary. She was doing it so that all the other non-nurses on her friends list can see what a cool job she has. When people say they had, "the worst patient ever today", or when they discuss "helped deliver a baby in the front lobby of the hospital today".... I know if that had been me I would not want someone posting it all over Facebook.</p> |
| Activities considered unprofessional         | <p>Many students post pictures of them partying on the weekend, which could generate negative opinions about the healthcare profession because it is not the behavior expected of a professional.</p>                                                                                                                                                                                                                                                                                                                                                                                                                                                                                                                                                                                                                                                                                                                                                                                      |
| Unprofessional material observed from others | <p>A lot of nursing students share their frustrations of the faculty on Facebook, and will tell positive stories about their time at clinical.</p> <p>My most appalling example is photos of a peer with a cadaver that were posted on Facebook.</p>                                                                                                                                                                                                                                                                                                                                                                                                                                                                                                                                                                                                                                                                                                                                       |
| Unprofessional material posted by self       | <p>I have unprofessional pictures on Facebook, and don't see any conflict with this in my professional life as a soon to be registered nurse</p> <p>The odd time this has happened has been when I've been intoxicated.</p> <p>In my first career, around 5 years ago (when FB was relatively new), I posted on a colleagues wall asking about a client. I was asking in a caring manner, but still should not have. Lesson learned. Now I do not have work colleagues on my FB nor would I write about a client.</p> <p>Something inappropriate was said in class by a professor and I joined a thread poking fun at that professor. I did remove the post when I realized what I had done</p>                                                                                                                                                                                                                                                                                            |
| Unprofessional material affecting self       | <p>I'm sure a lot of the pictures of me during my undergrad could be considered unprofessional.</p>                                                                                                                                                                                                                                                                                                                                                                                                                                                                                                                                                                                                                                                                                                                                                                                                                                                                                        |
| Freedom of speech                            | <p>If patients and clients have the right to have their personal lives and information kept from being disclosed, then me being a health professional - I also have a personal life. One that is enjoyed and should be able to be enjoyed freely without interference or judgment.</p>                                                                                                                                                                                                                                                                                                                                                                                                                                                                                                                                                                                                                                                                                                     |

|                         |                                                                                                                                                                                                                                                                                                                                                                                                                                                                                                                                                                                                                                                                                                                       |
|-------------------------|-----------------------------------------------------------------------------------------------------------------------------------------------------------------------------------------------------------------------------------------------------------------------------------------------------------------------------------------------------------------------------------------------------------------------------------------------------------------------------------------------------------------------------------------------------------------------------------------------------------------------------------------------------------------------------------------------------------------------|
| Risk                    | <p>Facebook is tons of fun... but a scary place! Way too much info floating around. People can make things up, or post photos of you without your consent.</p> <p>I think one has to be very careful with Facebook, and often I don't think people realize the negative affects it can have.</p> <p>Many people can misjudge a post on a social media site or take it out of context, resulting in a false negative image for the user.</p>                                                                                                                                                                                                                                                                           |
| Control                 | <p>I have no control over who snaps a picture of me doing something in my personal life and posting them on Facebook.</p> <p>You have to be squeaky clean everywhere in life, or Facebook could be used to haunt you.</p> <p>A friend posted pictures of me and some of my other friends acting silly, and I was upset that she had not earlier asked for my consent or the consent of my friends who were against the pictures being posted, so i made her remove the pictures.</p> <p>There are photos of me being silly/drunk from earlier years of my life on Facebook, but I have untagged myself. There is nothing really bad because I would never let someone take a really unprofessional picture of me.</p> |
| Attitudes to guidelines | <p>I firmly support the idea of social media guidelines imparted by the university and/or professional licensing body.</p> <p>Some guidelines should be in place to set a standard but definitely not a list of "Don'ts" that would restrict our freedom</p> <p>Guidelines could help by making things more concrete, though in the end, I think things are up to one's professional judgment</p>                                                                                                                                                                                                                                                                                                                     |

Table 2.

| Online behaviour                                                                                      | Percentage classifying as 'unprofessional' |
|-------------------------------------------------------------------------------------------------------|--------------------------------------------|
| Posts that disclose information about a patient/client                                                | 99                                         |
| Posts depicting illicit drug consumption                                                              | 94                                         |
| Petty criminal activity                                                                               | 91                                         |
| Photos of a patient/client                                                                            | 91                                         |
| Posts involving overt sexual content                                                                  | 86                                         |
| Attitudes of superiority or condescending behaviour (assumed because of professional status)          | 73                                         |
| Posts containing partial nudity                                                                       | 82                                         |
| Obscene gestures in photos (middle finger, etc)                                                       | 72                                         |
| Status updates describing substantial alcohol consumption at a party                                  | 69                                         |
| Pictures of an individual clearly acting drunk                                                        | 68                                         |
| Endorsements of a pharmaceutical or health product without a conflict of interest disclosure          | 58                                         |
| Critical comments about a lecturer or preceptor                                                       | 69                                         |
| Swearing or foul language                                                                             | 60                                         |
| Critical comments of course material, your program, faculty, or the university                        | 49                                         |
| Posts describing an interaction with a patient/client, that do not reveal any identifying information | 40                                         |
| Making opinionated comments about controversial issues                                                | 22                                         |
| Displaying membership in online groups dealing with controversial issues                              | 17                                         |
| A picture of an individual having one alcoholic beverage                                              | 9                                          |
| Displaying your current relationship status                                                           | 5                                          |



## REFERENCES

1. Gonzalez N. Facebook Marketing Statistics [Internet]. <http://www.checkfacebook.com>. [cited 2012 Oct 25]. Available from: <http://www.checkfacebook.com/>
2. Gray K, Annabell L, Kennedy G. Medical students' use of Facebook to support learning: Insights from four case studies. *Med Teach*. 2010;**32**:971–6.
3. Hawn C. Take Two Aspirin And Tweet Me In The Morning: How Twitter, Facebook, And Other Social Media Are Reshaping Health Care. *Health Affairs*. 2009;**28**:361–8.
4. McGowan BS, Wasko M, Vartabedian BS, Miller RS, Freiherr DD, Abdolrasulnia M. Understanding the Factors That Influence the Adoption and Meaningful Use of Social Media by Physicians to Share Medical Information. *J Med Internet Res*; 2012, e117.
5. Glick PL, Yamout SZ. Social media for surgeons: Understand it, embrace it, and leverage it for our profession and our patient. *Surgery*. 2012;**152**:941–2.
6. Jain SH. Practicing medicine in the age of Facebook. *N Engl J Med*. 2009 Aug 13;**361**:649–51.
7. Lagu T, Greysen SR. Physician, monitor thyself: professionalism and accountability in the use of social media. *J Clin Ethics*. 2011;**22**:187–90.
8. Cain J. Online social networking issues within academia and pharmacy education. *Am J Pharm Educ*. 2008;**72**:10.
9. Kashani R, Burwash S, Hamilton A. To be or not to be on Facebook: this is the question. *Occup Ther Now*. 2010;**12**:19–22.
10. Gorrindo T, Gorrindo PC, Groves JE. Intersection of Online Social Networking with Medical Professionalism: Can Medicine Police the Facebook Boom? *J Gen Intern Med* . 2008;**23**:2155–5.
11. Feldman MD. From the Editors' Desk: What You Don't Know Could Hurt You. *J Gen Int Med*. 2010;**25**:1139–9.
12. Giordano C, Giordano C. Health professions students' use of social media. *J Allied Health*. 2011;**40**:78–81.
13. Schulman CI, Kuchkarian FM, Withum KF, Boecker FS, Graygo JM. Influence of social networking websites on medical school and residency selection process. *Postgraduate Medical Journal*. 2012, epub PMID 23139411

14. Thompson LA, Dawson K, Ferdig R, Black EW, Boyer J, Coutts J, et al. The Intersection of Online Social Networking with Medical Professionalism. *J Gen Int Med.* 2008;**23**:954–7.
15. MacDonald J, Sohn S, Ellis P. Privacy, professionalism and Facebook: a dilemma for young doctors. *Med Educ.* 2010;**44**:805–13.
16. Golden JB, Sweeny L, Bush B, Carroll WR. Social networking and professionalism in otolaryngology residency applicants. *The Laryngoscope.* 2012;**122**:1493–6.
17. Chretien KC, Greysen SR, Chretien J-P, Kind T. Online posting of unprofessional content by medical students. *JAMA: The Journal of the American Medical Association.* 2009;**302**:1309–15.
18. Chretien KC, Goldman EF, Beckman L, Kind T. It's your own risk: medical students' perspectives on online professionalism. *Acad Med.* 2010;**85**:S68–71.
19. Karl, K. & Peluchette, J. (2009). Facebook follies: who suffers most? In C. Romm Livermore & K. Setzekorn (Eds.), *Social Networking Communities and E-Dating Services: Concepts and Implications* (pp. 212-224). Hershey, PA: IGI Global.
20. Peluchette J, Karl K. Social networking profiles: an examination of student attitudes regarding use and appropriateness of content. *Cyberpsychol Behav.* 2008;**11**:95–7.
21. Karl, K. & Peluchette, J. (2008). Students' postings on Facebook profiles: "What were they thinking?!". *Proceedings of 2008 International Academy of Management and Business* (pp. 1-15). San Diego, California
22. Karl K, Peluchette J, Schlagel C. A Cross-Cultural Examination of Student Attitudes and Gender Differences in Facebook Profile Content. *International Journal of Virtual Communities and Social Networking.* 2010;**2**:11-31.
23. Christofides E, Muise A, Desmarais S. Information Disclosure and Control on Facebook: Are They Two Sides of the Same Coin or Two Different Processes? *CyberPsychology & Behavior.* 2009;**12**:341–5.
24. Newman MW, Lauterbach D, Munson SA. It's not that I don't have problems, I'm just not putting them on Facebook: challenges and opportunities in using online social networks for health. *Proceedings of the ACM 2011 conference on Computer Supported Cooperative Work*, p.341-350.
25. Moore K. The influence of personality on Facebook usage, wall postings, and regret. *Computers in Human Behavior,* 2012;**28**:267–274.
26. White J, Brownell K, Lemay J-F, Lockyer JM. "What do they want me to say?" The hidden curriculum at work in the medical school selection process: a qualitative

- 1  
2  
3 study. BMC Med Educ. 2012;**12**:17.  
4  
5  
6 27. Kind T, Genrich G, Sodhi A, Chretien KC. Social media policies at US medical  
7 schools. Med Educ Online. 2010;15.  
8  
9 28. Shore R, Halsey J, Shan K, Crigger B-J, Douglas SP. Report of the AMA Council  
10 on Ethical and Judicial Affairs: Professionalism in the Use of Social Media. J Clin  
11 Ethics. 2011;**22**:165–72.  
12  
13 29. Guseh JS, Brendel RW, Brendel DH. Medical professionalism in the age of online  
14 social networking. J Med Ethics. 2009;**35**:584–6.  
15  
16  
17 30. Canadian Medical Association. Social media and Canadian physicians issues and  
18 rules of engagement [Internet]. Canadian Medical Association. 2012 [cited 2012  
19 Dec 9]. pages 1–3. Available from: [http://Social media and Canadian physicians -](http://Social media and Canadian physicians - issues and rules of engagement)  
20 [issues and rules of engagement](http://Social media and Canadian physicians - issues and rules of engagement)  
21  
22  
23 31. American Medical Association. Social media and the medical profession: a guide  
24 to online professionalism for medical practitioners and medical students.  
25 Australian Medical Association; 2010; p.1–14.  
26  
27 32. British Medical Association. Using social media: practical and ethical guidelines  
28 for doctors and medical students. British Medical Association; 2012, p.1–8.  
29  
30 33. Doctors' use of social media. General Medical Council; 2012, p.1–6.  
31  
32 34. Mostaghimi A, Crotty BH. Professionalism in the digital age. Ann Intern Med.  
33 2011;**154**:560–2.  
34  
35 35. George DR, Green MJ. Beyond Good and Evil: Exploring Medical Trainee Use of  
36 Social Media. Teaching and Learning in Medicine. 2012;**24**:155–7.  
37  
38 36. Thompson LA, Black EW, Dawson K, Ferdig R, Black NP. J Gen Intern Med.  
39 2008;**23**:2156.  
40  
41 37. White J, Sharma N. Podcasting: a technology, not a toy. Adv in Health Sci Educ.  
42 2012;**17**:601-603.  
43  
44 38. Greysen SR, Kind T, Chretien KC. Online Professionalism and the Mirror of Social  
45 Media. J Gen Intern Med. 2010;**25**:1227–9.  
46  
47  
48  
49  
50  
51  
52  
53  
54  
55  
56  
57  
58  
59  
60

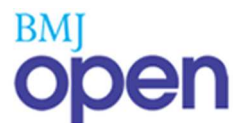

**"Have you seen what's on Facebook?" The use of social networking software by healthcare professions students.**

|                                 |                                                                                                                                                                                                                                                                        |
|---------------------------------|------------------------------------------------------------------------------------------------------------------------------------------------------------------------------------------------------------------------------------------------------------------------|
| Journal:                        | <i>BMJ Open</i>                                                                                                                                                                                                                                                        |
| Manuscript ID:                  | bmjopen-2013-003013.R1                                                                                                                                                                                                                                                 |
| Article Type:                   | Research                                                                                                                                                                                                                                                               |
| Date Submitted by the Author:   | 28-Apr-2013                                                                                                                                                                                                                                                            |
| Complete List of Authors:       | White, Jonathan; University of Alberta, Surgery<br>Kirwan, Paul; University of Alberta, Surgery<br>Lai, Krista; University of Alberta, Family Medicine<br>Walton, Jennifer; University of Alberta, Pediatrics<br>Ross, Shelley; University of Alberta, Family Medicine |
| <b>Primary Subject Heading</b>: | Medical education and training                                                                                                                                                                                                                                         |
| Secondary Subject Heading:      | Medical education and training                                                                                                                                                                                                                                         |
| Keywords:                       | Information technology < BIOTECHNOLOGY & BIOINFORMATICS, World Wide Web technology < BIOTECHNOLOGY & BIOINFORMATICS, Information management < BIOTECHNOLOGY & BIOINFORMATICS                                                                                           |
|                                 |                                                                                                                                                                                                                                                                        |

SCHOLARONE™  
Manuscripts

**Title**

“Have you seen what’s on Facebook?” The use of social networking software by healthcare professions students

---

**Authors**

J White, P Kirwan, K Lai, J Walton, S Ross.

**Affiliations**

J White, Associate Professor, Department of Surgery, University of Alberta.

P Kirwan, Research Assistant, Department of Surgery, University of Alberta.

K Lai, Medical Student, Department of Family Medicine, University of Alberta.

J Walton, Assistant Professor, Department of Pediatrics, University of Alberta.

S Ross, Assistant Professor, Department of Family Medicine, University of Alberta.

**Corresponding Author****Dr Jonathan White**

Address: Room 202 Community Services Centre, Royal Alexandra Hospital,  
10240 Kingsway Avenue, Edmonton AB T5H 3V9, Canada

Email: [jwhite1@ualberta.ca](mailto:jwhite1@ualberta.ca)

Phone: (780) 735-5147

Fax: (780) 735-5459

### Competing Interest Declaration

"All authors have completed the Unified Competing Interest form at [www.icmje.org/coi\\_disclosure.pdf](http://www.icmje.org/coi_disclosure.pdf) (available on request from the corresponding author) and declare that (1) [initials of relevant authors] have support from [name of company] for the submitted work; (2) [initials of relevant authors] have [no or specified] relationships with [name of companies] that might have an interest in the submitted work in the previous 3 years; (3) their spouses, partners, or children have [specified] financial relationships that may be relevant to the submitted work; and (4) [initials of relevant authors] have no [or specified] non-financial interests that may be relevant to the submitted work."

### Exclusive Licence Statement

"The Corresponding Author has the right to grant on behalf of all authors and does grant on behalf of all authors, an exclusive licence (or non exclusive for government employees) on a worldwide basis to the BMJ Publishing Group Ltd and its Licensees to permit this article (if accepted) to be published in BMJ editions and any other BMJ PGL products and sublicences to exploit all subsidiary rights, as set out in our licence ( <http://resources.bmj.com/bmj/authors/checklists-forms/licence-for-publication>)."

### Contributorship statement

All authors are justifiably credited with authorship, according to the authorship criteria. In detail:  
Jonathan White: study conception and design, analysis and interpretation of data, revising the article, final approval of the version to be published  
Paul Kirwan Wallace: data collection, analysis and interpretation of data, interviewer, input to drafts of the article, final approval of the version to be published  
Krista Lai: analysis and interpretation of data, input to drafts of the article, final approval of the version to be published  
Jennifer Walton: analysis and interpretation of data, input to drafts of the article, final approval of the version to be published  
Shelley Ross: study conception and design, analysis and interpretation of data, revising the article, final approval of the version to be published

### Acknowledgements

Funding for this project was provided University of Alberta Faculty of Medicine and Dentistry summer studentships in 2011 and 2012. We would like to acknowledge the assistance of Ms Shannon Erichsen with this project.

### Ethical Approval

Ethics approval was obtained from the University of Alberta Health Research Ethics Board (ref: 22787).

## ABSTRACT

**Objective.** The use of social networking software has become ubiquitous in our society. The aim of this study was to explore the attitudes and experiences of healthcare professional students using Facebook at our school, and to determine if there is a need for development of policy to assist students with utilizing this technology during their professional education.

**Design.** A mixed-methods approach was employed, using semi-structured interviews to identify important themes which were further explored using an online survey. A combination of descriptive statistics and thematic analysis was used to analyse the data obtained.

**Setting & Participants:** Students of Medicine, Nursing, Pharmacy, Speech & Language Pathology, Occupational Therapy, Physical Therapy, Dentistry, Dental Hygiene and Medical Laboratory Science at a large North American university.

**Results.** 14 interviews were analysed in-depth, and 682 healthcare professions students responded to the survey, an approximate 17% response rate. 93% reported current Facebook use. Themes identified included: patterns of use and attitudes to friendship, attitudes to online privacy, breaches of professional behaviour on Facebook, and attitudes to guidelines relating to Facebook use. A majority considered posting of the following material unprofessional: use of alcohol and drugs, crime, obscenity, patient/client information, sexual content and nudity and criticism of others. 44% reported seeing such material posted by a colleague, and 27% reported posting such

1  
2  
3 material themselves. A majority of participants agreed that guidelines for Facebook use  
4  
5 would be beneficial.  
6  
7

8  
9 **Conclusions.** This study demonstrates that the use of social networking software is  
10  
11 widespread amongst healthcare students at our school, and highlights the challenges  
12  
13 which accompany the use of this new technology. We believe that studies such as this  
14  
15 are important in understanding the pedagogy and practices of Facebook use and in  
16  
17 helping students navigate the dilemmas associated with becoming 21<sup>st</sup> century  
18  
19 healthcare professionals.  
20  
21  
22  
23  
24  
25  
26  
27  
28  
29  
30  
31  
32  
33  
34  
35  
36  
37  
38  
39  
40  
41  
42  
43  
44  
45  
46  
47  
48  
49  
50  
51  
52  
53  
54  
55  
56  
57  
58  
59  
60



### *Article focus*

The use of social networking software has become ubiquitous in our society. Healthcare practitioners and their students have struggled to integrate this new technology with the expectations of professional behaviour.

### *Key messages*

- Social networking software is widespread amongst healthcare students at our school. This paper highlights the challenges which accompany the use of this new technology, including the posting of unprofessional and inappropriate material online.
- We discuss the dilemma of students wanting to share information in a mixed social network in order to remain popular, while also being wary about how material shared will make them appear.
- We suggest that guidelines for the use of social networking software may help our students deal with this dilemma more effectively.

### *Strengths and limitations of this study*

Although the survey element of this study had a relatively low response rate, it did gather data from a large number of students training in several different health professions, and we believe it provides an interesting snapshot of attitudes to social networking software at our school. The low response rate to the survey means that we cannot exclude the possibility of response bias and that we cannot easily generalize our findings to the whole population. Given these limitations, we believe that we have

1  
2  
3 shown that use of Facebook is widespread among the healthcare students we studied,  
4  
5 and that we have identified areas for education policymakers to focus on.  
6  
7  
8  
9  
10  
11  
12  
13  
14  
15  
16  
17  
18  
19  
20  
21  
22  
23  
24  
25  
26  
27  
28  
29  
30  
31  
32  
33  
34  
35  
36  
37  
38  
39  
40  
41  
42  
43  
44  
45  
46  
47  
48  
49  
50  
51  
52  
53  
54  
55  
56  
57  
58  
59  
60

For peer review only

## INTRODUCTION

In recent years, the use of social networking websites such as Facebook, MySpace and Twitter has become ubiquitous in many western countries. At the time of writing, there are over 18.5 million Facebook users in Canada alone, and over 70% of the Canadian population possesses a Facebook account [1]. Facebook use is highly prevalent among medical students: at least 60% of medical students in the US, and over 70% of medical students in the UK are active users [2,3].

A number of authors have written that social networking software has the potential to revolutionize healthcare by increasing interaction between providers and clients and facilitating the free flow of information relating to healthcare [4]. A recent study among primary care physicians and oncologists demonstrated that a majority of those studied used social networking software to keep abreast of new developments in their field and to share knowledge [5]. A recent series of articles has called for surgeons to embrace social media as well [6].

Other authors have called for caution in healthcare providers engaging with social networking software. The software encourages users to share the events of their lives; for individuals training to enter the health professions, such sharing may be in conflict with requirements for confidentiality and professionalism of the profession for which they are training [7]. Some have suggested that Facebook will lead to an unacceptable blurring of the professional and the personal, and make it difficult to maintain proper

1  
2  
3 boundaries and professional principles [8,9]. Other authors have gone further and  
4 suggested that it may be best for healthcare providers not to engage in social  
5 networking online [10], or that Facebook use should be monitored or policed in some  
6 way [11,12].  
7  
8  
9  
10  
11

12  
13  
14  
15 This study grew out of a discussion within our medical school about our own students'  
16 use of Facebook, based on a number of incidents in which we thought our students  
17 could have used Facebook more appropriately. This led to a debate about how (or  
18 indeed if) we should advise our students about using such social networking software.  
19 We decided to focus on Facebook use instead of Twitter or MySpace, as this has been  
20 shown to be the most widely-adopted form of social networking software at the moment  
21 [6,13,14]. Most other studies on online social networking in healthcare education have  
22 focused on medical students, but we decided to sample a larger population to obtain a  
23 broad snapshot of the use of Facebook in all of our healthcare faculties at our school.  
24  
25  
26  
27  
28  
29  
30  
31  
32  
33  
34  
35  
36  
37  
38

39 The aim of this study was to explore the attitudes and experiences of healthcare  
40 professional students using Facebook at our university, with the aim of determining if  
41 there is a need for development of policy or guidelines to assist students with integrating  
42 this new technology as they progress in their education.  
43  
44  
45  
46  
47  
48  
49  
50  
51  
52  
53  
54  
55  
56  
57  
58  
59  
60

## METHODS

We employed a mixed-methods approach, conducting interviews with a small number of healthcare professions students first to identify important themes related to the use of social networking software, and then developing an online survey which was administered to a larger group.

Semi-structured interviews were conducted with 14 healthcare professions students at our university about participants' current use of social networking services. Interview questions were developed by the authors after a review of the literature (Appendix 1). Convenience sampling was used for recruitment of interview subjects: participants were contacted through email, inviting voluntary participation in an interview. Students in nursing, medicine, dentistry, pharmacy, dental hygiene, speech and language pathology, occupational therapy and physical therapy were included in the invitation email distribution list and a single reminder email was sent. There were no specific exclusion criteria. Consent was obtained in person by the interviewer. Interviews lasted 30-45 minutes, and were designed to elicit information about participants' current use of social networking software. Interviews were audio-recorded and transcribed by a research assistant; transcripts were then analyzed to identify common themes using a simple thematic analysis approach.

Themes identified from interview data were used to construct an anonymous online survey (Appendix 2). Items included a range of single-best-choice, Likert-scale, ranking

1  
2  
3 and free response items. All items were revised by testing with health professions  
4  
5 students before the survey was distributed. The survey was distributed by email to  
6  
7 students in all of the healthcare professions listed above. Participants were contacted  
8  
9 through email, inviting voluntary participation in the survey; participants who had been  
10  
11 interviewed were free to respond to the survey too.  
12  
13

14  
15  
16  
17 Descriptive statistics were used to describe responses to each question. Free-text  
18  
19 responses were analyzed to identify common themes and representative quotations.  
20  
21 This study reports our findings relating to students' use of Facebook, unprofessional  
22  
23 behaviours observed online, and about the need for guidelines relating to social  
24  
25 networking software for healthcare professionals. Ethics approval was obtained from the  
26  
27 local Health Research Ethics Board.  
28  
29  
30  
31  
32

## 33 34 **RESULTS**

35  
36 The study took place in fall 2011. We identified the following themes at interview:  
37  
38 patterns of Facebook use, attitudes to friendship on Facebook, attitudes to online  
39  
40 privacy, breaches of professional behaviour posted on Facebook (including use of  
41  
42 alcohol and drugs, crime, obscenity, patient/client information, sexual content and  
43  
44 nudity, criticism of others) and attitudes to guidelines relating to Facebook use.  
45  
46  
47  
48  
49

50  
51 A total of 682 students responded to the survey, a response rate of approximately 17%  
52  
53 (estimated total number of students: 3984). The number of respondents, response rate  
54  
55 and gender balance from each faculty are shown in Table 1. As expected, females  
56  
57  
58  
59  
60

1  
2  
3 outnumbered males in all the faculties sampled. In the following section, quotations from  
4  
5 free-response items are presented to highlight particular themes identified, while  
6  
7 percentages in brackets are used to indicate the proportion of respondents to the online  
8  
9 survey who expressed agreement with a particular theme or statement observed.  
10  
11

12 Additional representative quotations are presented in Table 2.  
13  
14

15  
16  
17 93% of respondents reported having a Facebook account; 76% described checking  
18  
19 their account at least 2 times per day, with 39% checking at least 5 times a day. When  
20  
21 asked “who is on your friend list?”, respondents indicated the following categories: other  
22  
23 students 96%, previous work colleagues 73%, current work colleagues 44%, previous  
24  
25 instructors 21%, current instructors 5%, previous patients/clients 2%, current  
26  
27 patients/clients 0.3% .  
28  
29  
30  
31

32  
33  
34 Respondents were asked to consider the types of material that they would consider  
35  
36 unprofessional in principle if posted to Facebook (Table 3). 99% of respondents agreed  
37  
38 that it would be unprofessional to post images or text which could be used to identify a  
39  
40 patient. 40% of respondents said it was unprofessional to post anything at all relating to  
41  
42 a patient/client, even without identifying information.  
43  
44  
45  
46  
47

- 48 • *A girl I know openly posts "quotes of the day" from patients she works with in mental*  
49 *health. She does not say who said them, and they are funny, but since I work there*  
50 *too, the info is identifying. I think it crosses a line.*  
51  
52  
53  
54  
55  
56  
57  
58  
59  
60

1  
2  
3 Over 80% considered posts or images relating to the following activities unprofessional:  
4  
5 illicit drug consumption, criminal activity, overt sexual content, partial nudity and  
6  
7  
8  
9  
10  
11  
12  
13  
14  
15  
16  
17  
18  
19  
20  
21  
22  
23  
24  
25  
26  
27  
28  
29  
30  
31  
32  
33  
34  
35  
36  
37  
38  
39  
40  
41  
42  
43  
44  
45  
46  
47  
48  
49  
50  
51  
52  
53  
54  
55  
56  
57  
58  
59  
60

Over 80% considered posts or images relating to the following activities unprofessional: illicit drug consumption, criminal activity, overt sexual content, partial nudity and condescending or superior behaviour. At least 50% considered the following unprofessional: critical comments about a teacher, drunkenness/excessive drinking, swearing, and obscene gestures. Less than 10% objected to posts or photos depicting drinking in moderation, and to posting current relationship status.

- *Plenty of students in my class post pictures of heavy drinking, many swear or have inappropriate sexual innuendo in their status updates.*

44% of respondents described seeing material they considered unprofessional which had been posted to Facebook by a colleague (153 responses). The most common specific examples given included criticism of teachers and programs (56 instances), inappropriate photographs (47 instances), depictions of drunkenness (27), posts about patients (21) and negative comments about patients (13). Other examples included parties attended (9), swearing (8), references to sex (7), inappropriate posts about work (5), negative comments about other professions (5) and consumption of illegal drugs (3). There were also descriptions of errors, negative comments about co-workers, inappropriate behaviour in uniform, nudity, criminal activity, obscene gestures, racist and sexist comments and pictures of a cadaver (1-2 of each).

- *I know a medical student who often posts complaints about her faculty and also personal patient information*



1  
2  
3  
4  
5  
6 27% of respondents admitted to posting material which, with hindsight, they now  
7  
8 considered unprofessional (81 responses). The most common transgressions described  
9  
10 were posting inappropriate pictures (15 instances), swearing (13), criticizing teachers  
11  
12 and programs (9), drinking (9), posting comments open to misinterpretation (8) and  
13  
14 parties (5). There were 3 instances of posting sexual content, 2 posts about patients  
15  
16 and 1 example of expressing negative views about a patient.  
17  
18  
19  
20  
21

- 22 • *I've wrote personal posts before that probably shouldn't have been posted.*  
23  
24  
25  
26

27 44% described having material posted about them which they felt made them look  
28  
29 unprofessional (137 examples). The vast majority of these instances related to the  
30  
31 posting of photographs online (106); the most common areas of concern related to  
32  
33 alcohol consumption (39) and attending parties (15); there were also examples of nudity  
34  
35 (4), sexual material (3) and information pertaining to a relationship (1). 18% of  
36  
37 respondents reported that the posting of such material had made them consider  
38  
39 withdrawing from the use of social networking software.  
40  
41  
42  
43  
44  
45

- 46 • *People have posted hilarious photos from parties and other events some of which*  
47  
48 *depict me as being intoxicated but once again I'm hoping that due to privacy settings*  
49  
50 *the general public cannot see these.*  
51  
52  
53  
54

55 As a group, respondents were ambiguous about posting material on Facebook. Some  
56  
57  
58  
59  
60

1  
2  
3 students considered it intrusive that faculty should even be enquiring about their  
4 Facebook use, as they considered this too personal a topic for discussion. Others  
5 expressed concern that faculty's expectations around their online activities were  
6 unreasonable. Others took the view that they should be able to post what they like as  
7 long as they could control who has access.  
8  
9  
10  
11  
12  
13

- 14  
15  
16  
17  
18 • *Just because we are in a health care profession does not mean that we do not have*  
19 *freedom of speech.*  
20  
21

22  
23  
24 Students expressed the view that posting material to Facebook was associated with  
25 some risk to their current position and future prospects.  
26  
27  
28

- 29  
30  
31  
32 • *I am aware that my behaviour in all domains affects my reputation, so I am*  
33 *careful about who I am seen with and what I do.*  
34  
35  
36  
37

38  
39 Many students described censoring themselves and removing material they had posted  
40 or been tagged in previously, or requesting to have their name removed from photos  
41 posted by other users.  
42  
43  
44

- 45  
46 • *I went through my Facebook photos and took down the photos I had posted with*  
47 *me in party pictures from my first undergrad degree. If I even looked drunk or*  
48 *questionable, or if the party had a funny, (but inappropriate theme) then I took*  
49 *those pictures down as well. I don't generally post a lot of comments, and none*  
50 *that I regret, but a picture is still worth a thousand words.*  
51  
52  
53  
54  
55  
56  
57  
58  
59  
60

1  
2  
3  
4  
5  
6 98% of respondents described having altered the privacy settings of their Facebook  
7  
8 account on at least one occasion; the reasons given for this included protection from  
9  
10 strangers 99%, not trusting Facebook 62%, risk of viewing by potential employers 52%,  
11  
12 advice from peers 30%, and advice from instructors 17%.  
13

- 14  
15  
16  
17  
18 • *I don't really understand the privacy settings, so I just made them strict, just in case.*  
19  
20 • *I don't post anything on Facebook that could compromise me for work in any way.*  
21  
22

23  
24  
25 Lastly, respondents were asked about the use of guidelines relating to the use of social  
26  
27 networking software in health professions education. Many were unfamiliar with existing  
28  
29 guidelines (43%); only 15% agreed that existing guidelines were adequate. A majority  
30  
31 agreed that guidelines would be beneficial: 79% agreed that others would benefit, and  
32  
33 62% stated they would benefit personally.  
34  
35

- 36  
37  
38  
39 • *There are certain guidelines that I think any professional or role model should follow:*  
40  
41 *no photos of inappropriate conduct (nudity, heavy drinking, sexual content, etc),*  
42  
43 *patients/clients should not be added as friends or be able to view photos,*  
44  
45 *confidential information remains confidential.. otherwise, if people are stupid enough*  
46  
47 *to jeopardize their profession by posting something on facebook, they should deal*  
48  
49 *with the consequences (losing a current or potential job, etc)*  
50  
51  
52  
53  
54  
55  
56  
57  
58  
59  
60

## DISCUSSION

This study demonstrates that the use of social networking software is widespread amongst students in the healthcare professions at our university and highlights some of the dilemmas which accompany the use of this new technology.

There was widespread agreement that posting material that can identify a patient/client should be considered unprofessional, as should material relating to drugs, sex, nudity, drunkenness, crime and obscenity. A majority also considered it unprofessional to post critical comments about teachers/programs and posts which could be considered condescending. Despite these stated understandings, nearly half of the students we studied reporting seeing their colleagues posting unprofessional material on Facebook, and over a quarter reported posting such material themselves. There was a wide range of transgressions reported, including criticism of teachers/programs, posting of inappropriate photographs, drunkenness, parties and swearing.

Our findings agree with other recent papers in the field. A study by Giordano & Giordano on healthcare students found that 77% of students used Facebook, and that use was inversely correlated with age [13]. This paper also showed that the main reasons for use were to maintain personal and professional connections, and to obtain up-to-date information. Thompson *et al* examined Facebook use in US medical students and residents, and found that 47% had Facebook accounts, and that only one-third had privacy settings set sufficiently high to prevent public access. A number of accounts

1  
2  
3 contained material relating to substance abuse, sexism, racism, or lack of respect to  
4 patients [3]. A similar study on New Zealand physicians found that 65% had Facebook  
5 accounts, many of which contained public information relating to alcohol consumption,  
6 sexual orientation, and religion [15]. Similar findings have also been observed in US  
7 otolaryngology residents and British medical students [16]. In a recent study, 60% of US  
8 medical schools reported incidents relating to the use of social networking software,  
9 including breaches of patient confidentiality, profanity relating to the school, intoxication  
10 or substance abuse and nudity and sexual relationships. The majority of schools had  
11 issued a warning to the students involved, and a small number had dismissed a student  
12 over the issue [17].  
13  
14  
15  
16  
17  
18  
19  
20  
21  
22  
23  
24  
25  
26  
27  
28

29 Our findings on student attitudes about posting unprofessional material are also  
30 supported by a study which used focus groups to explore the issue among US medical  
31 students [18]. As in our study, students generally agreed that it was unprofessional to  
32 breach patient confidentiality online, but there was less consensus about material  
33 relating to alcohol, drugs, sex and speaking poorly of others. This study also found that  
34 students expressed ambiguity about their use of Facebook, and “viewed online activity  
35 through a lens of personal risk”, considering how what they post could be used to harm  
36 them.  
37  
38  
39  
40  
41  
42  
43  
44  
45  
46  
47  
48  
49  
50

51 The types of material which our students considered problematic are congruent with  
52 other work outside healthcare describing the five main “Facebook Follies” which  
53 employers consider relevant when hiring new employees: negative attitudes to work,  
54  
55  
56  
57  
58  
59  
60

1  
2  
3 profanity, alcohol, drugs, and sexual activity [19]. Students also appear to be aware of  
4  
5 the impact of their online activities, and have identified similar areas that they do not  
6  
7 wish employers to see including drinking and drugs, photographs from parties,  
8  
9  
10 comments from friends, and comments about work [20-22].  
11  
12  
13

14  
15 Christofides *et al* have observed that social networking software encourages people to  
16  
17 disclose more personal information that they would otherwise do in order to remain  
18  
19 popular within a social network, but also generates concern about information control  
20  
21 and privacy [23]. Inappropriate pictures, especially of parties and drinking are a  
22  
23 common cause of concern. As they write:  
24  
25  
26  
27  
28

29 *(Online) identity ... is a social product created not only by what you share, but also by*  
30  
31 *what others share and say about you... the people who are most popular are those*  
32  
33 *whose identity construction is most actively participated in by others... (by) limiting*  
34  
35 *access to personal information... the individual also... potentially reduces his or her*  
36  
37 *popularity. [23]*  
38  
39  
40  
41  
42

43 We hypothesize that students are faced with a difficult dilemma: wanting to share  
44  
45 information in a mixed personal/professional social network in order to remain popular,  
46  
47 while also being wary about how the material they share will make them appear and  
48  
49 who will see it. Others have also described this 'balancing act' between the need to  
50  
51 share information and the desire to manage how one's self is presented [24]. This is a  
52  
53 process of trial and error, and students express regret for the negative consequences of  
54  
55  
56  
57  
58  
59  
60

1  
2  
3 material posted previously [25]. We believe that this process is similar to other  
4  
5 processes of conforming in healthcare education which have been described elsewhere  
6  
7 [26].  
8  
9

10  
11  
12 Given the concerns over the use of Facebook by healthcare professions students, it is  
13  
14 surprising to find that in a recent study, only 10% of US medical schools had a policy of  
15  
16 any kind relating to social networking, and only 5 of the 132 schools studied provided  
17  
18 advice on how students could avoid posting inappropriate content [27]. The American  
19  
20 Medical Association has recently issued a report on professionalism in the use of social  
21  
22 media [28], and a number of other organizations have suggested guidelines for  
23  
24 physicians using social networking sites [29-33], but so far there is no generally-  
25  
26 accepted policy for students of the health professions.  
27  
28  
29  
30  
31

32  
33  
34 Some have gone so far as to suggest we need to “divorce” the personal from the  
35  
36 professional online, creating separate Facebook identities with “dual-citizenship” [34].  
37  
38 We believe that such concerns about Facebook use by healthcare professionals may be  
39  
40 excessive and that social networking software is not dangerous or something to be  
41  
42 feared, policed, or banned [35]. Others have shown that both students and educators  
43  
44 are struggling to integrate this new technology into our existing practices of teaching  
45  
46 and learning [36]. Online technologies are simply tools which are neither inherently  
47  
48 good nor bad [3 37]; in some ways, social networking technologies act as a “mirror”  
49  
50 which reflects all of our activities, including some activities we would rather not show to  
51  
52 the world [38].  
53  
54  
55  
56  
57  
58  
59  
60

1  
2  
3  
4  
5  
6 Our study was limited in several areas. Although the survey element of this study had a  
7  
8 relatively low response rate, it did gather data from a large number of students training  
9  
10 in several different health professions, and we believe it provides an interesting  
11  
12 snapshot of attitudes to social networking software at our school across a number of  
13  
14 different faculties. The low response rate to the survey means that we cannot exclude  
15  
16 the possibility of response bias and that we cannot easily generalize our findings to the  
17  
18 whole population. Given these limitations, we believe that we have shown that use of  
19  
20 Facebook is widespread among the healthcare students we studied, and that we have  
21  
22 identified areas for education policymakers to focus on.  
23  
24  
25  
26  
27  
28

29 We believe that studies such as this are important in exploring and understanding the  
30  
31 pedagogy and practices of Facebook use and help students navigate the dilemmas  
32  
33 associated with becoming 21st century healthcare professionals.  
34  
35  
36  
37  
38  
39  
40  
41  
42  
43  
44  
45  
46  
47  
48  
49  
50  
51  
52  
53  
54  
55  
56  
57  
58  
59  
60



1  
2  
3  
4  
5  
6 **Disclosures**  
7

8  
9 *Disclaimers*

10  
11 None

12  
13  
14 *Previous presentations*

15  
16 Previously presented at the 2012 Canadian Conference on Medical Education and  
17 published in abstract form as:  
18

19  
20  
21 Facebook Use By Healthcare Students And Faculty: Do We Need Guidelines For  
22 Online Professionalism? P Kirwan, J White, S Ross. *Medical Education* 2012; 46  
23  
24 (Suppl. 1): 53  
25  
26  
27  
28  
29  
30  
31  
32  
33  
34  
35  
36  
37  
38  
39  
40  
41  
42  
43  
44  
45  
46  
47  
48  
49  
50  
51  
52  
53  
54  
55  
56  
57  
58  
59  
60

Table 1. Respondents to the online survey

| Faculty                     | Number of respondents to the online survey | Approx response rate (%) | Female:male ratio |
|-----------------------------|--------------------------------------------|--------------------------|-------------------|
| Medicine                    | 232                                        | 33                       | 58:42             |
| Nursing                     | 200                                        | 15                       | 95:5              |
| Pharmacy                    | 82                                         | 16                       | 73:27             |
| Speech & Language Pathology | 54                                         | 24                       | 94:6              |
| Occupational Therapy        | 43                                         | 11                       | 81:19             |
| Physical Therapy            | 24                                         | 5                        | 83:17             |
| Dentistry & Dental Hygiene  | 24                                         | 8                        | 61:39             |
| Medical Laboratory Science  | 23                                         | 20                       | 78:22             |
| Total                       | 682                                        | 17                       | 77:23             |

Table 2. Representative Quotations

|                                              |                                                                                                                                                                                                                                                                                                                                                                                                                                                                                                                                                                                                                                                                                                                                                                                                                                                                                                                                                                                            |
|----------------------------------------------|--------------------------------------------------------------------------------------------------------------------------------------------------------------------------------------------------------------------------------------------------------------------------------------------------------------------------------------------------------------------------------------------------------------------------------------------------------------------------------------------------------------------------------------------------------------------------------------------------------------------------------------------------------------------------------------------------------------------------------------------------------------------------------------------------------------------------------------------------------------------------------------------------------------------------------------------------------------------------------------------|
| Patient confidentiality                      | <p>Disclosing confidential information about a patient to the general public is never permissible.</p> <p>One fellow student ... described the age of the patient, gender, and exactly what injuries they sustained in detail ... she did not disclose the name of this patient, but if my Grandma had an accident and was taken to this small rural hospital last night, it would not be hard to figure out that was who she was talking about. If you want to "debrief" to your friends on a one to one level about what you saw or experienced that it is fine. But putting it up as your "status" is inappropriate and not necessary. She was doing it so that all the other non-nurses on her friends list can see what a cool job she has. When people say they had, "the worst patient ever today", or when they discuss "helped deliver a baby in the front lobby of the hospital today".... I know if that had been me I would not want someone posting it all over Facebook.</p> |
| Activities considered unprofessional         | <p>Many students post pictures of them partying on the weekend, which could generate negative opinions about the healthcare profession because it is not the behavior expected of a professional.</p>                                                                                                                                                                                                                                                                                                                                                                                                                                                                                                                                                                                                                                                                                                                                                                                      |
| Unprofessional material observed from others | <p>A lot of nursing students share their frustrations of the faculty on Facebook, and will tell positive stories about their time at clinical.</p> <p>My most appalling example is photos of a peer with a cadaver that were posted on Facebook.</p>                                                                                                                                                                                                                                                                                                                                                                                                                                                                                                                                                                                                                                                                                                                                       |
| Unprofessional material posted by self       | <p>I have unprofessional pictures on Facebook, and don't see any conflict with this in my professional life as a soon to be registered nurse</p> <p>The odd time this has happened has been when I've been intoxicated.</p> <p>In my first career, around 5 years ago (when FB was relatively new), I posted on a colleagues wall asking about a client. I was asking in a caring manner, but still should not have. Lesson learned. Now I do not have work colleagues on my FB nor would I write about a client.</p> <p>Something inappropriate was said in class by a professor and I joined a thread poking fun at that professor. I did remove the post when I realized what I had done</p>                                                                                                                                                                                                                                                                                            |
| Unprofessional material affecting self       | <p>I'm sure a lot of the pictures of me during my undergrad could be considered unprofessional.</p>                                                                                                                                                                                                                                                                                                                                                                                                                                                                                                                                                                                                                                                                                                                                                                                                                                                                                        |
| Freedom of speech                            | <p>If patients and clients have the right to have their personal lives and information kept from being disclosed, then me being a health professional - I also have a personal life. One that is enjoyed and should be able to be enjoyed freely without interference or judgment.</p>                                                                                                                                                                                                                                                                                                                                                                                                                                                                                                                                                                                                                                                                                                     |

|                         |                                                                                                                                                                                                                                                                                                                                                                                                                                                                                                                                                                                                                                                                                                                       |
|-------------------------|-----------------------------------------------------------------------------------------------------------------------------------------------------------------------------------------------------------------------------------------------------------------------------------------------------------------------------------------------------------------------------------------------------------------------------------------------------------------------------------------------------------------------------------------------------------------------------------------------------------------------------------------------------------------------------------------------------------------------|
| Risk                    | <p>Facebook is tons of fun... but a scary place! Way too much info floating around. People can make things up, or post photos of you without your consent.</p> <p>I think one has to be very careful with Facebook, and often I don't think people realize the negative affects it can have.</p> <p>Many people can misjudge a post on a social media site or take it out of context, resulting in a false negative image for the user.</p>                                                                                                                                                                                                                                                                           |
| Control                 | <p>I have no control over who snaps a picture of me doing something in my personal life and posting them on Facebook.</p> <p>You have to be squeaky clean everywhere in life, or Facebook could be used to haunt you.</p> <p>A friend posted pictures of me and some of my other friends acting silly, and I was upset that she had not earlier asked for my consent or the consent of my friends who were against the pictures being posted, so i made her remove the pictures.</p> <p>There are photos of me being silly/drunk from earlier years of my life on Facebook, but I have untagged myself. There is nothing really bad because I would never let someone take a really unprofessional picture of me.</p> |
| Attitudes to guidelines | <p>I firmly support the idea of social media guidelines imparted by the university and/or professional licensing body.</p> <p>Some guidelines should be in place to set a standard but definitely not a list of "Don'ts" that would restrict our freedom</p> <p>Guidelines could help by making things more concrete, though in the end, I think things are up to one's professional judgment</p>                                                                                                                                                                                                                                                                                                                     |

Table 3. Types of material participants would consider unprofessional in principle if posted to Facebook

| Online behaviour                                                                                      | Percentage classifying as 'unprofessional' |
|-------------------------------------------------------------------------------------------------------|--------------------------------------------|
| Posts that disclose information about a patient/client                                                | 99                                         |
| Posts depicting illicit drug consumption                                                              | 94                                         |
| Petty criminal activity                                                                               | 91                                         |
| Photos of a patient/client                                                                            | 91                                         |
| Posts involving overt sexual content                                                                  | 86                                         |
| Attitudes of superiority or condescending behaviour (assumed because of professional status)          | 73                                         |
| Posts containing partial nudity                                                                       | 82                                         |
| Obscene gestures in photos (middle finger, etc)                                                       | 72                                         |
| Status updates describing substantial alcohol consumption at a party                                  | 69                                         |
| Pictures of an individual clearly acting drunk                                                        | 68                                         |
| Endorsements of a pharmaceutical or health product without a conflict of interest disclosure          | 58                                         |
| Critical comments about a lecturer or preceptor                                                       | 69                                         |
| Swearing or foul language                                                                             | 60                                         |
| Critical comments of course material, your program, faculty, or the university                        | 49                                         |
| Posts describing an interaction with a patient/client, that do not reveal any identifying information | 40                                         |
| Making opinionated comments about controversial issues                                                | 22                                         |
| Displaying membership in online groups dealing with controversial issues                              | 17                                         |
| A picture of an individual having one alcoholic beverage                                              | 9                                          |
| Displaying your current relationship status                                                           | 5                                          |

## REFERENCES

1. Gonzalez N. Facebook Marketing Statistics [Internet]. <http://www.checkfacebook.com>. [cited 2012 Oct 25]. Available from: <http://www.checkfacebook.com/>
2. Sandars J, Homer M, Pell G, Croker T. Web 2.0 and social software: the medical student way of e-learning. *Med Teacher* 2008, 30:308-312
3. Thompson LA, Dawson K, Ferdig R, Black EW, Boyer J, Coutts J, et al. The Intersection of Online Social Networking with Medical Professionalism. *J Gen Int Med*. 2008;**23**:954–7.
4. Hawn C. Take Two Aspirin And Tweet Me In The Morning: How Twitter, Facebook, And Other Social Media Are Reshaping Health Care. *Health Affairs*. 2009;**28**:361–8.
5. McGowan BS, Wasko M, Vartabedian BS, Miller RS, Freiherr DD, Abdolrasulnia M. Understanding the Factors That Influence the Adoption and Meaningful Use of Social Media by Physicians to Share Medical Information. *J Med Internet Res*; 2012, e117.
6. Glick PL, Yamout SZ. Social media for surgeons: Understand it, embrace it, and leverage it for our profession and our patient. *Surgery*. 2012;**152**:941–2.
7. Jain SH. Practicing medicine in the age of Facebook. *N Engl J Med*. 2009 Aug 13;**361**:649–51.
8. Lagu T, Greysen SR. Physician, monitor thyself: professionalism and accountability in the use of social media. *J Clin Ethics*. 2011;**22**:187–90.
9. Cain J. Online social networking issues within academia and pharmacy education. *Am J Pharm Educ*. 2008;**72**:10.
10. Kashani R, Burwash S, Hamilton A. To be or not to be on Facebook: this is the question. *Occup Ther Now*. 2010;**12**:19–22.
11. Gorrindo T, Gorrindo PC, Groves JE. Intersection of Online Social Networking with Medical Professionalism: Can Medicine Police the Facebook Boom? *J Gen Intern Med* . 2008;**23**:2155–5.
12. Feldman MD. From the Editors' Desk: What You Don't Know Could Hurt You. *J Gen Int Med*. 2010;**25**:1139–9.
13. Giordano C, Giordano C. Health professions students' use of social media. *J Allied Health*. 2011;**40**:78–81.

14. Schulman CI, Kuchkarian FM, Withum KF, Boecker FS, Graygo JM. Influence of social networking websites on medical school and residency selection process. *Postgraduate Medical Journal*. 2012, epub PMID 23139411
15. MacDonald J, Sohn S, Ellis P. Privacy, professionalism and Facebook: a dilemma for young doctors. *Med Educ*. 2010;**44**:805–13.
16. Golden JB, Sweeny L, Bush B, Carroll WR. Social networking and professionalism in otolaryngology residency applicants. *The Laryngoscope*. 2012;**122**:1493–6.
17. Chretien KC, Greysen SR, Chretien J-P, Kind T. Online posting of unprofessional content by medical students. *JAMA: The Journal of the American Medical Association*. 2009;**302**:1309–15.
18. Chretien KC, Goldman EF, Beckman L, Kind T. It's your own risk: medical students' perspectives on online professionalism. *Acad Med*. 2010;**85**:S68–71.
19. Karl, K. & Peluchette, J. (2009). Facebook follies: who suffers most? In C. Romm Livermore & K. Setzekorn (Eds.), *Social Networking Communities and E-Dating Services: Concepts and Implications* (pp. 212-224). Hershey, PA: IGI Global.
20. Peluchette J, Karl K. Social networking profiles: an examination of student attitudes regarding use and appropriateness of content. *Cyberpsychol Behav*. 2008;**11**:95–7.
21. Karl, K. & Peluchette, J. (2008). Students' postings on Facebook profiles: "What were they thinking?!". *Proceedings of 2008 International Academy of Management and Business* (pp. 1-15). San Diego, California
22. Karl K, Peluchette J, Schlagel C. A Cross-Cultural Examination of Student Attitudes and Gender Differences in Facebook Profile Content. *International Journal of Virtual Communities and Social Networking*. 2010;**2**:11-31.
23. Christofides E, Muise A, Desmarais S. Information Disclosure and Control on Facebook: Are They Two Sides of the Same Coin or Two Different Processes? *CyberPsychology & Behavior*. 2009;**12**:341–5.
24. Newman MW, Lauterbach D, Munson SA. It's not that I don't have problems, I'm just not putting them on Facebook: challenges and opportunities in using online social networks for health. *Proceedings of the ACM 2011 conference on Computer Supported Cooperative Work*, p.341-350.
25. Moore K. The influence of personality on Facebook usage, wall postings, and regret. *Computers in Human Behavior*, 2012;**28**:267–274.
26. White J, Brownell K, Lemay J-F, Lockyer JM. "What do they want me to say?" The

- 1  
2  
3 hidden curriculum at work in the medical school selection process: a qualitative  
4 study. *BMC Med Educ.* 2012;**12**:17.  
5  
6  
7 27. Kind T, Genrich G, Sodhi A, Chretien KC. Social media policies at US medical  
8 schools. *Med Educ Online.* 2010;15.  
9  
10 28. Shore R, Halsey J, Shan K, Crigger B-J, Douglas SP. Report of the AMA Council  
11 on Ethical and Judicial Affairs: Professionalism in the Use of Social Media. *J Clin*  
12 *Ethics.* 2011;**22**:165–72.  
13  
14 29. Guseh JS, Brendel RW, Brendel DH. Medical professionalism in the age of online  
15 social networking. *J Med Ethics.* 2009;**35**:584–6.  
16  
17  
18 30. Canadian Medical Association. Social media and Canadian physicians issues and  
19 rules of engagement [Internet]. Canadian Medical Association. 2012 [cited 2012  
20 Dec 9]. pages 1–3. Available from: [http://Social media and Canadian physicians -](http://Social media and Canadian physicians - issues and rules of engagement)  
21 [issues and rules of engagement](http://Social media and Canadian physicians - issues and rules of engagement)  
22  
23  
24 31. Australian Medical Association. Social media and the medical profession: a guide  
25 to online professionalism for medical practitioners and medical students.  
26 Australian Medical Association; 2010; p.1–14.  
27  
28 32. British Medical Association. Using social media: practical and ethical guidelines  
29 for doctors and medical students. British Medical Association; 2012, p.1–8.  
30  
31 33. Doctors' use of social media. General Medical Council; 2012, p.1–6.  
32  
33 34. Mostaghimi A, Crotty BH. Professionalism in the digital age. *Ann Intern Med.*  
34 2011;**154**:560–2.  
35  
36 35. George DR, Green MJ. Beyond Good and Evil: Exploring Medical Trainee Use of  
37 Social Media. *Teaching and Learning in Medicine.* 2012;**24**:155–7.  
38  
39 36. Gray K, Annabell L, Kennedy G. Medical students' use of Facebook to support  
40 learning: Insights from four case studies. *Med Teach.* 2010;**32**:971–6  
41  
42 37. White J, Sharma N. Podcasting: a technology, not a toy. *Adv in Health Sci Educ.*  
43 2012;**17**:601-603.  
44  
45 38. Greysen SR, Kind T, Chretien KC. Online Professionalism and the Mirror of Social  
46 Media. *J Gen Intern Med.* 2010;**25**:1227–9.  
47  
48  
49  
50  
51  
52  
53  
54  
55  
56  
57  
58  
59  
60



1  
2  
3  
4  
5  
6  
7  
8  
9  
10  
11  
12  
13  
14  
15  
16  
17  
18  
19  
20  
21  
22  
23  
24  
25  
26  
27  
28  
29  
30  
31  
32  
33  
34  
35  
36  
37  
38  
39  
40  
41  
42  
43  
44  
45  
46  
47  
48  
49  
50  
51  
52  
53  
54  
55  
56  
57  
58  
59  
60

**Title**

“Have you seen what’s on Facebook?” The use of social networking software by healthcare professions students

---

**Authors**

J White, P Kirwan, K Lai, J Walton, S Ross.

**Affiliations**

J White, Associate Professor, Department of Surgery, University of Alberta.

P Kirwan, Research Assistant, Department of Surgery, University of Alberta.

K Lai, Medical Student, Department of Family Medicine, University of Alberta.

J Walton, Assistant Professor, Department of Pediatrics, University of Alberta.

S Ross, Assistant Professor, Department of Family Medicine, University of Alberta.

**Corresponding Author****Dr Jonathan White**

Address: Room 202 Community Services Centre, Royal Alexandra Hospital,  
10240 Kingsway Avenue, Edmonton AB T5H 3V9, Canada

Email: jswhite1@ualberta.ca

Phone: (780) 735-5147

Fax: (780) 735-5459

Formatted: Right: 0.25"

1

### Competing Interest Declaration

"All authors have completed the Unified Competing Interest form at [www.icmje.org/coi\\_disclosure.pdf](http://www.icmje.org/coi_disclosure.pdf) (available on request from the corresponding author) and declare that (1) [initials of relevant authors] have support from [name of company] for the submitted work; (2) [initials of relevant authors] have [no or specified] relationships with [name of companies] that might have an interest in the submitted work in the previous 3 years; (3) their spouses, partners, or children have [specified] financial relationships that may be relevant to the submitted work; and (4) [initials of relevant authors] have no [or specified] non-financial interests that may be relevant to the submitted work."

### Exclusive Licence Statement

"The Corresponding Author has the right to grant on behalf of all authors and does grant on behalf of all authors, an exclusive licence (or non exclusive for government employees) on a worldwide basis to the BMJ Publishing Group Ltd and its Licensees to permit this article (if accepted) to be published in BMJ editions and any other BMJ PGL products and sublicences to exploit all subsidiary rights, as set out in our licence (<http://resources.bmj.com/bmj/authors/checklists-forms/licence-for-publication>)."

### Contributorship statement

All authors are justifiably credited with authorship, according to the authorship criteria. In detail:

Jonathan White: study conception and design, analysis and interpretation of data, revising the article, final approval of the version to be published

Paul Kirwan Wallace: data collection, analysis and interpretation of data, interviewer, input to drafts of the article, final approval of the version to be published

Krista Lai: analysis and interpretation of data, input to drafts of the article, final approval of the version to be published

Jennifer Walton: analysis and interpretation of data, input to drafts of the article, final approval of the version to be published

Shelley Ross: study conception and design, analysis and interpretation of data, revising the article, final approval of the version to be published

### Acknowledgements

Funding for this project was provided University of Alberta Faculty of Medicine and Dentistry summer studentships in 2011 and 2012. We would like to acknowledge the assistance of Ms Shannon Erichsen with this project.

### Ethical Approval

Ethics approval was obtained from the University of Alberta Health Research Ethics Board (ref: 22787).

Formatted: Right: 0.25"

1  
2  
3  
4  
5  
6  
7  
8  
9  
10  
11  
12  
13  
14  
15  
16  
17  
18  
19  
20  
21  
22  
23  
24  
25  
26  
27  
28  
29  
30  
31  
32  
33  
34  
35  
36  
37  
38  
39  
40  
41  
42  
43  
44  
45  
46  
47  
48  
49  
50  
51  
52  
53  
54  
55  
56  
57  
58  
59  
60**ABSTRACT (316 words)**

**Objective.** The use of social networking software has become ubiquitous in our society. The aim of this study was to explore the attitudes and experiences of healthcare professional students using Facebook at our school, and to determine if there is a need for development of policy to assist students with utilizing this technology during their professional education.

**Design.** A mixed-methods approach was employed, using semi-structured interviews to identify important themes which were further explored using an online survey. A combination of descriptive statistics and thematic analysis was used to analyse the data obtained.

**Setting & Participants:** Students of Medicine, Nursing, Pharmacy, Speech & Language Pathology, Occupational Therapy, Physical Therapy, Dentistry, Dental Hygiene and Medical Laboratory Science at a large North American university.

**Results.** 14 interviews were analysed in-depth, and 682 healthcare professions students responded to the survey, an approximate 17% response rate. 93% reported current Facebook use. Themes identified included: patterns of use and attitudes to friendship, attitudes to online privacy, breaches of professional behaviour on Facebook, and attitudes to guidelines relating to Facebook use. A majority considered posting of the following material unprofessional: use of alcohol and drugs, crime, obscenity, patient/client information, sexual content and nudity and criticism of others. 44% reported seeing such material posted by a colleague, and 27% reported posting such

Formatted: Right: 0.25"

3

1  
2  
3  
4  
5  
6  
7  
8  
9 material themselves. A majority of participants agreed that guidelines for Facebook use  
10 would be beneficial.  
11

12  
13 **Conclusions.** This study demonstrates that the use of social networking software is  
14 widespread amongst healthcare students at our school, and highlights the challenges  
15 which accompany the use of this new technology. We believe that studies such as this  
16 are important in understanding the pedagogy and practices of Facebook use and in  
17 helping students navigate the dilemmas associated with becoming 21<sup>st</sup> century  
18 healthcare professionals.  
19  
20  
21  
22  
23  
24  
25  
26  
27  
28  
29  
30  
31  
32  
33  
34  
35  
36  
37  
38  
39  
40  
41  
42  
43  
44  
45  
46  
47  
48  
49  
50  
51  
52  
53  
54  
55  
56  
57  
58  
59  
60

Formatted: Right: 0.25"

4

1  
2  
3  
4  
5  
6  
7  
8  
9  
10  
11  
12  
13  
14  
15  
16  
17  
18  
19  
20  
21  
22  
23  
24  
25  
26  
27  
28  
29  
30  
31  
32  
33  
34  
35  
36  
37  
38  
39  
40  
41  
42  
43  
44  
45  
46  
47  
48  
49  
50  
51  
52  
53  
54  
55  
56  
57  
58  
59  
60

### *Article focus*

The use of social networking software has become ubiquitous in our society. Healthcare practitioners and their students have struggled to integrate this new technology with the expectations of professional behaviour.

### *Key messages*

- Social networking software is widespread amongst healthcare students at our school. This paper highlights the challenges which accompany the use of this new technology, including the posting of unprofessional and inappropriate material online.
- We discuss the dilemma of students wanting to share information in a mixed social network in order to remain popular, while also being wary about how material shared will make them appear.
- We suggest that guidelines for the use of social networking software may help our students deal with this dilemma more effectively.

### *Strengths and limitations of this study*

Although ~~Although~~ the survey element of this study had a relatively low response rate, it did gather data from a large number of students training in several different health professions, and we believe it provides an interesting snapshot of attitudes to social networking software at our school. -The low response rate to the survey means that we cannot exclude the possibility of response bias and that we cannot easily generalize our findings to the whole population. Given these limitations, we believe that we and is

Formatted: Right: 0.25"

5

1  
2  
3  
4  
5  
6  
7  
8  
9 possibly subject to response bias, we believe we have shown that use of Facebook ~~is~~ is  
10 widespread among the healthcare students we studied, and that we have identified  
11 important areas for education policymakers to focus on.  
12  
13  
14  
15  
16  
17  
18  
19  
20  
21  
22  
23  
24  
25  
26  
27  
28  
29  
30  
31  
32  
33  
34  
35  
36  
37  
38  
39  
40  
41  
42  
43  
44  
45  
46  
47  
48  
49  
50  
51  
52  
53  
54  
55  
56  
57  
58  
59  
60

For peer review only

Formatted: Right: 0.25"

6

## INTRODUCTION

In recent years, the use of social networking websites such as Facebook, MySpace and Twitter has become ubiquitous in ~~our many western countries~~society. At the time of writing, there are over 18.5 million Facebook users in Canada alone, and over 70% of the Canadian population possesses a Facebook account [1]. Facebook use is highly prevalent among medical students: at least 60% of medical students in the US, and over 70% of medical students in the UK are active users [2,3].

A number of authors have written that social networking software has the potential to revolutionize healthcare by increasing interaction between providers and clients and facilitating the free flow of information relating to healthcare [43]. A recent study among primary care physicians and oncologists demonstrated that a majority of those studied used social networking software to keep abreast of new developments in their field and to share knowledge [54]. A recent series of articles has called for surgeons to embrace social media as well [65].

Other authors have called for caution in healthcare providers engaging with social networking software. The software encourages users to share the events of their lives; for individuals training to enter the health professions, such sharing may be in conflict with requirements for confidentiality and professionalism of the profession for which they are training [76]. Some have suggested that Facebook will lead to an unacceptable blurring of the professional and the personal, and make it difficult to maintain proper

Formatted: Right: 0.25"

7

1  
2  
3  
4  
5  
6  
7  
8  
9 | boundaries and professional principles [8,97,8]. Other authors have gone further and  
10 | suggested that it may be best for healthcare providers not to engage in social  
11 |  
12 | networking online [109], or that Facebook use should be monitored or policed in some  
13 |  
14 | way [1,120,44].  
15 |

16  
17  
18 | This study grew out of a discussion within our medical school about our own students'  
19 | use of Facebook, based on a number of incidents in which we thought our students  
20 | could have used Facebook more appropriately. This led to a debate about how (or  
21 | indeed if) we should advise our students about using such social networking software.  
22 |  
23 | We decided to focus on Facebook use instead of Twitter or MySpace, as this has been  
24 | shown to be the most widely-adopted form of social networking software at the moment  
25 |  
26 | [2,65,132,143]. Most other studies on online social networking in healthcare education  
27 | have focused on medical students, but we decided to sample a larger population to  
28 | obtain a broad snapshot of the use of Facebook in all of our healthcare faculties at our  
29 | school.  
30 |  
31 |  
32 |  
33 |  
34 |  
35 |  
36 |

37  
38  
39 | The aim of this study was to explore the attitudes and experiences of healthcare  
40 | professional students using Facebook at our university, with the aim of determining if  
41 | there is a need for development of policy or guidelines to assist students with integrating  
42 | this new technology as they progress in their education.  
43 |  
44 |  
45 |  
46 |  
47 |  
48 |  
49 |  
50 |  
51 |  
52 |

53  
54  
55 |  
56 |  
57 |  
58 |  
59 |  
60 |

Formatted: Right: 0.25"



1  
2  
3  
4  
5  
6  
7  
8  
9  
10  
11  
12  
13  
14  
15  
16  
17  
18  
19  
20  
21  
22  
23  
24  
25  
26  
27  
28  
29  
30  
31  
32  
33  
34  
35  
36  
37  
38  
39  
40  
41  
42  
43  
44  
45  
46  
47  
48  
49  
50  
51  
52  
53  
54  
55  
56  
57  
58  
59  
60

For peer review only

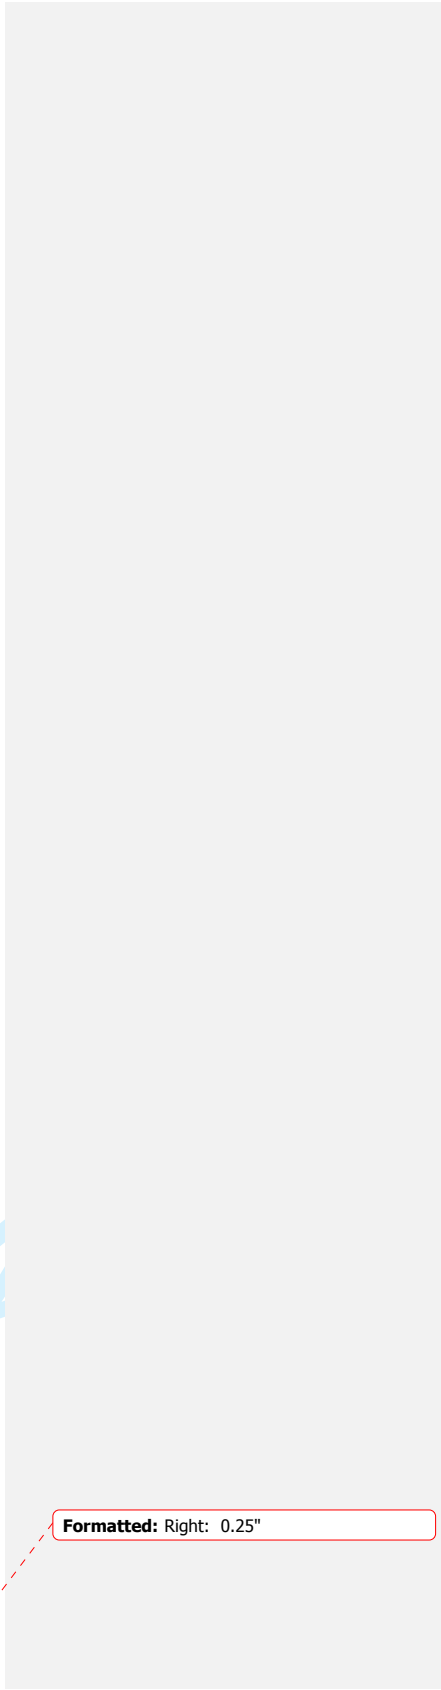

Formatted: Right: 0.25"

9

## METHODS

We employed a mixed-methods approach, conducting interviews with a small number of healthcare professions students first to identify important themes related to the use of social networking software, and then developing an online survey which was administered to a larger group.

Semi-structured interviews were conducted with 14 healthcare professions students at our university about participants' current use of social networking services. Interview questions were developed by the authors after a review of the literature ([Appendix 1](#)). Convenience sampling was used [for recruitment of interview subjects](#): participants were contacted through email, inviting voluntary participation in an interview. Students in nursing, medicine, dentistry, pharmacy, dental hygiene, speech and language pathology, occupational therapy and physical therapy were included in the invitation email distribution list and a single reminder email was sent. There were no specific exclusion criteria. Consent was obtained in person by the interviewer. Interviews lasted 30-45 minutes, and were designed to elicit information about participants' current use of social networking software. Interviews were audio-recorded and transcribed by a research assistant; transcripts were then analyzed to identify common themes [using a simple thematic analysis approach](#).

Themes identified from interview data were used to construct an anonymous online survey ([Appendix 2](#)). Items included a range of single-best-choice, Likert-scale, ranking

Formatted: Right: 0.25"

10

1  
2  
3  
4  
5  
6  
7  
8  
9  
10  
11  
12  
13  
14  
15  
16  
17  
18  
19  
20  
21  
22  
23  
24  
25  
26  
27  
28  
29  
30  
31  
32  
33  
34  
35  
36  
37  
38  
39  
40  
41  
42  
43  
44  
45  
46  
47  
48  
49  
50  
51  
52  
53  
54  
55  
56  
57  
58  
59  
60

and free response items. All items were revised by testing with health professions students before the survey was distributed. ~~Convenience sampling was again employed, and~~ the survey was distributed by email to students in all of the healthcare professions listed above. Participants were contacted through email, inviting voluntary participation in the survey; participants who had been interviewed were free to respond to the survey too.

Descriptive statistics were used to describe responses to each question. Free-text responses were analyzed to identify common themes and representative quotations. This study reports our findings relating to students' use of Facebook, unprofessional behaviours observed online, and about the need for guidelines relating to social networking software for healthcare professionals. Ethics approval was obtained from the local Health Research Ethics Board.

## RESULTS

The study took place in fall 2011. We identified the following themes at interview: patterns of Facebook use, attitudes to friendship on Facebook, attitudes to online privacy, breaches of professional behaviour ~~posted~~ on Facebook (including use of alcohol and drugs, crime, obscenity, patient/client information, sexual content and nudity, criticism of others) and attitudes to guidelines relating to Facebook use.

A total of 682 students responded to the survey, a response rate of approximately 17% (estimated total number of students: 3984). The number of ~~students-respondents~~.

Formatted: Right: 0.25"

11

1  
2  
3  
4  
5  
6  
7  
8  
9 response rate and gender balance from fro each faculty was as follows: Medicine: 232,  
10 Nursing: 200, Pharmacy: 82, Speech & Language Pathology: 54, Occupational  
11 Therapy: 43, Physical Therapy: 24, Dentistry/Dental Hygiene 23, Medical Laboratory  
12 Science: 23 are shown in Table 1. Over 75% of respondents were aged 18-25, and the  
13 gender balance was 3.2:1 (521 females: 158 males). As expected, females  
14 outnumbered males in all the faculties sampled. In the following section, quotations from  
15 free-response items are presented to highlight particular themes identified, while  
16 percentages in brackets are used to indicate the proportion of respondents to the online  
17 survey who expressed agreement with a particular theme or statement observed.

18  
19  
20  
21  
22  
23  
24  
25  
26 Additional representative quotations are presented in Table 24.

27  
28  
29  
30 93% of respondents reported having a Facebook account; 76% described checking  
31 their account at least 2 times per day, with 39% checking at least 5 times a day. When  
32 asked “who is on your friend list?”, respondents indicated the following categories: other  
33 students 96%, previous work colleagues 73%, current work colleagues 44%, previous  
34 instructors 21%, current instructors 5%, previous patients/clients 2%, current  
35 patients/clients 0.3% .

36  
37  
38  
39  
40  
41  
42 Respondents were asked to consider the types of material that they would consider  
43 unprofessional in principle if posted to Facebook (Table 32). 99% of respondents  
44 agreed that it would be unprofessional to post images or text which could be used to  
45 identify a patient. 40% of respondents said it was unprofessional to post anything at all  
46 relating to a patient/client, even without identifying information.

47  
48  
49  
50  
51  
52  
53 Formatted: Right: 0.25"

54  
55  
56  
57  
58  
59  
60  
12

- 1  
2  
3  
4  
5  
6  
7  
8  
9  
10  
11 • *A girl I know openly posts "quotes of the day" from patients she works with in mental*  
12 *health. She does not say who said them, and they are funny, but since I work there*  
13 *too, the info is identifying. I think it crosses a line.*  
14  
15  
16

17  
18 Over 80% considered posts or images relating to the following activities unprofessional:  
19 illicit drug consumption, criminal activity, overt sexual content, partial nudity and  
20 condescending or superior behaviour. At least 50% considered the following  
21 unprofessional: critical comments about a teacher, drunkenness/excessive drinking,  
22 swearing, and obscene gestures. Less than 10% objected to posts or photos depicting  
23 drinking in moderation, and to posting current relationship status.  
24  
25  
26  
27  
28  
29

- 30  
31 • *Plenty of students in my class post pictures of heavy drinking, many swear or have*  
32 *inappropriate sexual innuendo in their status updates.*  
33  
34  
35

36  
37 44% of respondents described seeing material they considered unprofessional material  
38 which had been posted to Facebook by a colleague (153 responses). The most  
39 common specific examples given included criticism of teachers and programs (56  
40 instances), inappropriate photographs (47 instances), depictions of drunkenness (27),  
41 posts about patients (21) and negative comments about patients (13). Other examples  
42 included parties attended (9), swearing (8), references to sex (7), inappropriate posts  
43 about work (5), negative comments about other professions (5) and consumption of  
44 illegal drugs (3). There were also descriptions of errors, negative comments about co-  
45  
46  
47  
48  
49  
50  
51  
52

53 Formatted: Right: 0.25"  
54

55 | 13  
56  
57  
58  
59  
60

1  
2  
3  
4  
5  
6  
7  
8  
9 workers, inappropriate behaviour in uniform, nudity, criminal activity, obscene gestures,  
10 racist and sexist comments and pictures of a cadaver (1-2 of each).

- 14 • *I know a medical student who often posts complaints about her faculty and also*  
15 *personal patient information*

19  
20 27% of respondents admitted to posting material which, with hindsight, they now  
21 considered unprofessional (81 responses). The most common transgressions described  
22 were posting inappropriate pictures (15 instances), swearing (13), criticizing teachers  
23 and programs (9), drinking (9), posting comments open to misinterpretation (8) and  
24 parties (5). There were 3 instances of posting sexual content, 2 posts about patients  
25 and 1 example of expressing negative views about a patient.

- 32 • *I've wrote personal posts before that probably shouldn't have been posted.*

33  
34  
35  
36  
37 44% described having material posted about them which they felt made them look  
38 unprofessional (137 examples). The vast majority of these instances related to the  
39 posting of photographs online (106); the most common areas of concern related to  
40 alcohol consumption (39) and attending parties (15); there were also examples of nudity  
41 (4), sexual material (3) and information pertaining to a relationship (1). 18% of  
42 respondents reported that the posting of such material had made them consider  
43 withdrawing from the use of social networking software.  
44  
45  
46  
47  
48  
49  
50  
51  
52  
53  
54  
55  
56  
57  
58  
59  
60

Formatted: Right: 0.25"

14

1  
2  
3  
4  
5  
6  
7  
8  
9  
10  
11  
12  
13  
14  
15  
16  
17  
18  
19  
20  
21  
22  
23  
24  
25  
26  
27  
28  
29  
30  
31  
32  
33  
34  
35  
36  
37  
38  
39  
40  
41  
42  
43  
44  
45  
46  
47  
48  
49  
50  
51  
52  
53  
54  
55  
56  
57  
58  
59  
60

- *People have posted hilarious photos from parties and other events some of which depict me as being intoxicated but once again I'm hoping that due to privacy settings the general public cannot see these.*

As a group, respondents were ambiguous about posting material on Facebook. Some students considered it intrusive that faculty should even be enquiring about their Facebook use, as they considered this too personal a topic for discussion. Others expressed concern that faculty's expectations around their online activities were unreasonable. Others took the view that they should be able to post what they like as long as they could control who has access.

- *Just because we are in a health care profession does not mean that we do not have freedom of speech.*

Students expressed the view that posting material to Facebook was associated with some risk to their current position and future prospects.

- *I am aware that my behaviour in all domains affects my reputation, so I am careful about who I am seen with and what I do.*

Many students described censoring themselves and removing material they had posted or been tagged in previously, or requesting to have their name removed from photos posted by other users.

Formatted: Right: 0.25"

15

- 1  
2  
3  
4  
5  
6  
7  
8  
9 • *I went through my Facebook photos and took down the photos I had posted with*  
10 *me in party pictures from my first undergrad degree. If I even looked drunk or*  
11 *questionable, or if the party had a funny, (but inappropriate theme) then I took*  
12 *those pictures down as well. I don't generally post a lot of comments, and none*  
13 *that I regret, but a picture is still worth a thousand words.*  
14  
15  
16  
17  
18  
19

20 98% of respondents described having altered the privacy settings of their Facebook  
21 account on at least one occasion; the reasons given for this included protection from  
22 strangers 99%, not trusting Facebook 62%, risk of viewing by potential employers 52%,  
23 advice from peers 30%, and advice from instructors 17%.  
24  
25  
26  
27  
28

- 29  
30 • *I don't really understand the privacy settings, so I just made them strict, just in case.*  
31  
32 • *I don't post anything on Facebook that could compromise me for work in any way.*  
33  
34

35 Lastly, respondents were asked about the use of guidelines relating to the use of social  
36 networking software in health professions education. Many were unfamiliar with existing  
37 guidelines (43%); only 15% agreed that existing guidelines were adequate. A majority  
38 agreed that guidelines would be beneficial: 79% agreed that others would benefit, and  
39 62% stated they would benefit personally.  
40  
41  
42  
43  
44

- 45  
46  
47 • *There are certain guidelines that I think any professional or role model should follow:*  
48 *no photos of inappropriate conduct (nudity, heavy drinking, sexual content, etc),*  
49 *patients/clients should not be added as friends or be able to view photos,*  
50  
51  
52

53 Formatted: Right: 0.25"  
54

55 | 16  
56  
57  
58  
59  
60



1  
2  
3  
4  
5  
6  
7  
8  
9 *confidential information remains confidential.. otherwise, if people are stupid enough*  
10 *to jeopardize their profession by posting something on facebook, they should deal*  
11 *with the consequences (losing a current or potential job, etc)*  
12  
13  
14  
15  
16  
17

## 18 **DISCUSSION**

20 This study demonstrates that the use of social networking software is widespread  
21 amongst students in the healthcare professions at our university and highlights some of  
22 the dilemmas which accompany the use of this new technology.  
23  
24  
25  
26  
27

28  
29 There was widespread agreement that posting material that can identify a patient/client  
30 should be considered unprofessional, as should material relating to drugs, sex, nudity,  
31 drunkenness, crime and obscenity. A majority also considered it unprofessional to post  
32 critical comments about teachers/programs and posts which could be considered  
33 condescending. Despite these stated understandings, nearly half of the students we  
34 studied reporting seeing their colleagues posting unprofessional material on Facebook,  
35 and over a quarter reported posting such material themselves. There was a wide range  
36 of transgressions reported, including criticism of teachers/programs, posting of  
37 inappropriate photographs, drunkenness, parties and swearing.  
38  
39  
40  
41  
42  
43  
44  
45  
46  
47

48 Our findings agree with other recent papers in the field. A study by Giordano &  
49 Giordano on healthcare students found that 77% of students used Facebook, and that  
50  
51  
52  
53  
54  
55  
56  
57  
58  
59  
60

Formatted: Right: 0.25"

17

1  
2  
3  
4  
5  
6  
7  
8  
9 use was inversely correlated with age [132]. This paper also showed that the main  
10 reasons for use were to maintain personal and professional connections, and to obtain  
11 up-to-date information. Thompson *et al* examined Facebook use in US medical students  
12 and residents, and found that 47% had Facebook accounts, and that only one-third had  
13 privacy settings set sufficiently high to prevent public access. A number of accounts  
14 contained material relating to substance abuse, sexism, racism, or lack of respect to  
15 patients [344]. A similar study on New Zealand physicians found that 65% had  
16 Facebook accounts, many of which contained public information relating to alcohol  
17 consumption, sexual orientation, and religion [15]. Similar findings have also been  
18 observed in US otolaryngology residents and British medical students [16]. In a recent  
19 study, 60% of US medical schools reported incidents relating to the use of social  
20 networking software, including breaches of patient confidentiality, profanity relating to  
21 the school, intoxication or substance abuse and nudity and sexual relationships. The  
22 majority of schools had issued a warning to the students involved, and a small number  
23 had dismissed a student over the issue [17].  
24  
25  
26  
27  
28  
29  
30  
31  
32  
33  
34  
35  
36  
37  
38

39 Our findings on student attitudes about posting unprofessional material are also  
40 supported by a study which used focus groups to explore the issue among US medical  
41 students [18]. As in our study, students generally agreed that it was unprofessional to  
42 breach patient confidentiality online, but there was less consensus about material  
43 relating to alcohol, drugs, sex and speaking poorly of others. This study also found that  
44 students expressed ambiguity about their use of Facebook, and “viewed online activity  
45 through a lens of personal risk”, considering how what they post could be used to harm  
46  
47  
48  
49  
50  
51  
52  
53  
54  
55  
56  
57  
58  
59  
60

Formatted: Right: 0.25"

18

1  
2  
3  
4  
5  
6  
7  
8  
9 them.

10  
11  
12 The types of material which our students considered problematic are congruent with  
13 other work outside healthcare describing the five main “Facebook Follies” which  
14 employers consider relevant when hiring new employees: negative attitudes to work,  
15 profanity, alcohol, drugs, and sexual activity [19]. Students also appear to be aware of  
16 the impact of their online activities, and have identified similar areas that they do not  
17 wish employers to see including drinking and drugs, photographs from parties,  
18 comments from friends, and comments about work [20-22].  
19  
20  
21  
22  
23  
24  
25  
26  
27

28 Christofides *et al* have observed that social networking software encourages people to  
29 disclose more personal information that they would otherwise do in order to remain  
30 popular within a social network, but also generates concern about information control  
31 and privacy [23]. Inappropriate pictures, especially of parties and drinking are a  
32 common cause of concern. As they write:  
33  
34  
35  
36  
37  
38

39 *(Online) identity ... is a social product created not only by what you share, but also by*  
40 *what others share and say about you... the people who are most popular are those*  
41 *whose identity construction is most actively participated in by others... (by) limiting*  
42 *access to personal information... the individual also... potentially reduces his or her*  
43 *popularity. [23]*  
44  
45  
46  
47  
48  
49  
50  
51  
52  
53  
54  
55  
56  
57  
58  
59  
60

Formatted: Right: 0.25"

19

1  
2  
3  
4  
5  
6  
7  
8  
9 We hypothesize that students are faced with a difficult dilemma: wanting to share  
10 information in a mixed personal/professional social network in order to remain popular,  
11 while also being wary about how the material they share will make them appear and  
12 who will see it. Others have also described this 'balancing act' between the need to  
13 share information and the desire to manage how one's self is presented [24]. This is a  
14 process of trial and error, and students express regret for the negative consequences of  
15 material posted previously [25]. We believe that this process is similar to other  
16 processes of conforming in healthcare education which have been described elsewhere  
17 [26].  
18  
19  
20  
21  
22  
23  
24  
25  
26  
27

28 Given the concerns over the use of Facebook by healthcare professions students, it is  
29 surprising to find that in a recent study, only 10% of US medical schools had a policy of  
30 any kind relating to social networking, and only 5 of the 132 schools studied provided  
31 advice on how students could avoid posting inappropriate content [27]. The American  
32 Medical Association has recently issued a report on professionalism in the use of social  
33 media [28], and a number of other organizations have suggested guidelines for  
34 physicians using social networking sites [29-33], but so far there is no generally-  
35 accepted policy for students of the health professions.  
36  
37  
38  
39  
40  
41  
42  
43  
44

45 Some have gone so far as to suggest we need to "divorce" the personal from the  
46 professional online, creating separate Facebook identities with "dual-citizenship" [34].

47 We believe that such concerns about Facebook use by healthcare professionals may be  
48 excessive and that social networking software is not dangerous or something to be  
49  
50  
51  
52  
53  
54  
55  
56  
57  
58  
59  
60

Formatted: Right: 0.25"

20

1  
2  
3  
4  
5  
6  
7  
8  
9  
10  
11  
12  
13  
14  
15  
16  
17  
18  
19  
20  
21  
22  
23  
24  
25  
26  
27  
28  
29  
30  
31  
32  
33  
34  
35  
36  
37  
38  
39  
40  
41  
42  
43  
44  
45  
46  
47  
48  
49  
50  
51  
52  
53  
54  
55  
56  
57  
58  
59  
60

feared, policed, or banned [35]. Others have shown that both students and educators are struggling to integrate this new technology into our existing practices of teaching and learning [36]. Online technologies are simply tools which are neither inherently good nor bad [3,36,37]; in some ways, social networking technologies act as a “mirror” which reflects all of our activities, including some activities we would rather not show to the world [38].

Our study was limited in several areas. Although the survey element of this study had a relatively low response rate, it did gather data from a large number of students training in several different health professions, and we believe it provides an interesting snapshot of attitudes to social networking software at our school across a number of different faculties. The low response rate to the survey means that we cannot exclude the possibility of response bias and that we cannot easily generalize our findings to the whole population. Given these limitations, we believe that we have shown that use of Facebook is widespread among the healthcare students we studied, and that we have identified areas for education policymakers to focus on.

~~Firstly, we estimated the response rate to the online survey at about 17%. This is relatively low, although the total number of responses is higher than most previous studies in this area. Secondly, response bias is likely: non-users of social networking software would probably be less likely to respond to a survey about Facebook, and would have less strong opinions about its use. Despite these limitations, we believe we have shown that use of Facebook is widespread among healthcare students, and that we have identified important areas for education policymakers to focus on.~~

Formatted: Right: 0.25"

21

1  
2  
3  
4  
5  
6  
7  
8  
9  
10  
11 We believe that studies such as this are important in exploring and understanding the  
12 pedagogy and practices of Facebook use and help students navigate the dilemmas  
13 associated with becoming 21st century healthcare professionals.  
14  
15  
16  
17  
18  
19  
20  
21  
22  
23  
24  
25  
26  
27  
28  
29  
30  
31  
32  
33  
34  
35  
36  
37  
38  
39  
40  
41  
42  
43  
44  
45  
46  
47  
48  
49  
50  
51  
52  
53  
54  
55  
56  
57  
58  
59  
60

For peer review only

Formatted: Right: 0.25"

22

1  
2  
3  
4  
5  
6  
7  
8  
9  
10  
11  
12  
13  
14  
15  
16  
17  
18  
19  
20  
21  
22  
23  
24  
25  
26  
27  
28  
29  
30  
31  
32  
33  
34  
35  
36  
37  
38  
39  
40  
41  
42  
43  
44  
45  
46  
47  
48  
49  
50  
51  
52  
53  
54  
55  
56  
57  
58  
59  
60

**Disclosures**

*Disclaimers*

None

*Previous presentations*

Previously presented at the 2012 Canadian Conference on Medical Education and published in abstract form as:

Facebook Use By Healthcare Students And Faculty: Do We Need Guidelines For Online Professionalism? P Kirwan, J White, S Ross. *Medical Education* 2012; 46 (Suppl. 1): 53

For peer review only

Formatted: Right: 0.25"

23

1  
2  
3  
4  
5  
6  
7  
8  
9  
10  
11  
12  
13  
14  
15  
16  
17  
18  
19  
20  
21  
22  
23  
24  
25  
26  
27  
28  
29  
30  
31  
32  
33  
34  
35  
36  
37  
38  
39  
40  
41  
42  
43  
44  
45  
46  
47  
48  
49  
50  
51  
52  
53  
54  
55  
56  
57  
58  
59  
60

|

|

For peer review only

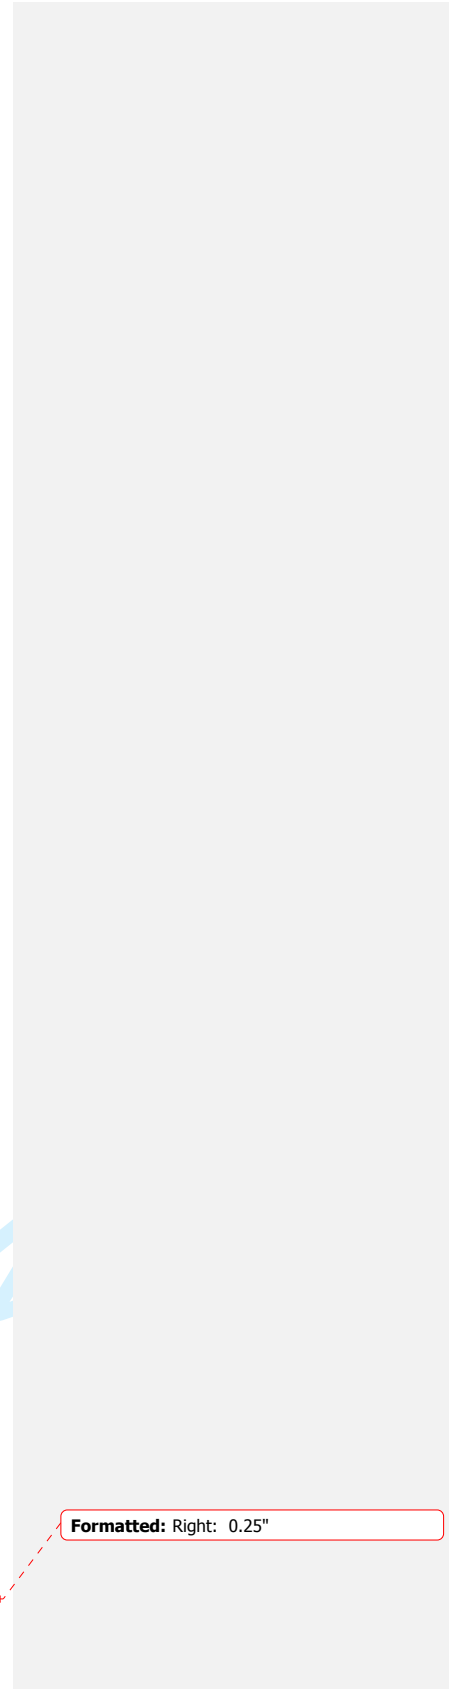

Formatted: Right: 0.25"

24



Table 1. Respondents to the online survey

| Faculty                     | Number of respondents to the online survey | Approx response rate (%) | Female:male ratio |
|-----------------------------|--------------------------------------------|--------------------------|-------------------|
| Medicine                    | 232                                        | 33                       | 58:42             |
| Nursing                     | 200                                        | 15                       | 95:5              |
| Pharmacy                    | 82                                         | 16                       | 73:27             |
| Speech & Language Pathology | 54                                         | 24                       | 94:6              |
| Occupational Therapy        | 43                                         | 11                       | 81:19             |
| Physical Therapy            | 24                                         | 5                        | 83:17             |
| Dentistry & Dental Hygiene  | 24                                         | 8                        | 61:39             |
| Medical Laboratory Science  | 23                                         | 20                       | 78:22             |
| Total                       | 682                                        | 17                       | 77:23             |

Formatted Table

Formatted: Right: 0.25"

25

Table 4.2. Representative Quotations

|                                              |                                                                                                                                                                                                                                                                                                                                                                                                                                                                                                                                                                                                                                                                                                                                                                                                                                                                                                                                                                                            |
|----------------------------------------------|--------------------------------------------------------------------------------------------------------------------------------------------------------------------------------------------------------------------------------------------------------------------------------------------------------------------------------------------------------------------------------------------------------------------------------------------------------------------------------------------------------------------------------------------------------------------------------------------------------------------------------------------------------------------------------------------------------------------------------------------------------------------------------------------------------------------------------------------------------------------------------------------------------------------------------------------------------------------------------------------|
| Patient confidentiality                      | <p>Disclosing confidential information about a patient to the general public is never permissible.</p> <p>One fellow student ... described the age of the patient, gender, and exactly what injuries they sustained in detail ... she did not disclose the name of this patient, but if my Grandma had an accident and was taken to this small rural hospital last night, it would not be hard to figure out that was who she was talking about. If you want to "debrief" to your friends on a one to one level about what you saw or experienced that it is fine. But putting it up as your "status" is inappropriate and not necessary. She was doing it so that all the other non-nurses on her friends list can see what a cool job she has. When people say they had, "the worst patient ever today", or when they discuss "helped deliver a baby in the front lobby of the hospital today".... I know if that had been me I would not want someone posting it all over Facebook.</p> |
| Activities considered unprofessional         | <p>Many students post pictures of them partying on the weekend, which could generate negative opinions about the healthcare profession because it is not the behavior expected of a professional.</p>                                                                                                                                                                                                                                                                                                                                                                                                                                                                                                                                                                                                                                                                                                                                                                                      |
| Unprofessional material observed from others | <p>A lot of nursing students share their frustrations of the faculty on Facebook, and will tell positive stories about their time at clinical.</p> <p>My most appalling example is photos of a peer with a cadaver that were posted on Facebook.</p>                                                                                                                                                                                                                                                                                                                                                                                                                                                                                                                                                                                                                                                                                                                                       |
| Unprofessional material posted by self       | <p>I have unprofessional pictures on Facebook, and don't see any conflict with this in my professional life as a soon to be registered nurse</p> <p>The odd time this has happened has been when I've been intoxicated.</p> <p>In my first career, around 5 years ago (when FB was relatively new), I posted on a colleagues wall asking about a client. I was asking in a caring manner, but still should not have. Lesson learned. Now I do not have work colleagues on my FB nor would I write about a client.</p> <p>Something inappropriate was said in class by a professor and I joined a thread poking fun at that professor. I did remove the post when I realized what I had done</p>                                                                                                                                                                                                                                                                                            |
| Unprofessional material affecting self       | <p>I'm sure a lot of the pictures of me during my undergrad could be considered unprofessional.</p>                                                                                                                                                                                                                                                                                                                                                                                                                                                                                                                                                                                                                                                                                                                                                                                                                                                                                        |
| Freedom of speech                            | <p>If patients and clients have the right to have their personal lives and information kept from being disclosed, then me being a health professional - I also have a personal life. One that is enjoyed and should be able to be enjoyed freely without interference or judgment.</p>                                                                                                                                                                                                                                                                                                                                                                                                                                                                                                                                                                                                                                                                                                     |

Formatted: Right: 0.25"

|                         |                                                                                                                                                                                                                                                                                                                                                                                                                                                                                                                                                                                                                                                                                                                       |
|-------------------------|-----------------------------------------------------------------------------------------------------------------------------------------------------------------------------------------------------------------------------------------------------------------------------------------------------------------------------------------------------------------------------------------------------------------------------------------------------------------------------------------------------------------------------------------------------------------------------------------------------------------------------------------------------------------------------------------------------------------------|
| Risk                    | <p>Facebook is tons of fun... but a scary place! Way too much info floating around. People can make things up, or post photos of you without your consent.</p> <p>I think one has to be very careful with Facebook, and often I don't think people realize the negative affects it can have.</p> <p>Many people can misjudge a post on a social media site or take it out of context, resulting in a false negative image for the user.</p>                                                                                                                                                                                                                                                                           |
| Control                 | <p>I have no control over who snaps a picture of me doing something in my personal life and posting them on Facebook.</p> <p>You have to be squeaky clean everywhere in life, or Facebook could be used to haunt you.</p> <p>A friend posted pictures of me and some of my other friends acting silly, and I was upset that she had not earlier asked for my consent or the consent of my friends who were against the pictures being posted, so i made her remove the pictures.</p> <p>There are photos of me being silly/drunk from earlier years of my life on Facebook, but I have untagged myself. There is nothing really bad because I would never let someone take a really unprofessional picture of me.</p> |
| Attitudes to guidelines | <p>I firmly support the idea of social media guidelines imparted by the university and/or professional licensing body.</p> <p>Some guidelines should be in place to set a standard but definitely not a list of "Don'ts" that would restrict our freedom</p> <p>Guidelines could help by making things more concrete, though in the end, I think things are up to one's professional judgment</p>                                                                                                                                                                                                                                                                                                                     |

Formatted: Right: 0.25"

Table 3. Types of material participants would consider unprofessional in principle if posted to Facebook  
Table 2.

| Online behaviour                                                                                      | Percentage classifying as 'unprofessional' |
|-------------------------------------------------------------------------------------------------------|--------------------------------------------|
| Posts that disclose information about a patient/client                                                | 99                                         |
| Posts depicting illicit drug consumption                                                              | 94                                         |
| Petty criminal activity                                                                               | 91                                         |
| Photos of a patient/client                                                                            | 91                                         |
| Posts involving overt sexual content                                                                  | 86                                         |
| Attitudes of superiority or condescending behaviour (assumed because of professional status)          | 73                                         |
| Posts containing partial nudity                                                                       | 82                                         |
| Obscene gestures in photos (middle finger, etc)                                                       | 72                                         |
| Status updates describing substantial alcohol consumption at a party                                  | 69                                         |
| Pictures of an individual clearly acting drunk                                                        | 68                                         |
| Endorsements of a pharmaceutical or health product without a conflict of interest disclosure          | 58                                         |
| Critical comments about a lecturer or preceptor                                                       | 69                                         |
| Swearing or foul language                                                                             | 60                                         |
| Critical comments of course material, your program, faculty, or the university                        | 49                                         |
| Posts describing an interaction with a patient/client, that do not reveal any identifying information | 40                                         |
| Making opinionated comments about controversial issues                                                | 22                                         |
| Displaying membership in online groups dealing with controversial issues                              | 17                                         |
| A picture of an individual having one alcoholic beverage                                              | 9                                          |
| Displaying your current relationship status                                                           | 5                                          |

Formatted: Right: 0.25"

28

1  
2  
3  
4  
5  
6  
7  
8  
9  
10  
11  
12  
13  
14  
15  
16  
17  
18  
19  
20  
21  
22  
23  
24  
25  
26  
27  
28  
29  
30  
31  
32  
33  
34  
35  
36  
37  
38  
39  
40  
41  
42  
43  
44  
45  
46  
47  
48  
49  
50  
51  
52  
53  
54  
55  
56  
57  
58  
59  
60

## REFERENCES

1. Gonzalez N. Facebook Marketing Statistics [Internet]. <http://www.checkfacebook.com>. [cited 2012 Oct 25]. Available from: <http://www.checkfacebook.com/>
2. ~~Gray K, Annabell L, Kennedy G. Medical students' use of Facebook to support learning: Insights from four case studies. Med Teach. 2010;32:971–6.~~ ~~Sandars J, Homer M, Pell G, Croker T. Web 2.0 and social software: the medical student way of e-learning. Med Teacher 2008. 30:308-312~~
3. Thompson LA, Dawson K, Ferdig R, Black EW, Boyer J, Coutts J, et al. The Intersection of Online Social Networking with Medical Professionalism. J Gen Int Med. 2008;23:954–7.
34. Hawn C. Take Two Aspirin And Tweet Me In The Morning: How Twitter, Facebook, And Other Social Media Are Reshaping Health Care. Health Affairs. 2009;28:361–8.
45. McGowan BS, Wasko M, Vartabedian BS, Miller RS, Freiherr DD, Abdolrasulnia M. Understanding the Factors That Influence the Adoption and Meaningful Use of Social Media by Physicians to Share Medical Information. J Med Internet Res; 2012, e117.
56. Glick PL, Yamout SZ. Social media for surgeons: Understand it, embrace it, and leverage it for our profession and our patient. Surgery. 2012;152:941–2.
67. Jain SH. Practicing medicine in the age of Facebook. N Engl J Med. 2009 Aug 13;361:649–51.
78. Lagu T, Greysen SR. Physician, monitor thyself: professionalism and accountability in the use of social media. J Clin Ethics. 2011;22:187–90.
89. Cain J. Online social networking issues within academia and pharmacy education. Am J Pharm Educ. 2008;72:10.
910. Kashani R, Burwash S, Hamilton A. To be or not to be on Facebook: this is the question. Occup Ther Now. 2010;12:19–22.
119. Gorrindo T, Gorrindo PC, Groves JE. Intersection of Online Social Networking with Medical Professionalism: Can Medicine Police the Facebook Boom? J Gen Intern Med . 2008;23:2155–5.
4412. Feldman MD. From the Editors' Desk: What You Don't Know Could Hurt You. J Gen Int Med. 2010;25:1139–9.
4213. Giordano C, Giordano C. Health professions students' use of social media. J

Formatted: Font: 12 pt

Formatted: Font: 12 pt

Formatted: Right: 0.25"

29

Allied Health. 2011;**40**:78–81.

- ~~43~~14. Schulman CI, Kuchkarian FM, Withum KF, Boecker FS, Graygo JM. Influence of social networking websites on medical school and residency selection process. Postgraduate Medical Journal. 2012, epub PMID 23139411
- ~~14.~~ Thompson LA, Dawson K, Ferdig R, Black EW, Boyer J, Coutts J, et al. The Intersection of Online Social Networking with Medical Professionalism. *J Gen Int Med.* 2008;**23**:054–7.
15. MacDonald J, Sohn S, Ellis P. Privacy, professionalism and Facebook: a dilemma for young doctors. *Med Educ.* 2010;**44**:805–13.
16. Golden JB, Sweeny L, Bush B, Carroll WR. Social networking and professionalism in otolaryngology residency applicants. *The Laryngoscope.* 2012;**122**:1493–6.
17. Chretien KC, Greysen SR, Chretien J-P, Kind T. Online posting of unprofessional content by medical students. *JAMA: The Journal of the American Medical Association.* 2009;**302**:1309–15.
18. Chretien KC, Goldman EF, Beckman L, Kind T. It's your own risk: medical students' perspectives on online professionalism. *Acad Med.* 2010;**85**:S68–71.
19. Karl, K. & Peluchette, J. (2009). Facebook follies: who suffers most? In C. Romm Livermore & K. Setzekorn (Eds.), *Social Networking Communities and E-Dating Services: Concepts and Implications* (pp. 212-224). Hershey, PA: IGI Global.
20. Peluchette J, Karl K. Social networking profiles: an examination of student attitudes regarding use and appropriateness of content. *Cyberpsychol Behav.* 2008;**11**:95–7.
21. Karl, K. & Peluchette, J. (2008). Students' postings on Facebook profiles: "What were they thinking?!" Proceedings of 2008 International Academy of Management and Business (pp. 1-15). San Diego, California
22. Karl K, Peluchette J, Schlagel C. A Cross-Cultural Examination of Student Attitudes and Gender Differences in Facebook Profile Content. *International Journal of Virtual Communities and Social Networking.* 2010;**2**:11-31.
23. Christofides E, Muise A, Desmarais S. Information Disclosure and Control on Facebook: Are They Two Sides of the Same Coin or Two Different Processes? *CyberPsychology & Behavior.* 2009;**12**:341–5.
24. Newman MW, Lauterbach D, Munson SA. It's not that I don't have problems, I'm just not putting them on Facebook: challenges and opportunities in using online social

Formatted: Right: 0.25"

30

1  
2  
3  
4  
5  
6  
7  
8  
9  
10  
11  
12  
13  
14  
15  
16  
17  
18  
19  
20  
21  
22  
23  
24  
25  
26  
27  
28  
29  
30  
31  
32  
33  
34  
35  
36  
37  
38  
39  
40  
41  
42  
43  
44  
45  
46  
47  
48  
49  
50  
51  
52  
53  
54  
55  
56  
57  
58  
59  
60

networks for health. Proceedings of the ACM 2011 conference on Computer Supported Cooperative Work, p.341-350.

25. Moore K. The influence of personality on Facebook usage, wall postings, and regret. *Computers in Human Behavior*, 2012;**28**:267–274.
26. White J, Brownell K, Lemay J-F, Lockyer JM. “What do they want me to say?” The hidden curriculum at work in the medical school selection process: a qualitative study. *BMC Med Educ*. 2012;**12**:17.
27. Kind T, Genrich G, Sodhi A, Chretien KC. Social media policies at US medical schools. *Med Educ Online*. 2010;15.
28. Shore R, Halsey J, Shan K, Crigger B-J, Douglas SP. Report of the AMACouncil on Ethical and Judicial Affairs: Professionalism in the Use of Social Media. *J Clin Ethics*. 2011;**22**:165–72.
29. Guseh JS, Brendel RW, Brendel DH. Medical professionalism in the age of online social networking. *J Med Ethics*. 2009;**35**:584–6.
30. Canadian Medical Association. Social media and Canadian physicians issues and rules of engagement [Internet]. Canadian Medical Association. 2012 [cited 2012 Dec 9]. pages 1–3. Available from: <http://Social media and Canadian physicians - issues and rules of engagement>
31. ~~Australian American~~ Medical Association. Social media and the medical profession: a guide to online professionalism for medical practitioners and medical students. Australian Medical Association; 2010; p.1–14.
32. British Medical Association. Using social media: practical and ethical guidelines for doctors and medical students. British Medical Association; 2012, p.1–8.
33. Doctors’ use of social media. General Medical Council; 2012, p.1–6.
34. Mostaghimi A, Crotty BH. Professionalism in the digital age. *Ann Intern Med*. 2011;**154**:560–2.
35. George DR, Green MJ. Beyond Good and Evil: Exploring Medical Trainee Use of Social Media. *Teaching and Learning in Medicine*. 2012;**24**:155–7.
36. ~~Gray K, Annabell L, Kennedy G. Medical students’ use of Facebook to support learning: Insights from four case studies. *Med Teach*. 2010;**32**:971–6~~
36. ~~Thompson LA, Black EW, Dawson K, Ferdig R, Black NP. *J Gen Intern Med*. 2008;**23**:2156.~~
37. White J, Sharma N. Podcasting: a technology, not a toy. *Adv in Health Sci Educ*.

Formatted: Indent: Left: 0", First line: 0", Space After: 10 pt, Line spacing: Multiple 1.15 li, Widow/Orphan control, Adjust space between Latin and Asian text, Adjust space between Asian text and numbers, Tab stops: Not at 0.44"

Formatted: Font: 11 pt

Formatted: Right: 0.25"

31

1  
2  
3  
4  
5  
6  
7  
8  
9 2012;**17**:601-603.

- 10  
11 38. Greysen SR, Kind T, Chretien KC. Online Professionalism and the Mirror of Social  
12 Media. J Gen Intern Med. 2010;**25**:1227–9.  
13  
14  
15  
16  
17  
18  
19  
20  
21  
22  
23  
24  
25  
26  
27  
28  
29  
30  
31  
32  
33  
34  
35  
36  
37  
38  
39  
40  
41  
42  
43  
44  
45  
46  
47  
48  
49  
50  
51  
52  
53  
54  
55  
56  
57  
58  
59  
60

For peer review only

Formatted: Right: 0.25"

|  
32



## Interview script

## “Are You on Facebook?”

First of all, thank you for agreeing to meet with me in order to take part in this study! Just to remind you, this study deals with the social networking site Facebook, and the role that it currently plays in healthcare professions education.

We have asked to meet with you in order to conduct an in-person interview, so that we can better understand your experiences as a user of Facebook, as well as your beliefs and attitudes surrounding its use in relation to the healthcare professions. We hope to learn about any factors that may have led you to begin, discontinue or refuse ever to use Facebook as a student or medical professional, and also understand any benefits or drawbacks that you might believe exist for those using this popular social networking site.

I also want to make you aware that this interview will be recorded and transcribed so that we are as accurate as possible in our data collection; however, your anonymity will be protected and your identity will in no way be associated with any of the answers that you provide.

Before we begin, please take your time to read the following information sheet and sign the consent form. By consenting to participate in this study you are allowing us to record and transcribe this interview as well as to analyze and, in the future, both publish and present the data we gather today.

Thank you.

Alright, let's begin:

- 1) Do you currently or have you ever had a personal Facebook account?
- 2) How often do you log on to Facebook? (Number of times per day, week, month, etc)
- 3) What would you say is the main purpose of your Facebook use (personal relationships, work relationships, staying in contact with family, sharing of educational information, etc.)?
- 4) Can you tell me what sorts of people are on your friends list on Facebook?
  - Family
  - Personal friends
  - Work colleagues
  - Fellow students
  - Teachers
  - Patients
  - Online friends I have never met in person
- 5) Do you think Facebook use has provided any benefits or opportunities to you as a student or professional other than personal/social communication?

Can you elaborate on that? (ask, if you feel it's necessary)

- 6) What about any motivating factors to use Facebook for educational purposes?

(Suggestions to use as prompts, possible examples: Inadequate classroom instruction, structure of teaching and assessment (piecing together individual work for a common exam), learning in different educational settings, tutorial group learning, etc.)

7) As a student/teacher, have you ever engaged with one of your teachers/students on Facebook?

8) As a student/teacher, have you ever engaged with other students or colleagues *at another university* through social networking sites? What was the nature or purpose of this communication?

9) As a student engaged in some kind of educational group on Facebook, have you or your fellow members ever invited or sought to involve any of your instructors? Why or why not?

10) As an instructor or preceptor in the medical field, have you ever sought to create a space for sharing information using social networking tools? Why or why not? Have students ever approached you about this matter or invited you to join them in some way on these sites?

11) What do you believe are some dangers that exist for professional members of the community using these social media websites?

12) Do you think that there are many people that agree with your opinions on Facebook use within the medical community or the student body? What about those who might oppose your views? Are there any particular demographics you think would support/oppose you?

13) In regards to any dangers or negative aspects you may have mentioned for Facebook use by healthcare professionals, do you feel the current guidelines or recommendations to protect users is adequate? If not, what kind of changes would you recommend?

14) What types of things would you recommend to include in a set of regulations that govern the appropriate use of sites like Facebook by students and medical professionals alike?

15) Do you have any other additional comments regarding your experiences as a user of Facebook?

Thank you once again for taking part in this study. Your responses to the questions I asked today will be invaluable to our ongoing research. As mentioned before, if you have any additional questions regarding the study please contact Dr. White or Dr. Ross.

Have a great day!

# Facebook in Healthcare Education

## Welcome Page and Consent

Facebook in Healthcare Education

Online Survey

For All Students, Instructors and Faculty Members in Health Professions Education at the University of Alberta

Thank you for taking the time to log on and complete this online survey!

This study deals with the social networking site Facebook, and the role that it currently plays in healthcare education.

The purpose of creating this survey was so that we can better understand your experiences as a user of Facebook, as well as your beliefs and attitudes surrounding its use in relation to the healthcare professions. We hope to learn about any factors that may have led you to begin, discontinue or refuse ever to use Facebook as a student or medical professional, and also understand any benefits or drawbacks that you might believe exist for those using this popular social networking site.

Please understand that by continuing beyond this point and completing this brief survey, you are acknowledging that you are aware your answers will be analyzed and, perhaps in the future, published as a way of presenting our findings. However, you can be certain that your anonymity will be protected and your identity will in no way be associated with any of the answers that you provide in this survey.

Thank you.

## Section I: Demographic Information

### 1. What is your age?

- 18-20
- 21-25
- 26-30
- 31-40
- 41-50
- 51-60
- Over 60

### 2. Sex:

- Male
- Female

## Facebook in Healthcare Education

### 3. What is your role/ title at the University?

- Student
- Professor/ lecturer
- Administrator
- Faculty assistant

Other (please specify)

### 4. What program are you affiliated with?

- Nursing
- Medicine
- Dentistry
- Dental Hygiene
- Pharmacy
- Medical Laboratory Science
- Occupational Therapy
- Physical Therapy
- Speech Language Pathology

Other (please specify)

## Section II: Facebook Use

### 5. Do you currently have a Facebook account?

- Yes
- No

## Section II: Facebook Use Continued

## Facebook in Healthcare Education

### 6. Approximately how often do you check your Facebook account?

- More than 10 times/day
- 5-10 times/day
- 2-4 times a day
- Once/day
- 2-3 times/week
- Once/week or less

### 7. How do you most often access Facebook?

- On a desktop computer
- On a laptop
- On my phone
- Other (please specify)

### 8. When you check your account, how long do you spend each time?

- 0-5 minutes
- 5-10 minutes
- 10-30 minutes
- 30-60 minutes
- More than 1 hour

### 9. How selective are you in accepting 'Friend Requests' on Facebook?

- I only accept requests from people I know well and family members
- I accept requests from people I have met in person a few times
- I accept requests from people I have only met once
- If I recognize their name or share a few mutual friends, I will accept them, even though we have never met in person
- I accept friend requests from people I have never met in person and don't really know

# Facebook in Healthcare Education

## 10. At the moment, who is on your Friends list on Facebook? (Please check all that apply)

- Undergraduate students
- Residents/postgraduate trainees
- Current instructors
- Previous instructors
- Current Work Colleagues
- Previous Work Colleagues
- Current Patients/Clients
- Previous Patients/Clients

## 11. If a patient/client sent you a friend request, would you accept?

- Yes
- No
- Maybe (please explain)

## 12. People use Facebook for many different purposes. To what extent do you use Facebook for the following purposes?

|                                                | Never                 | Rarely                | Sometimes             | Often                 |
|------------------------------------------------|-----------------------|-----------------------|-----------------------|-----------------------|
| Personal communication with friends and family | <input type="radio"/> | <input type="radio"/> | <input type="radio"/> | <input type="radio"/> |
| Sharing educational information or resources   | <input type="radio"/> | <input type="radio"/> | <input type="radio"/> | <input type="radio"/> |
| Planning or learning about upcoming events     | <input type="radio"/> | <input type="radio"/> | <input type="radio"/> | <input type="radio"/> |
| Surfing for entertainment                      | <input type="radio"/> | <input type="radio"/> | <input type="radio"/> | <input type="radio"/> |
| Playing online games                           | <input type="radio"/> | <input type="radio"/> | <input type="radio"/> | <input type="radio"/> |
| Raising awareness/ fundraising                 | <input type="radio"/> | <input type="radio"/> | <input type="radio"/> | <input type="radio"/> |

Any other main uses:

## 13. Consider any contact you have with peers or colleagues who are AT OTHER UNIVERSITIES through Facebook. Which of the following statements BEST describes the nature of that communication?

- It is entirely personal/social
- It is mostly personal/social. Sometimes we will compare parts of our programs, or discuss what we are currently learning, but it is rare.
- In addition to some personal/social communication, I frequently use it to do things such as: share links to good academic resources, discuss research findings, obtain input on my current academic assignments/endeavors, etc.

# Facebook in Healthcare Education

## Section III: Privacy Settings

### 14. Have you ever altered your personal privacy settings?

- Yes
- No

### 15. Which of the following played a role in your decision to change your personal privacy settings? (Choose all that apply):

- Protecting your personal information from strangers
- Risk of your account being viewed by an admissions committee or potential employers
- Served in a position where you were viewed as a role model (eg. Residence assistant, preceptor, volunteering with a youth mentorship program, etc.)
- Advice from peers
- Recommendation from an instructor, tutor, professor or mentor
- Not trusting Facebook's use of posted information

Other (please specify)

## Section IV: Facebook in Education and Health

### 16. Findings from research suggest that people have differing opinions on issues surrounding Facebook and its use within education, healthcare, and personal contexts. Given this finding, which of the following would you say plays the LARGEST role in creating these differing views?

- Profession (including being in training for a specific profession)
- Country of origin
- Age
- Personality type (introvert or extrovert)
- Sex

Other (please specify)

## Facebook in Healthcare Education

### 17. To what extent do you agree/disagree with the following statements about the use of Facebook in education?

|                                                                                                                                                                     | Strongly Disagree     | Disagree              | Agree                 | Strongly Agree        |
|---------------------------------------------------------------------------------------------------------------------------------------------------------------------|-----------------------|-----------------------|-----------------------|-----------------------|
| I think that Facebook is useful in education                                                                                                                        | <input type="radio"/> | <input type="radio"/> | <input type="radio"/> | <input type="radio"/> |
| Our university should try harder to incorporate Facebook into all its courses                                                                                       | <input type="radio"/> | <input type="radio"/> | <input type="radio"/> | <input type="radio"/> |
| Facebook has some features that could be useful in education, but I am unsure how well it would work                                                                | <input type="radio"/> | <input type="radio"/> | <input type="radio"/> | <input type="radio"/> |
| I enjoy using Facebook for its personal and social benefits, but I try to avoid dealing with school or work-related content while using it. They should be separate | <input type="radio"/> | <input type="radio"/> | <input type="radio"/> | <input type="radio"/> |
| There is no need to incorporate Facebook in education. I believe our current online systems are more than adequate                                                  | <input type="radio"/> | <input type="radio"/> | <input type="radio"/> | <input type="radio"/> |

### 18. To what extent do you agree/disagree with the following statements about the potential use of Facebook in healthcare?

|                                                                                                                                          | Strongly Disagree     | Disagree              | Agree                 | Strongly Agree        |
|------------------------------------------------------------------------------------------------------------------------------------------|-----------------------|-----------------------|-----------------------|-----------------------|
| Facebook would be useful for online consultations                                                                                        | <input type="radio"/> | <input type="radio"/> | <input type="radio"/> | <input type="radio"/> |
| Facebook would be useful for scheduling of appointments                                                                                  | <input type="radio"/> | <input type="radio"/> | <input type="radio"/> | <input type="radio"/> |
| Facebook would be useful for filling prescriptions                                                                                       | <input type="radio"/> | <input type="radio"/> | <input type="radio"/> | <input type="radio"/> |
| Facebook would be useful to provide forums being mediated by healthcare professionals to answer questions                                | <input type="radio"/> | <input type="radio"/> | <input type="radio"/> | <input type="radio"/> |
| Facebook would be useful to provide opportunities for patients/clients with similar illnesses or conditions to connect for support, etc. | <input type="radio"/> | <input type="radio"/> | <input type="radio"/> | <input type="radio"/> |

## Section V: Online Professionalism

### 19. To what extent do you agree/disagree with the following statements about professionalism in the healthcare field?

|                                                                                                                                    | Strongly Disagree     | Disagree              | Agree                 | Strongly Agree        |
|------------------------------------------------------------------------------------------------------------------------------------|-----------------------|-----------------------|-----------------------|-----------------------|
| I have a good understanding of what professionalism is, and what is expected of me as a current or future professional             | <input type="radio"/> | <input type="radio"/> | <input type="radio"/> | <input type="radio"/> |
| I fully agree with the expectations of professionalism, and consciously strive to abide by them in all areas of my life            | <input type="radio"/> | <input type="radio"/> | <input type="radio"/> | <input type="radio"/> |
| A high level of professionalism should be expected of healthcare students from the very beginning of their time as a student       | <input type="radio"/> | <input type="radio"/> | <input type="radio"/> | <input type="radio"/> |
| There should be some leniency in regards to small incidents of unprofessional conduct in the early years of a professional program | <input type="radio"/> | <input type="radio"/> | <input type="radio"/> | <input type="radio"/> |



## Facebook in Healthcare Education

**20. Current literature suggests that professionalism may be dependent on context or the environment. In which of the following environments do you believe it is reasonable to expect healthcare students to act professionally AT ALL TIMES?**

**(Check all that apply)**

- At the University (eg. In lecture halls, tutorial rooms)
- In the clinic/workplace/hospital
- During free time spent in view of the public

If you left any of the above choices unchecked, please explain why:

**21. To what extent do you agree/disagree with the following statements about standards of professionalism relating to online activity?**

|                                                                                                                               | Strongly Disagree     | Disagree              | Agree                 | Strongly Agree        |
|-------------------------------------------------------------------------------------------------------------------------------|-----------------------|-----------------------|-----------------------|-----------------------|
| Professionalism is as important in online activity as it is in traditional environments                                       | <input type="radio"/> | <input type="radio"/> | <input type="radio"/> | <input type="radio"/> |
| It is not always entirely possible to maintain professionalism in online activity                                             | <input type="radio"/> | <input type="radio"/> | <input type="radio"/> | <input type="radio"/> |
| People have the opportunity to post pictures and document aspects of professionals' lives that would otherwise remain private | <input type="radio"/> | <input type="radio"/> | <input type="radio"/> | <input type="radio"/> |
| Social media has removed protection for professionals from the public                                                         | <input type="radio"/> | <input type="radio"/> | <input type="radio"/> | <input type="radio"/> |
| Professionals are never free to let their guard down                                                                          | <input type="radio"/> | <input type="radio"/> | <input type="radio"/> | <input type="radio"/> |
| The risks of social networking software far outweigh the benefits and its use by health professionals should be DISCOURAGED   | <input type="radio"/> | <input type="radio"/> | <input type="radio"/> | <input type="radio"/> |
| The risks of social networking software far outweigh the benefits and its use by health professionals should be BANNED        | <input type="radio"/> | <input type="radio"/> | <input type="radio"/> | <input type="radio"/> |
| I don't think my online activity has a bearing on who I am as a professional                                                  | <input type="radio"/> | <input type="radio"/> | <input type="radio"/> | <input type="radio"/> |
| I should be able to do whatever I want online                                                                                 | <input type="radio"/> | <input type="radio"/> | <input type="radio"/> | <input type="radio"/> |
| The university has no business interfering in my online activity                                                              | <input type="radio"/> | <input type="radio"/> | <input type="radio"/> | <input type="radio"/> |

## Facebook in Healthcare Education

**22. Consider the following list of possible negative outcomes resulting from unprofessional behaviour online. Please rank the items in the list from those you would personally find most concerning (1), to least concerning (5).**

Rank (1-5) (Choose each number only once)

People having the opportunity to make inaccurate judgments about you solely based on posted content

The possibility that your behavior could affect the image of others in your profession

Not being hired by an employer or being accepted to a program because of information discovered about you online

The possibility of losing a position you already have (as an employee or student) because of information discovered about you online

Having privileged information about a patient/client distributed online without their consent

**23. Do you believe the debate about online professionalism is more important or less important to other professions than your own?**

- I believe this issue is more important for my faculty in particular, compared with some other health professions
- I believe this issue is equally important across all health professions faculties
- I believe this issue is more relevant in certain other health faculties than my own

(please explain, or name those faculties):

## Online Professionalism contd.

## Facebook in Healthcare Education

### 24. Which of the following types of material (if posted on Facebook) would you consider to be unprofessional? (Choose all that apply):

- A picture of an individual having one alcoholic beverage
- Pictures of an individual clearly acting drunk
- Status updates describing substantial alcohol consumption at a party
- Posts depicting illicit drug consumption
- Posts that disclose information about a patient/client
- Photos of a patient/client
- Posts describing an interaction with a patient/client, that do not reveal any identifying information
- Swearing or foul language
- Obscene gestures in photos (middle finger, etc)
- Petty criminal activity
- Endorsements of a pharmaceutical or health product without a conflict of interest disclosure
- Posts involving overt sexual content
- Posts containing partial nudity
- Displaying your current relationship status
- Displaying membership in online groups dealing with controversial issues
- Making opinionated comments about controversial issues
- Critical comments about a lecturer or preceptor
- Critical comments of course material, your program, faculty, or the university
- Attitudes of superiority or condescending behaviour (assumed because of professional status)

Other examples of unprofessionalism online (please specify)

### 25. Do you think that others would benefit from guidelines relating to using social networking software in a professional manner?

- Yes
- No

## Facebook in Healthcare Education

1  
2  
3  
4  
5  
6  
7  
8  
9  
10  
11  
12  
13  
14  
15  
16  
17  
18  
19  
20  
21  
22  
23  
24  
25  
26  
27  
28  
29  
30  
31  
32  
33  
34  
35  
36  
37  
38  
39  
40  
41  
42  
43  
44  
45  
46  
47  
48  
49  
50  
51  
52  
53  
54  
55  
56  
57  
58  
59  
60

**26. Are you aware of another a colleague posting material on Facebook, which you considered unprofessional?**

Yes

No

If yes, please describe:

**27. Have you yourself ever made any posts or comments on social media websites that, in hindsight, you probably shouldn't have?**

Yes

No

If yes, please describe:

**28. Has anyone else ever posted material about you online which you found embarrassing or which made you look unprofessional?**

Yes

No

If yes, please describe:

**29. How would you describe your typical actions or behavior in an online social media environment, given the following definitions?**

**-Active behavior: making comments, posting links or photos, sending invites**

**-Passive behavior: reading, observing, having pictures of you or other content relating to you posted by others**

More active than passive

More passive than active

About half active, and half passive

I do not have an account on a social media website

## Facebook in Healthcare Education

**30. In light of your response to the previous question, which do you think is a better strategy for protecting your online image?**

- Abstaining from Facebook completely and not having an account at all
- Maintaining an account, so you can monitor posts that might involve you (pictures, etc.)

**31. Do you think that you could benefit from guidelines relating to using social networking software in a professional manner?**

- Yes
- No

**32. Do you think that current guidelines at the University adequately address and define issues relating to Facebook and online professionalism for those that might be unsure?**

- Yes, they are fine
- No, they should be amended to specifically address issues of online activity
- I am unfamiliar with current guidelines for professionalism and conduct
- There is no need for the University to issue guidelines on my online activity

**33. Please take a moment and include any comments you might have about Facebook use by current and future healthcare professionals, your feelings about online professionalism (ways to improve it, or if it should be considered an issue at all), or any other thoughts that this survey might have provoked:**

1  
2  
3  
4 28 April 2013  
5  
6

7 Dear Richard  
8

9 RE: Manuscript ID [bmjopen-2013-003013](#) entitled ""Have you seen what's on  
10 Facebook?" The use of social networking software by healthcare professions students."  
11

12 Many thanks for reviewing our manuscript. We enjoyed reading the comments, and  
13 have responded to each in detail below. We have also uploaded a revised version of the  
14 text (a 'Track Changes' version and 'Final'), along with a couple of Appendices. We  
15 hope that this meets with your approval and we look forward to hearing from you again.  
16  
17

18 Best wishes  
19

20 Dr Jonathan White  
21  
22  
23  
24  
25  
26  
27  
28  
29  
30  
31  
32  
33  
34  
35  
36  
37  
38  
39  
40  
41  
42  
43  
44  
45  
46  
47  
48  
49  
50  
51  
52  
53  
54  
55  
56  
57  
58  
59  
60

1  
2  
3 Responses to Reviewers  
4

5 From the managing editor:  
6  
7

8  
9 ABSTRACT  
10

11 Please report at least the headline response rate in the Results of the abstract (17%).  
12

13 **Response:** so amended.  
14

15 In the results, are you able to report response rate by course (medicine, nursing, etc)?  
16  
17

18 **Response:** so amended  
19

20 Results: 'beneficial' - beneficial to whom?  
21

22 **Response:** this point is addressed in the second clause of the sentence:  
23

24 *A majority agreed that guidelines would be beneficial: 79% agreed that others would*  
25 *benefit, and 62% stated they would benefit personally.*  
26  
27

28  
29  
30 Strengths and limitations section & conclusion: 'we believe we have shown...' I think you  
31 need to be more tentative here, I'm afraid. We often don't consider survey work with  
32 such a low response rate, for reasons of response bias and non-representativeness, but  
33 the reviewers are quite positive. However, unless you can provide a stronger argument  
34 you need to temper this assertion.  
35  
36

37 **Response:** We are in agreement, and have amended the section on Strengths and  
38 Limitations accordingly:  
39

40 *Strengths and limitations of this study*  
41

42 *Although the survey element of this study had a relatively low response rate, it did*  
43 *gather data from a large number of students training in several different health*  
44 *professions, and we believe it provides an interesting snapshot of attitudes to social*  
45 *networking software at our school. The low response rate to the survey means that we*  
46 *cannot exclude the possibility of response bias and that we cannot easily generalize our*  
47 *findings to the whole population. Given these limitations, we believe that we have*  
48 *shown that use of Facebook is widespread among the healthcare students we studied,*  
49 *and that we have identified areas for education policymakers to focus on.*  
50  
51  
52

53  
54 INTRODUCTION

55 First line: 'our society'; this is pretty vague. Can you tighten this up a little with regard to  
56 who you're referring to here?  
57  
58  
59  
60

1  
2  
3  
4  
5  
6  
7  
8  
9  
10  
11  
12  
13  
14  
15  
16  
17  
18  
19  
20  
21  
22  
23  
24  
25  
26  
27  
28  
29  
30  
31  
32  
33  
34  
35  
36  
37  
38  
39  
40  
41  
42  
43  
44  
45  
46  
47  
48  
49  
50  
51  
52  
53  
54  
55  
56  
57  
58  
59  
60

**Response:** So amended:

*In recent years, the use of social networking websites such as Facebook, MySpace and Twitter has become ubiquitous in many western countries.*

## METHODS

How were the 14 interviewed students selected? Were they the only 14 who replied? How many did you invite? How were they selected? What techniques for the qualitative analysis were used? The reporting section here is a bit weak; I suggest looking at these paper for advice on what to include:

<http://intqhc.oxfordjournals.org/content/15/3/261.full>

<http://intqhc.oxfordjournals.org/content/19/6/349.abstract>

**Response:** Thanks for these suggestions. The relevant section is in the second paragraph of of Methods.

*Convenience sampling was used for recruitment of interview subjects: participants were contacted through email, inviting voluntary participation in an interview. Students in nursing, medicine, dentistry, pharmacy, dental hygiene, speech and language pathology, occupational therapy and physical therapy were included in the invitation email distribution list and a single reminder email was sent. There were no specific exclusion criteria. Consent was obtained in person by the interviewer*

How were the 14 interviewed students selected?

- An email was sent to all of the students as listed above, plus one reminder.

Were they the only 14 who replied?

- Yes

How many did you invite?

-All of them (approximately 3,900 students)

How were they selected?

- the first 14 to reply were interviewed.

That said, it's good the survey was piloted.

Para 3: sentence 4; not immediately clear if the convenience sample refers to the testing or the actual survey



1  
2  
3 **Response:** This reference has been removed for clarity.  
4  
5

6  
7 As per my query above, what analytical framework was used to analyse the free-text  
8 responses?  
9

10  
11 **Response:** It was not the purpose of the interviews to generate a conceptual framework  
12 to describe an underlying phenomenon. Therefore, we chose not to employ an  
13 approach using a particular analytical framework – for instance, a grounded theory  
14 approach was not appropriate in this case. Instead, the purpose of the interview phase  
15 was to gain a broad understanding of a number of themes or areas of interest that could  
16 be further explored in a larger population using an online survey. Therefore, we adopted  
17 a simple thematic analysis to define themes of interest. We have amended Methods  
18 accordingly.  
19

20  
21  
22 *Interviews were audio-recorded and transcribed by a research assistant; transcripts*  
23 *were then analyzed to identify common themes using a simple thematic analysis*  
24 *approach.*  
25  
26

## 27 28 RESULTS

29 second sentence: '...behaviour on Facebook'? or "behaviour posted on Facebook' -  
30 because drug use, etc., can't be done 'on' Facebook while breaches of privacy or  
31 insulting comments can. Reword slightly?  
32  
33

34 **Response:** Agreed, amended to:  
35 *breaches of professional behaviour posted on Facebook*  
36  
37

38  
39  
40 '44% of respondents described seeing unprofessional material' - or material they  
41 considered unprofessional? (The wording of the survey would help here.)  
42

43 **Response:** Agreed, amended to:  
44 *44% of respondents described seeing material they considered unprofessional which*  
45 *had been posted to Facebook by a colleague*  
46  
47  
48  
49  
50  
51  
52  
53  
54  
55  
56  
57  
58  
59  
60

1  
2  
3 Reviewer: Joanna MacDonald,  
4 Associate Dean and Senior Lecturer,  
5 University of Otago Wellington,  
6 New Zealand.  
7  
8

9 I have no competing interests  
10

11 Participants: It would be useful to know what proportion of the class of each discipline  
12 was represented eg what proportion of the total number of medical students is  
13 represented by 232?  
14  
15

16  
17 **Response:** Agreed, this information has been added in Table 1.  
18  
19

20  
21 Similarly, how representative is the gender balance of the total population?  
22  
23

24 **Response:** We consider the gender balance to be as expected given the faculties  
25 studied, and have added the following in support of Table 1:  
26

27 *As expected, females outnumbered males in all the faculties sampled; the proportion of*  
28 *female respondents ranged from 95% in Nursing to 58% in Medicine.*  
29  
30

31 Method: I would like to see a copy of the interview schedule and the questionnaire  
32 appended. I would also like more detail of how the qualitative analysis was carried out.  
33  
34

35  
36 **Response:** Re: Interview schedule and questions – these have been added as  
37 supplemental files as Appendices.  
38  
39

40 Re: analysis. It was not the purpose of the interviews to generate a conceptual  
41 framework to describe an underlying phenomenon. Therefore, we chose not to employ  
42 an approach using a particular analytical framework – for instance, a grounded theory  
43 approach was not appropriate in this case. Instead, the purpose of the interview phase  
44 was to gain a broad understanding of a number of themes or areas of interest that could  
45 be further explored in a larger population using an online survey. Therefore, we adopted  
46 a simple thematic analysis to define themes of interest. We have amended Methods  
47 accordingly.  
48  
49

50 *Interviews were audio-recorded and transcribed by a research assistant; transcripts*  
51 *were then analyzed to identify common themes using a simple thematic analysis*  
52 *approach.*  
53  
54  
55  
56  
57  
58  
59  
60

1  
2  
3 It would be useful to see some comparison between the different disciplines, and by  
4 gender.  
5  
6  
7

8 **Response:** While we agree that this would be an interesting comparison, such an  
9 analysis is beyond the scope of this particular study. The purpose of this study was to  
10 look at students in the health professions as a whole, not to draw comparisons between  
11 individual groups. The relatively low response rate and the low number of responses in  
12 some faculties makes proper comparison problematic. Comparison by gender is  
13 problematic for the same reasons: it was not the intent of the study, and the number of  
14 male respondents was limited.  
15  
16

17 The results could be summarised and tables used to present some of the data that is  
18 presented as text, eg para 2 of p10 could be tabulated.  
19  
20

21  
22 **Response:** We agree, added Table 1.  
23  
24  
25

26 Many of the quotes do not actually illustrate the accompanying text and better examples  
27 are evident in the Table in the appendix, eg the quote on p10 could more usefully  
28 illustrate disrespect for patients; the 1st quote on p11 does not indicate that the student  
29 does not object to the practice.  
30  
31  
32

33 **Response:** We have tried to honour our participants as much as possible by using their  
34 original words in this paper. We agree that in some cases, one quotation may shed light  
35 a number of points. Our selection of some quotations for the main text and others for  
36 the Table is based purely on considerations of manuscript length, and we have provided  
37 both to allow readers to see the diversity of opinions among our participants.  
38  
39  
40

41 The discussion is interesting, but the paper risks repeating previous work-analysing the  
42 different health professions separately and comparing would add to the significance of  
43 the study.  
44  
45

46 **Response:** While we agree that this would be an interesting comparison, such an  
47 analysis is beyond the scope of this particular study. We think the strength of this study  
48 is in looking across a large number of students in the healthcare professions at a single  
49 school (232 trainee doctors, 200 trainee nurses, 82 trainee pharmacists, etc) to see  
50 what issues relating to social networking software might affect them all.  
51  
52

53 I am uncertain how the study helps understanding the "pedagogy" of Facebook use.  
54

55 **Response:** We think that it is appropriate to use the term "pedagogy" here as we are  
56 considering the use of Facebook by students in the healthcare professions who are  
57  
58  
59  
60

1  
2  
3 engaged in a program of learning. It is also appropriate to consider pedagogical  
4 implications, as we are taking the perspective of healthcare educators trying to  
5 understand how our learners are engaging with a new technology as their roles as  
6 developing healthcare professionals.  
7  
8  
9

10 There are 2 mistakes in the reference list-#31 should read "Australian" medical  
11 association (not American); and #37 has the title of the article missing.  
12  
13

14  
15 **Response:** Thanks for this. References #31 and #36 have been amended accordingly.  
16 The title of reference #37 is "Podcasting: a technology, not a toy."  
17  
18

19 *White J, Sharma N. Podcasting: a technology, not a toy. Adv in Health Sci Educ.*  
20 *2012;17:601-603*  
21

22 I think this is interesting and important work and I have suggested major revision  
23 only because it could be enhanced by more statistical analysis to maximise the  
24 information available from this data. The word count could be significantly reduced.  
25  
26  
27  
28  
29  
30  
31  
32  
33  
34  
35  
36  
37  
38  
39  
40  
41  
42  
43  
44  
45  
46  
47  
48  
49  
50  
51  
52  
53  
54  
55  
56  
57  
58  
59  
60

1  
2  
3 Reviewer: Kathleen Gray  
4 Senior Research Fellow, Health Informatics  
5 University of Melbourne, Australia  
6  
7

8 I have no competing interests.  
9

10 Overall an interesting, topical and well-written paper. A few suggestions...  
11

12 Intro:  
13

14  
15 You've used your 2nd ref to substantiate statistics which that study didn't generate but  
16 rather referenced, so it would be more accurate if you cited the original sources. These  
17 are:  
18

19  
20 70.8% of UK medical students used social networking sites (n = 212; Sandars, Homer,  
21 Pell & Croker, 2008)  
22

23 **Sandars, J., Homer M., Pell, G., & Croker, T. (2008). Web 2.0 and social software: The**  
24 **medical student way of e-learning. Medical Teacher. DOI:**  
25 **10.1080/01421590701798729**  
26

27  
28 64.3% of medical students at one US university had Facebook accounts (n = 501;  
29 Thompson, Dawson, Ferdig, Black, Boyer, Coutts et al., 2008).  
30

31 **Thompson, L. A., Dawson, K., Ferdig, R., Black, E. W., Boyer, J., Coutts, J., & Black,**  
32 **N. P. (2008). The intersection of online social networking with medical professionalism.**  
33 **Journal of General Internal Medicine, 23(7), 954-957.**  
34  
35

36  
37 **Response: Thanks for this, we have amended our references accordingly.**  
38

39  
40  
41 NB your 36th reference, to Thompson et al., is missing the title of the paper (see  
42 above).  
43

44  
45 If you still want to refer to Gray et al., of course we'd like that. Our study provides  
46 evidence that medical students aren't inherently educationally effective users of  
47 Facebook, so you could use it to underscore your arguments for student guidelines.  
48

49  
50 **Response: Thanks for this too, we have amended the reference accordingly and cited**  
51 **Gray et al in mention of the challenges associated with facebook use (the new #36) ☺**  
52  
53

54  
55 Methods:

56 I would like to have seen the survey instrument, or at least an outline of the questions,  
57  
58  
59  
60

1  
2  
3 to determine how they were phrased to avoid biasing the responses in favour of  
4 guidelines being a good thing.  
5  
6  
7

8 **Response:** Agree, these have been added as supplemental files, Appendices 1 and 2.  
9  
10

11 Results:

12 In the age range 18-25 it is possible that Facebook use can change as students  
13 become more mature; some of the quotes you use suggest that students have  
14 tempered their Facebook activity with the benefit of hindsight. Also, professionalism  
15 may be taught and learned differently in each health discipline (unless professional  
16 ethics and practice subjects are taught as interdisciplinary subjects at your university?).  
17  
18

19 **Response:** These are interesting points, although beyond the scope of this study.  
20  
21  
22

23 It would be good to know if you looked at whether the survey results you report can be  
24 differentiated by age or by health discipline (or by gender, since you mention this factor  
25 too).  
26  
27

28 **Response:** While we agree that these would be interesting comparisons, such analyses  
29 are beyond the scope of this particular study. The purpose of this study was to look at  
30 students in the health professions as a whole, not to draw comparisons between  
31 individual groups. The relatively low response rate and the low number of responses in  
32 some faculties makes proper comparison problematic. Comparison by age and gender  
33 is problematic for the same reasons: it was not the intent of the study, and the number  
34 of male respondents was limited.  
35  
36  
37  
38

39 Discussion and conclusion:

40 93% of 692 students with a Facebook account, out of a possible 3984 students, is  
41 simply not evidence of “widespread” use; I would suggest tempering this adjective.  
42  
43  
44

45 **Response:** Agree, we have amended this to:  
46  
47

48 *Given these limitations, we believe that we have shown that use of Facebook is*  
49 *widespread among the healthcare students we studied, and that we have identified*  
50 *areas for education policymakers to focus on.*  
51  
52  
53  
54  
55  
56  
57  
58  
59  
60



**"Have you seen what's on Facebook?" The use of social networking software by healthcare professions students.**

|                                 |                                                                                                                                                                                                                                                                        |
|---------------------------------|------------------------------------------------------------------------------------------------------------------------------------------------------------------------------------------------------------------------------------------------------------------------|
| Journal:                        | <i>BMJ Open</i>                                                                                                                                                                                                                                                        |
| Manuscript ID:                  | bmjopen-2013-003013.R2                                                                                                                                                                                                                                                 |
| Article Type:                   | Research                                                                                                                                                                                                                                                               |
| Date Submitted by the Author:   | 19-May-2013                                                                                                                                                                                                                                                            |
| Complete List of Authors:       | White, Jonathan; University of Alberta, Surgery<br>Kirwan, Paul; University of Alberta, Surgery<br>Lai, Krista; University of Alberta, Family Medicine<br>Walton, Jennifer; University of Alberta, Pediatrics<br>Ross, Shelley; University of Alberta, Family Medicine |
| <b>Primary Subject Heading</b>: | Medical education and training                                                                                                                                                                                                                                         |
| Secondary Subject Heading:      | Medical education and training                                                                                                                                                                                                                                         |
| Keywords:                       | Information technology < BIOTECHNOLOGY & BIOINFORMATICS, World Wide Web technology < BIOTECHNOLOGY & BIOINFORMATICS, Information management < BIOTECHNOLOGY & BIOINFORMATICS                                                                                           |
|                                 |                                                                                                                                                                                                                                                                        |

SCHOLARONE™  
Manuscripts

**Title**

“Have you seen what’s on Facebook?” The use of social networking software by healthcare professions students

---

**Authors**

J White, P Kirwan, K Lai, J Walton, S Ross.

**Affiliations**

J White, Associate Professor, Department of Surgery, University of Alberta.

P Kirwan, Research Assistant, Department of Surgery, University of Alberta.

K Lai, Medical Student, Department of Family Medicine, University of Alberta.

J Walton, Assistant Professor, Department of Pediatrics, University of Alberta.

S Ross, Assistant Professor, Department of Family Medicine, University of Alberta.

**Corresponding Author****Dr Jonathan White**

Address: Room 202 Community Services Centre, Royal Alexandra Hospital,  
10240 Kingsway Avenue, Edmonton AB T5H 3V9, Canada

Email: [jswhite1@ualberta.ca](mailto:jswhite1@ualberta.ca)

Phone: (780) 735-5147

Fax: (780) 735-5459



## ABSTRACT

**Objective.** The use of social networking software has become ubiquitous in our society. The aim of this study was to explore the attitudes and experiences of healthcare professional students using Facebook at our school, and to determine if there is a need for development of policy to assist students with utilizing this technology during their professional education.

**Design.** A mixed-methods approach was employed, using semi-structured interviews to identify important themes which were further explored using an online survey. A combination of descriptive statistics and thematic analysis was used to analyse the data obtained.

**Setting & Participants:** Students of Medicine, Nursing, Pharmacy, Speech & Language Pathology, Occupational Therapy, Physical Therapy, Dentistry, Dental Hygiene and Medical Laboratory Science at a large North American university.

**Results.** 14 interviews were analysed in-depth, and 682 healthcare professions students responded to the survey, an approximate 17% response rate. 93% reported current Facebook use. Themes identified included: patterns of use and attitudes to friendship, attitudes to online privacy, breaches of professional behaviour on Facebook, and attitudes to guidelines relating to Facebook use. A majority considered posting of the following material unprofessional: use of alcohol and drugs, crime, obscenity, patient/client information, sexual content and nudity and criticism of others. 44% reported seeing such material posted by a colleague, and 27% reported posting such

1  
2  
3 material themselves. A majority of participants agreed that guidelines for Facebook use  
4  
5 would be beneficial.  
6  
7

8  
9 **Conclusions.** Social networking software use, specifically Facebook use, was  
10  
11 widespread among healthcare students at our school who responded to our survey. Our  
12  
13 results highlight some of the challenges which can accompany the use of this new  
14  
15 technology and offer potential insights to help understand the pedagogy and practices  
16  
17 of Facebook use in this population, and to help students navigate the dilemmas  
18  
19 associated with becoming 21st century healthcare professionals.  
20  
21  
22  
23  
24  
25  
26  
27  
28  
29  
30  
31  
32  
33  
34  
35  
36  
37  
38  
39  
40  
41  
42  
43  
44  
45  
46  
47  
48  
49  
50  
51  
52  
53  
54  
55  
56  
57  
58  
59  
60

### *Article focus*

The use of social networking software has become ubiquitous in our society. Healthcare practitioners and their students have struggled to integrate this new technology with the expectations of professional behaviour.

### *Key messages*

- Social networking software is widespread amongst healthcare students at our school. This paper highlights the challenges which accompany the use of this new technology, including the posting of unprofessional and inappropriate material online.
- We discuss the dilemma of students wanting to share information in a mixed social network in order to remain popular, while also being wary about how material shared will make them appear.
- We suggest that guidelines for the use of social networking software may help our students deal with this dilemma more effectively.

### *Strengths and limitations of this study*

Although the survey element of this study had a relatively low response rate, it did gather data from a large number of students training in several different health professions, and we believe it provides an interesting snapshot of attitudes to social networking software at our school. The low response rate to the survey means that we cannot exclude the possibility of response bias and that we cannot easily generalize our findings to the whole population. Given these limitations, we believe that we have

1  
2  
3  
4  
5  
6  
7  
8  
9  
10  
11  
12  
13  
14  
15  
16  
17  
18  
19  
20  
21  
22  
23  
24  
25  
26  
27  
28  
29  
30  
31  
32  
33  
34  
35  
36  
37  
38  
39  
40  
41  
42  
43  
44  
45  
46  
47  
48  
49  
50  
51  
52  
53  
54  
55  
56  
57  
58  
59  
60

shown that use of Facebook is widespread among the healthcare students we studied,  
and that we have identified areas for education policymakers to focus on.

For peer review only

## INTRODUCTION

In recent years, the use of social networking websites such as Facebook, MySpace and Twitter has become ubiquitous in many western countries. At the time of writing, there are over 18.5 million Facebook users in Canada alone, and over 70% of the Canadian population possesses a Facebook account [1]. Facebook use is highly prevalent among medical students: at least 60% of medical students in the US, and over 70% of medical students in the UK are active users [2,3].

A number of authors have written that social networking software has the potential to revolutionize healthcare by increasing interaction between providers and clients and facilitating the free flow of information relating to healthcare [4]. A recent study among primary care physicians and oncologists demonstrated that a majority of those studied used social networking software to keep abreast of new developments in their field and to share knowledge [5]. A recent series of articles has called for surgeons to embrace social media as well [6].

Other authors have called for caution in healthcare providers engaging with social networking software. The software encourages users to share the events of their lives; for individuals training to enter the health professions, such sharing may be in conflict with requirements for confidentiality and professionalism of the profession for which they are training [7]. Some have suggested that Facebook will lead to an unacceptable blurring of the professional and the personal, and make it difficult to maintain proper

1  
2  
3 boundaries and professional principles [8,9]. Other authors have gone further and  
4 suggested that it may be best for healthcare providers not to engage in social  
5 networking online [10], or that Facebook use should be monitored or policed in some  
6 way [11,12].  
7  
8  
9  
10  
11

12  
13  
14  
15 This study grew out of a discussion within our medical school about our own students'  
16 use of Facebook, based on a number of incidents in which we thought our students  
17 could have used Facebook more appropriately. This led to a debate about how (or  
18 indeed if) we should advise our students about using such social networking software.  
19 We decided to focus on Facebook use instead of Twitter or MySpace, as this has been  
20 shown to be the most widely-adopted form of social networking software at the moment  
21 [6,13,14]. Most other studies on online social networking in healthcare education have  
22 focused on medical students, but we decided to sample a larger population to obtain a  
23 broad snapshot of the use of Facebook in all of our healthcare faculties at our school.  
24  
25  
26  
27  
28  
29  
30  
31  
32  
33  
34  
35  
36  
37  
38

39 The aim of this study was to explore the attitudes and experiences of healthcare  
40 professional students using Facebook at our university, with the aim of determining if  
41 there is a need for development of policy or guidelines to assist students with integrating  
42 this new technology as they progress in their education.  
43  
44  
45  
46  
47  
48  
49  
50  
51  
52  
53  
54  
55  
56  
57  
58  
59  
60

## METHODS

We employed a mixed-methods approach, conducting interviews with a small number of healthcare professions students first to identify important themes related to the use of social networking software, and then developing an online survey which was administered to a larger group.

Semi-structured interviews were conducted with healthcare professions students at our university about participants' current use of social networking services. Interview questions were developed by the authors after a review of the literature (Appendix 1).

Convenience sampling was used for recruitment of interview subjects: participants were contacted through email, inviting voluntary participation in an interview. Students in nursing, medicine, dentistry, pharmacy, dental hygiene, speech and language pathology, occupational therapy and physical therapy were included in the invitation email distribution list and a single reminder email was sent. There were no specific exclusion criteria. Consent was obtained in person by the interviewer. Interviews lasted 30-45 minutes, and were designed to elicit information about participants' current use of social networking software. Interviews were audio-recorded and transcribed by a research assistant (PK) who then analysed the transcripts to identify common themes using a simple thematic analysis approach. Two other readers (JW and SR) reviewed the transcripts to cross-check the analysis and to refine the themes identified.

Consensus was reached by discussion between the three readers. Recruitment of new

1  
2  
3 interview subjects was halted when data saturation was reached and no new themes  
4  
5 emerged from new interviews. This was achieved at 14 interviews.  
6  
7  
8  
9

10 Themes identified from interview data were used to construct an anonymous online  
11 survey (Appendix 2). Items included a range of single-best-choice, Likert-scale, ranking  
12 and free response items. All items were revised by testing with health professions  
13 students before the survey was distributed. The survey was distributed by email to  
14 students in all of the healthcare professions listed above. Participants were contacted  
15 through email, inviting voluntary participation in the survey; participants who had been  
16 interviewed were free to respond to the survey too.  
17  
18  
19  
20  
21  
22  
23  
24  
25  
26  
27  
28

29 Descriptive statistics were used to describe responses to each question. Free-text  
30 responses were analyzed to identify common themes and representative quotations  
31 using the same readers and techniques described above for analysis of interview  
32 transcripts. This study reports our findings relating to students' use of Facebook,  
33 unprofessional behaviours observed online, and about the need for guidelines relating  
34 to social networking software for healthcare professionals. Ethics approval was obtained  
35 from the local Health Research Ethics Board.  
36  
37  
38  
39  
40  
41  
42  
43  
44  
45  
46  
47

## 48 **RESULTS**

49 The study took place in fall 2011. The 14 participants who attended for interview were  
50 from the following faculties: medicine: 6, nursing: 5, pharmacy: 1, physical therapy: 1,  
51 dentistry: 1. We identified the following themes at interview: patterns of Facebook use,  
52  
53  
54  
55  
56  
57  
58  
59  
60



1  
2  
3 attitudes to friendship on Facebook, attitudes to online privacy, breaches of professional  
4 behaviour posted on Facebook (including use of alcohol and drugs, crime, obscenity,  
5 patient/client information, sexual content and nudity, criticism of others) and attitudes to  
6 guidelines relating to Facebook use.  
7  
8  
9  
10  
11

12  
13  
14  
15 A total of 682 students responded to the survey, a response rate of approximately 17%  
16 (estimated total number of students: 3984). The number of respondents, response rate  
17 and gender balance from each faculty are shown in Table 1. As expected, females  
18 outnumbered males in all the faculties sampled. In the following section, quotations from  
19 free-response items are presented to highlight particular themes identified, while  
20 percentages in brackets are used to indicate the proportion of respondents to the online  
21 survey who expressed agreement with a particular theme or statement observed.  
22  
23  
24  
25  
26  
27  
28  
29  
30  
31  
32 Additional representative quotations are presented in Table 2.  
33  
34  
35

36  
37 93% of respondents reported having a Facebook account; 76% described checking  
38 their account at least 2 times per day, with 39% checking at least 5 times a day. When  
39 asked "who is on your friend list?", respondents indicated the following categories: other  
40 students 96%, previous work colleagues 73%, current work colleagues 44%, previous  
41 instructors 21%, current instructors 5%, previous patients/clients 2%, current  
42 patients/clients 0.3% .  
43  
44  
45  
46  
47  
48  
49  
50

51  
52  
53 Respondents were asked to consider the types of material that they would consider  
54 unprofessional in principle if posted to Facebook (Table 3). 99% of respondents agreed  
55  
56  
57  
58  
59  
60

1  
2  
3 that it would be unprofessional to post images or text which could be used to identify a  
4 patient. 40% of respondents said it was unprofessional to post anything at all relating to  
5 a patient/client, even without identifying information.  
6  
7  
8  
9

- 10  
11  
12  
13 • *A girl I know openly posts "quotes of the day" from patients she works with in mental*  
14 *health. She does not say who said them, and they are funny, but since I work there*  
15 *too, the info is identifying. I think it crosses a line.*  
16  
17  
18  
19

20  
21  
22 Over 80% considered posts or images relating to the following activities unprofessional:  
23 illicit drug consumption, criminal activity, overt sexual content, partial nudity and  
24 condescending or superior behaviour. At least 50% considered the following  
25 unprofessional: critical comments about a teacher, drunkenness/excessive drinking,  
26 swearing, and obscene gestures. Less than 10% objected to posts or photos depicting  
27 drinking in moderation, and to posting current relationship status.  
28  
29  
30  
31  
32  
33  
34  
35  
36  
37  
38

- 39 • *Plenty of students in my class post pictures of heavy drinking, many swear or have*  
40 *inappropriate sexual innuendo in their status updates.*  
41  
42  
43  
44  
45

46 44% of respondents described seeing material they considered unprofessional which  
47 had been posted to Facebook by a colleague (153 responses). The most common  
48 specific examples given included criticism of teachers and programs (56 instances),  
49 inappropriate photographs (47 instances), depictions of drunkenness (27), posts about  
50 patients (21) and negative comments about patients (13). Other examples included  
51  
52  
53  
54  
55  
56  
57  
58  
59  
60

1  
2  
3 parties attended (9), swearing (8), references to sex (7), inappropriate posts about work  
4  
5 (5), negative comments about other professions (5) and consumption of illegal drugs  
6  
7 (3). There were also descriptions of errors, negative comments about co-workers,  
8  
9 inappropriate behaviour in uniform, nudity, criminal activity, obscene gestures, racist  
10  
11 and sexist comments and pictures of a cadaver (1-2 of each).  
12  
13

- 14  
15  
16  
17  
18 • *I know a medical student who often posts complaints about her faculty and also*  
19  
20 *personal patient information*  
21

22  
23  
24 27% of respondents admitted to posting material which, with hindsight, they now  
25  
26 considered unprofessional (81 responses). The most common transgressions described  
27  
28 were posting inappropriate pictures (15 instances), swearing (13), criticizing teachers  
29  
30 and programs (9), drinking (9), posting comments open to misinterpretation (8) and  
31  
32 parties (5). There were 3 instances of posting sexual content, 2 posts about patients  
33  
34 and 1 example of expressing negative views about a patient.  
35  
36  
37

- 38  
39  
40  
41 • *I've wrote personal posts before that probably shouldn't have been posted.*  
42

43  
44  
45 44% described having material posted about them which they felt made them look  
46  
47 unprofessional (137 examples). The vast majority of these instances related to the  
48  
49 posting of photographs online (106); the most common areas of concern related to  
50  
51 alcohol consumption (39) and attending parties (15); there were also examples of nudity  
52  
53 (4), sexual material (3) and information pertaining to a relationship (1). 18% of  
54  
55  
56  
57  
58  
59  
60

1  
2  
3 respondents reported that the posting of such material had made them consider  
4  
5 withdrawing from the use of social networking software.  
6  
7  
8  
9

- 10 • *People have posted hilarious photos from parties and other events some of which*  
11 *depict me as being intoxicated but once again I'm hoping that due to privacy settings*  
12 *the general public cannot see these.*  
13  
14  
15  
16

17  
18  
19  
20 As a group, respondents were ambiguous about posting material on Facebook. Some  
21  
22 students considered it intrusive that faculty should even be enquiring about their  
23  
24 Facebook use, as they considered this too personal a topic for discussion. Others  
25  
26 expressed concern that faculty's expectations around their online activities were  
27  
28 unreasonable. Others took the view that they should be able to post what they like as  
29  
30 long as they could control who has access.  
31  
32  
33  
34  
35

- 36 • *Just because we are in a health care profession does not mean that we do not have*  
37 *freedom of speech.*  
38  
39  
40  
41  
42

43  
44 Students expressed the view that posting material to Facebook was associated with  
45  
46 some risk to their current position and future prospects.  
47  
48  
49

- 50 • *I am aware that my behaviour in all domains affects my reputation, so I am*  
51 *careful about who I am seen with and what I do.*  
52  
53  
54  
55  
56  
57  
58  
59  
60

1  
2  
3 Many students described censoring themselves and removing material they had posted  
4  
5 or been tagged in previously, or requesting to have their name removed from photos  
6  
7 posted by other users.  
8  
9

- 10 • *I went through my Facebook photos and took down the photos I had posted with*  
11 *me in party pictures from my first undergrad degree. If I even looked drunk or*  
12 *questionable, or if the party had a funny, (but inappropriate theme) then I took*  
13 *those pictures down as well. I don't generally post a lot of comments, and none*  
14 *that I regret, but a picture is still worth a thousand words.*  
15  
16  
17  
18  
19  
20  
21  
22  
23

24 98% of respondents described having altered the privacy settings of their Facebook  
25 account on at least one occasion; the reasons given for this included protection from  
26 strangers 99%, not trusting Facebook 62%, risk of viewing by potential employers 52%,  
27 advice from peers 30%, and advice from instructors 17%.  
28  
29  
30  
31  
32  
33  
34  
35

- 36 • *I don't really understand the privacy settings, so I just made them strict, just in case.*  
37  
38
- 39 • *I don't post anything on Facebook that could compromise me for work in any way.*  
40  
41  
42

43 Lastly, respondents were asked about the use of guidelines relating to the use of social  
44 networking software in health professions education. Many were unfamiliar with existing  
45 guidelines (43%); only 15% agreed that existing guidelines were adequate. A majority  
46 agreed that guidelines would be beneficial: 79% agreed that others would benefit, and  
47  
48  
49  
50  
51  
52  
53  
54  
55  
56  
57  
58  
59  
60

- 1  
2  
3  
4  
5  
6  
7  
8  
9  
10  
11  
12  
13  
14  
15  
16  
17  
18  
19  
20  
21
- *There are certain guidelines that I think any professional or role model should follow: no photos of inappropriate conduct (nudity, heavy drinking, sexual content, etc), patients/clients should not be added as friends or be able to view photos, confidential information remains confidential.. otherwise, if people are stupid enough to jeopardize their profession by posting something on facebook, they should deal with the consequences (losing a current or potential job, etc)*

## DISCUSSION

22  
23  
24  
25  
26

27 This study showed that social networking software use, specifically Facebook use, was  
28 widespread among the healthcare students at our school who responded to our survey.  
29 Our results highlight some of the challenges which can accompany the use of this new  
30 technology and offer potential insights to help understand the pedagogy and practices  
31 of Facebook use in this population, and to help students navigate the dilemmas  
32 associated with becoming 21st century healthcare professionals.  
33  
34  
35  
36  
37  
38  
39  
40  
41  
42

43 There was widespread agreement that posting material that can identify a patient/client  
44 should be considered unprofessional, as should material relating to drugs, sex, nudity,  
45 drunkenness, crime and obscenity. A majority also considered it unprofessional to post  
46 critical comments about teachers/programs and posts which could be considered  
47 condescending. Despite these stated understandings, nearly half of the students we  
48 studied reporting seeing their colleagues posting unprofessional material on Facebook,  
49  
50  
51  
52  
53  
54  
55  
56  
57  
58  
59  
60

1  
2  
3 and over a quarter reported posting such material themselves. There was a wide range  
4  
5 of transgressions reported, including criticism of teachers/programs, posting of  
6  
7 inappropriate photographs, drunkenness, parties and swearing.  
8  
9

10  
11  
12 Our findings agree with other recent papers in the field. A study by Giordano &  
13  
14 Giordano on healthcare students found that 77% of students used Facebook, and that  
15  
16 use was inversely correlated with age [13]. This paper also showed that the main  
17  
18 reasons for use were to maintain personal and professional connections, and to obtain  
19  
20 up-to-date information. Thompson *et al* examined Facebook use in US medical students  
21  
22 and residents, and found that 47% had Facebook accounts, and that only one-third had  
23  
24 privacy settings set sufficiently high to prevent public access. A number of accounts  
25  
26 contained material relating to substance abuse, sexism, racism, or lack of respect to  
27  
28 patients [3]. A similar study on New Zealand physicians found that 65% had Facebook  
29  
30 accounts, many of which contained public information relating to alcohol consumption,  
31  
32 sexual orientation, and religion [15]. Similar findings have also been observed in US  
33  
34 otolaryngology residents and British medical students [16]. In a recent study, 60% of US  
35  
36 medical schools reported incidents relating to the use of social networking software,  
37  
38 including breaches of patient confidentiality, profanity relating to the school, intoxication  
39  
40 or substance abuse and nudity and sexual relationships. The majority of schools had  
41  
42 issued a warning to the students involved, and a small number had dismissed a student  
43  
44 over the issue [17].  
45  
46  
47  
48  
49  
50  
51

52  
53  
54  
55 Our findings on student attitudes about posting unprofessional material are also  
56  
57  
58  
59  
60

1  
2  
3 supported by a study which used focus groups to explore the issue among US medical  
4  
5 students [18]. As in our study, students generally agreed that it was unprofessional to  
6  
7 breach patient confidentiality online, but there was less consensus about material  
8  
9 relating to alcohol, drugs, sex and speaking poorly of others. This study also found that  
10  
11 students expressed ambiguity about their use of Facebook, and “viewed online activity  
12  
13 through a lens of personal risk”, considering how what they post could be used to harm  
14  
15 them.  
16  
17  
18  
19

20  
21  
22 The types of material which our students considered problematic are congruent with  
23  
24 other work outside healthcare describing the five main “Facebook Follies” which  
25  
26 employers consider relevant when hiring new employees: negative attitudes to work,  
27  
28 profanity, alcohol, drugs, and sexual activity [19]. Students also appear to be aware of  
29  
30 the impact of their online activities, and have identified similar areas that they do not  
31  
32 wish employers to see including drinking and drugs, photographs from parties,  
33  
34 comments from friends, and comments about work [20-22].  
35  
36  
37  
38  
39

40  
41 Christofides *et al* have observed that social networking software encourages people to  
42  
43 disclose more personal information that they would otherwise do in order to remain  
44  
45 popular within a social network, but also generates concern about information control  
46  
47 and privacy [23]. Inappropriate pictures, especially of parties and drinking are a  
48  
49 common cause of concern. As they write:  
50  
51  
52  
53  
54

55 *(Online) identity ... is a social product created not only by what you share, but also by*  
56  
57  
58  
59  
60



1  
2  
3 *what others share and say about you... the people who are most popular are those*  
4  
5 *whose identity construction is most actively participated in by others... (by) limiting*  
6  
7 *access to personal information... the individual also... potentially reduces his or her*  
8  
9 *popularity. [23]*  
10  
11  
12  
13

14  
15 We hypothesize that students are faced with a difficult dilemma: wanting to share  
16  
17 information in a mixed personal/professional social network in order to remain popular,  
18  
19 while also being wary about how the material they share will make them appear and  
20  
21 who will see it. Others have also described this 'balancing act' between the need to  
22  
23 share information and the desire to manage how one's self is presented [24]. This is a  
24  
25 process of trial and error, and students express regret for the negative consequences of  
26  
27 material posted previously [25]. We believe that this process is similar to other  
28  
29 processes of conforming in healthcare education which have been described elsewhere  
30  
31  
32  
33  
34 [26].  
35  
36  
37  
38

39 Given the concerns over the use of Facebook by healthcare professions students, it is  
40  
41 surprising to find that in a recent study, only 10% of US medical schools had a policy of  
42  
43 any kind relating to social networking, and only 5 of the 132 schools studied provided  
44  
45 advice on how students could avoid posting inappropriate content [27]. The American  
46  
47 Medical Association has recently issued a report on professionalism in the use of social  
48  
49 media [28], and a number of other organizations have suggested guidelines for  
50  
51 physicians using social networking sites [29-33], but so far there is no generally-  
52  
53  
54  
55  
56  
57  
58  
59  
60  
61  
62  
63  
64  
65  
66  
67  
68  
69  
70  
71  
72  
73  
74  
75  
76  
77  
78  
79  
80  
81  
82  
83  
84  
85  
86  
87  
88  
89  
90  
91  
92  
93  
94  
95  
96  
97  
98  
99  
100  
101  
102  
103  
104  
105  
106  
107  
108  
109  
110  
111  
112  
113  
114  
115  
116  
117  
118  
119  
120  
121  
122  
123  
124  
125  
126  
127  
128  
129  
130  
131  
132  
133  
134  
135  
136  
137  
138  
139  
140  
141  
142  
143  
144  
145  
146  
147  
148  
149  
150  
151  
152  
153  
154  
155  
156  
157  
158  
159  
160  
161  
162  
163  
164  
165  
166  
167  
168  
169  
170  
171  
172  
173  
174  
175  
176  
177  
178  
179  
180  
181  
182  
183  
184  
185  
186  
187  
188  
189  
190  
191  
192  
193  
194  
195  
196  
197  
198  
199  
200  
201  
202  
203  
204  
205  
206  
207  
208  
209  
210  
211  
212  
213  
214  
215  
216  
217  
218  
219  
220  
221  
222  
223  
224  
225  
226  
227  
228  
229  
230  
231  
232  
233  
234  
235  
236  
237  
238  
239  
240  
241  
242  
243  
244  
245  
246  
247  
248  
249  
250  
251  
252  
253  
254  
255  
256  
257  
258  
259  
260  
261  
262  
263  
264  
265  
266  
267  
268  
269  
270  
271  
272  
273  
274  
275  
276  
277  
278  
279  
280  
281  
282  
283  
284  
285  
286  
287  
288  
289  
290  
291  
292  
293  
294  
295  
296  
297  
298  
299  
300  
301  
302  
303  
304  
305  
306  
307  
308  
309  
310  
311  
312  
313  
314  
315  
316  
317  
318  
319  
320  
321  
322  
323  
324  
325  
326  
327  
328  
329  
330  
331  
332  
333  
334  
335  
336  
337  
338  
339  
340  
341  
342  
343  
344  
345  
346  
347  
348  
349  
350  
351  
352  
353  
354  
355  
356  
357  
358  
359  
360  
361  
362  
363  
364  
365  
366  
367  
368  
369  
370  
371  
372  
373  
374  
375  
376  
377  
378  
379  
380  
381  
382  
383  
384  
385  
386  
387  
388  
389  
390  
391  
392  
393  
394  
395  
396  
397  
398  
399  
400  
401  
402  
403  
404  
405  
406  
407  
408  
409  
410  
411  
412  
413  
414  
415  
416  
417  
418  
419  
420  
421  
422  
423  
424  
425  
426  
427  
428  
429  
430  
431  
432  
433  
434  
435  
436  
437  
438  
439  
440  
441  
442  
443  
444  
445  
446  
447  
448  
449  
450  
451  
452  
453  
454  
455  
456  
457  
458  
459  
460  
461  
462  
463  
464  
465  
466  
467  
468  
469  
470  
471  
472  
473  
474  
475  
476  
477  
478  
479  
480  
481  
482  
483  
484  
485  
486  
487  
488  
489  
490  
491  
492  
493  
494  
495  
496  
497  
498  
499  
500  
501  
502  
503  
504  
505  
506  
507  
508  
509  
510  
511  
512  
513  
514  
515  
516  
517  
518  
519  
520  
521  
522  
523  
524  
525  
526  
527  
528  
529  
530  
531  
532  
533  
534  
535  
536  
537  
538  
539  
540  
541  
542  
543  
544  
545  
546  
547  
548  
549  
550  
551  
552  
553  
554  
555  
556  
557  
558  
559  
560  
561  
562  
563  
564  
565  
566  
567  
568  
569  
570  
571  
572  
573  
574  
575  
576  
577  
578  
579  
580  
581  
582  
583  
584  
585  
586  
587  
588  
589  
590  
591  
592  
593  
594  
595  
596  
597  
598  
599  
600  
601  
602  
603  
604  
605  
606  
607  
608  
609  
610  
611  
612  
613  
614  
615  
616  
617  
618  
619  
620  
621  
622  
623  
624  
625  
626  
627  
628  
629  
630  
631  
632  
633  
634  
635  
636  
637  
638  
639  
640  
641  
642  
643  
644  
645  
646  
647  
648  
649  
650  
651  
652  
653  
654  
655  
656  
657  
658  
659  
660  
661  
662  
663  
664  
665  
666  
667  
668  
669  
670  
671  
672  
673  
674  
675  
676  
677  
678  
679  
680  
681  
682  
683  
684  
685  
686  
687  
688  
689  
690  
691  
692  
693  
694  
695  
696  
697  
698  
699  
700  
701  
702  
703  
704  
705  
706  
707  
708  
709  
710  
711  
712  
713  
714  
715  
716  
717  
718  
719  
720  
721  
722  
723  
724  
725  
726  
727  
728  
729  
730  
731  
732  
733  
734  
735  
736  
737  
738  
739  
740  
741  
742  
743  
744  
745  
746  
747  
748  
749  
750  
751  
752  
753  
754  
755  
756  
757  
758  
759  
760  
761  
762  
763  
764  
765  
766  
767  
768  
769  
770  
771  
772  
773  
774  
775  
776  
777  
778  
779  
780  
781  
782  
783  
784  
785  
786  
787  
788  
789  
790  
791  
792  
793  
794  
795  
796  
797  
798  
799  
800  
801  
802  
803  
804  
805  
806  
807  
808  
809  
810  
811  
812  
813  
814  
815  
816  
817  
818  
819  
820  
821  
822  
823  
824  
825  
826  
827  
828  
829  
830  
831  
832  
833  
834  
835  
836  
837  
838  
839  
840  
841  
842  
843  
844  
845  
846  
847  
848  
849  
850  
851  
852  
853  
854  
855  
856  
857  
858  
859  
860  
861  
862  
863  
864  
865  
866  
867  
868  
869  
870  
871  
872  
873  
874  
875  
876  
877  
878  
879  
880  
881  
882  
883  
884  
885  
886  
887  
888  
889  
890  
891  
892  
893  
894  
895  
896  
897  
898  
899  
900  
901  
902  
903  
904  
905  
906  
907  
908  
909  
910  
911  
912  
913  
914  
915  
916  
917  
918  
919  
920  
921  
922  
923  
924  
925  
926  
927  
928  
929  
930  
931  
932  
933  
934  
935  
936  
937  
938  
939  
940  
941  
942  
943  
944  
945  
946  
947  
948  
949  
950  
951  
952  
953  
954  
955  
956  
957  
958  
959  
960  
961  
962  
963  
964  
965  
966  
967  
968  
969  
970  
971  
972  
973  
974  
975  
976  
977  
978  
979  
980  
981  
982  
983  
984  
985  
986  
987  
988  
989  
990  
991  
992  
993  
994  
995  
996  
997  
998  
999  
1000

1  
2  
3  
4  
5  
6 Some have gone so far as to suggest we need to “divorce” the personal from the  
7  
8 professional online, creating separate Facebook identities with “dual-citizenship” [34].  
9  
10 We believe that such concerns about Facebook use by healthcare professionals may be  
11  
12 excessive and that social networking software is not dangerous or something to be  
13  
14 feared, policed, or banned [35]. Others have shown that both students and educators  
15  
16 are struggling to integrate this new technology into our existing practices of teaching  
17  
18 and learning [36]. Online technologies are simply tools which are neither inherently  
19  
20 good nor bad [3 37]; in some ways, social networking technologies act as a “mirror”  
21  
22 which reflects all of our activities, including some activities we would rather not show to  
23  
24 the world [38].  
25  
26  
27  
28  
29  
30  
31

32 In response to this study, our medical school has developed a short course in which  
33  
34 students discuss their use of social media such as Facebook. This course includes a  
35  
36 review of the public appearance of the medical school class on Facebook, and also  
37  
38 provides opportunities to discuss examples of appropriate and inappropriate use of  
39  
40 social networking software among students. There is now an increased awareness of  
41  
42 the use of social networking software among students and teachers at our school, and  
43  
44 our medical students’ association has also developed a set of social media guidelines  
45  
46 for their members.  
47  
48  
49  
50  
51  
52

53 Our study was limited in several areas. Although the survey element of this study had a  
54  
55 relatively low response rate, it did gather data from a large number of students training  
56  
57  
58  
59  
60

1  
2  
3 in several different health professions, and we believe it provides an interesting  
4  
5 snapshot of attitudes to social networking software at our school across a number of  
6  
7 different faculties. The low response rate to the survey means that we cannot exclude  
8  
9 the possibility of response bias and that we cannot easily generalize our findings to the  
10  
11 whole population. Given these limitations, we believe that we have shown that use of  
12  
13 Facebook is widespread among the healthcare students we studied, and that we have  
14  
15 identified areas for education policymakers to focus on.  
16  
17  
18  
19  
20  
21

22 We believe that studies such as this are important in exploring and understanding the  
23  
24 pedagogy and practices of Facebook use and help students navigate the dilemmas  
25  
26 associated with becoming 21st century healthcare professionals.  
27  
28  
29  
30  
31  
32  
33  
34  
35  
36  
37  
38  
39  
40  
41  
42  
43  
44  
45  
46  
47  
48  
49  
50  
51  
52  
53  
54  
55  
56  
57  
58  
59  
60

1  
2  
3  
4  
5  
6 **Disclosures**  
7

8  
9 *Disclaimers*

10  
11 None  
12

13  
14 *Previous presentations*

15  
16 Previously presented at the 2012 Canadian Conference on Medical Education and  
17 published in abstract form as:  
18

19  
20  
21 Facebook Use By Healthcare Students And Faculty: Do We Need Guidelines For  
22 Online Professionalism? P Kirwan, J White, S Ross. *Medical Education* 2012; 46  
23  
24 (Suppl. 1): 53  
25  
26  
27  
28  
29  
30  
31  
32  
33  
34  
35  
36  
37  
38  
39  
40  
41  
42  
43  
44  
45  
46  
47  
48  
49  
50  
51  
52  
53  
54  
55  
56  
57  
58  
59  
60

Table 1. Respondents to the online survey

| Faculty                     | Number of respondents to the online survey | Approx response rate (%) | Female:male ratio |
|-----------------------------|--------------------------------------------|--------------------------|-------------------|
| Medicine                    | 232                                        | 33                       | 58:42             |
| Nursing                     | 200                                        | 15                       | 95:5              |
| Pharmacy                    | 82                                         | 16                       | 73:27             |
| Speech & Language Pathology | 54                                         | 24                       | 94:6              |
| Occupational Therapy        | 43                                         | 11                       | 81:19             |
| Physical Therapy            | 24                                         | 5                        | 83:17             |
| Dentistry & Dental Hygiene  | 24                                         | 8                        | 61:39             |
| Medical Laboratory Science  | 23                                         | 20                       | 78:22             |
| Total                       | 682                                        | 17                       | 77:23             |

Table 2. Representative Quotations

|                                              |                                                                                                                                                                                                                                                                                                                                                                                                                                                                                                                                                                                                                                                                                                                                                                                                                                                                                                                                                                                            |
|----------------------------------------------|--------------------------------------------------------------------------------------------------------------------------------------------------------------------------------------------------------------------------------------------------------------------------------------------------------------------------------------------------------------------------------------------------------------------------------------------------------------------------------------------------------------------------------------------------------------------------------------------------------------------------------------------------------------------------------------------------------------------------------------------------------------------------------------------------------------------------------------------------------------------------------------------------------------------------------------------------------------------------------------------|
| Patient confidentiality                      | <p>Disclosing confidential information about a patient to the general public is never permissible.</p> <p>One fellow student ... described the age of the patient, gender, and exactly what injuries they sustained in detail ... she did not disclose the name of this patient, but if my Grandma had an accident and was taken to this small rural hospital last night, it would not be hard to figure out that was who she was talking about. If you want to "debrief" to your friends on a one to one level about what you saw or experienced that it is fine. But putting it up as your "status" is inappropriate and not necessary. She was doing it so that all the other non-nurses on her friends list can see what a cool job she has. When people say they had, "the worst patient ever today", or when they discuss "helped deliver a baby in the front lobby of the hospital today".... I know if that had been me I would not want someone posting it all over Facebook.</p> |
| Activities considered unprofessional         | <p>Many students post pictures of them partying on the weekend, which could generate negative opinions about the healthcare profession because it is not the behavior expected of a professional.</p>                                                                                                                                                                                                                                                                                                                                                                                                                                                                                                                                                                                                                                                                                                                                                                                      |
| Unprofessional material observed from others | <p>A lot of nursing students share their frustrations of the faculty on Facebook, and will tell positive stories about their time at clinical.</p> <p>My most appalling example is photos of a peer with a cadaver that were posted on Facebook.</p>                                                                                                                                                                                                                                                                                                                                                                                                                                                                                                                                                                                                                                                                                                                                       |
| Unprofessional material posted by self       | <p>I have unprofessional pictures on Facebook, and don't see any conflict with this in my professional life as a soon to be registered nurse</p> <p>The odd time this has happened has been when I've been intoxicated.</p> <p>In my first career, around 5 years ago (when FB was relatively new), I posted on a colleagues wall asking about a client. I was asking in a caring manner, but still should not have. Lesson learned. Now I do not have work colleagues on my FB nor would I write about a client.</p> <p>Something inappropriate was said in class by a professor and I joined a thread poking fun at that professor. I did remove the post when I realized what I had done</p>                                                                                                                                                                                                                                                                                            |
| Unprofessional material affecting self       | <p>I'm sure a lot of the pictures of me during my undergrad could be considered unprofessional.</p>                                                                                                                                                                                                                                                                                                                                                                                                                                                                                                                                                                                                                                                                                                                                                                                                                                                                                        |
| Freedom of speech                            | <p>If patients and clients have the right to have their personal lives and information kept from being disclosed, then me being a health professional - I also have a personal life. One that is enjoyed and should be able to be enjoyed freely without interference or judgment.</p>                                                                                                                                                                                                                                                                                                                                                                                                                                                                                                                                                                                                                                                                                                     |

|                         |                                                                                                                                                                                                                                                                                                                                                                                                                                                                                                                                                                                                                                                                                                                       |
|-------------------------|-----------------------------------------------------------------------------------------------------------------------------------------------------------------------------------------------------------------------------------------------------------------------------------------------------------------------------------------------------------------------------------------------------------------------------------------------------------------------------------------------------------------------------------------------------------------------------------------------------------------------------------------------------------------------------------------------------------------------|
| Risk                    | <p>Facebook is tons of fun... but a scary place! Way too much info floating around. People can make things up, or post photos of you without your consent.</p> <p>I think one has to be very careful with Facebook, and often I don't think people realize the negative affects it can have.</p> <p>Many people can misjudge a post on a social media site or take it out of context, resulting in a false negative image for the user.</p>                                                                                                                                                                                                                                                                           |
| Control                 | <p>I have no control over who snaps a picture of me doing something in my personal life and posting them on Facebook.</p> <p>You have to be squeaky clean everywhere in life, or Facebook could be used to haunt you.</p> <p>A friend posted pictures of me and some of my other friends acting silly, and I was upset that she had not earlier asked for my consent or the consent of my friends who were against the pictures being posted, so i made her remove the pictures.</p> <p>There are photos of me being silly/drunk from earlier years of my life on Facebook, but I have untagged myself. There is nothing really bad because I would never let someone take a really unprofessional picture of me.</p> |
| Attitudes to guidelines | <p>I firmly support the idea of social media guidelines imparted by the university and/or professional licensing body.</p> <p>Some guidelines should be in place to set a standard but definitely not a list of "Don'ts" that would restrict our freedom</p> <p>Guidelines could help by making things more concrete, though in the end, I think things are up to one's professional judgment</p>                                                                                                                                                                                                                                                                                                                     |

Table 3. Types of material participants would consider unprofessional in principle if posted to Facebook

| Online behaviour                                                                                      | Percentage classifying as 'unprofessional' |
|-------------------------------------------------------------------------------------------------------|--------------------------------------------|
| Posts that disclose information about a patient/client                                                | 99                                         |
| Posts depicting illicit drug consumption                                                              | 94                                         |
| Petty criminal activity                                                                               | 91                                         |
| Photos of a patient/client                                                                            | 91                                         |
| Posts involving overt sexual content                                                                  | 86                                         |
| Attitudes of superiority or condescending behaviour (assumed because of professional status)          | 73                                         |
| Posts containing partial nudity                                                                       | 82                                         |
| Obscene gestures in photos (middle finger, etc)                                                       | 72                                         |
| Status updates describing substantial alcohol consumption at a party                                  | 69                                         |
| Pictures of an individual clearly acting drunk                                                        | 68                                         |
| Endorsements of a pharmaceutical or health product without a conflict of interest disclosure          | 58                                         |
| Critical comments about a lecturer or preceptor                                                       | 69                                         |
| Swearing or foul language                                                                             | 60                                         |
| Critical comments of course material, your program, faculty, or the university                        | 49                                         |
| Posts describing an interaction with a patient/client, that do not reveal any identifying information | 40                                         |
| Making opinionated comments about controversial issues                                                | 22                                         |
| Displaying membership in online groups dealing with controversial issues                              | 17                                         |
| A picture of an individual having one alcoholic beverage                                              | 9                                          |
| Displaying your current relationship status                                                           | 5                                          |



### Competing Interest Declaration

"All authors have completed the Unified Competing Interest form at [www.icmje.org/coi\\_disclosure.pdf](http://www.icmje.org/coi_disclosure.pdf) (available on request from the corresponding author) and declare that (1) [initials of relevant authors] have support from [name of company] for the submitted work; (2) [initials of relevant authors] have [no or specified] relationships with [name of companies] that might have an interest in the submitted work in the previous 3 years; (3) their spouses, partners, or children have [specified] financial relationships that may be relevant to the submitted work; and (4) [initials of relevant authors] have no [or specified] non-financial interests that may be relevant to the submitted work."

### Exclusive Licence Statement

"The Corresponding Author has the right to grant on behalf of all authors and does grant on behalf of all authors, an exclusive licence (or non exclusive for government employees) on a worldwide basis to the BMJ Publishing Group Ltd and its Licensees to permit this article (if accepted) to be published in BMJ editions and any other BMJPG products and sublicences to exploit all subsidiary rights, as set out in our licence ( <http://resources.bmj.com/bmj/authors/checklists-forms/licence-for-publication>)."

### Contributorship statement

All authors are justifiably credited with authorship, according to the authorship criteria. In detail:  
Jonathan White: study conception and design, analysis and interpretation of data, revising the article, final approval of the version to be published  
Paul Kirwan Wallace: data collection, analysis and interpretation of data, interviewer, input to drafts of the article, final approval of the version to be published  
Krista Lai: analysis and interpretation of data, input to drafts of the article, final approval of the version to be published  
Jennifer Walton: analysis and interpretation of data, input to drafts of the article, final approval of the version to be published  
Shelley Ross: study conception and design, analysis and interpretation of data, revising the article, final approval of the version to be published

### Acknowledgements

Funding for this project was provided University of Alberta Faculty of Medicine and Dentistry summer studentships in 2011 and 2012. We would like to acknowledge the assistance of Ms Shannon Erichsen with this project.

### Ethical Approval

Ethics approval was obtained from the University of Alberta Health Research Ethics Board (ref: 22787).

### Data sharing

Requests for original data should be directed to the corresponding author. Data sharing is governed by our local ethics board.

## Funding

University of Alberta Faculty of Medicine and Dentistry summer studentships

## REFERENCES

1. Gonzalez N. Facebook Marketing Statistics [Internet]. <http://www.checkfacebook.com>. [cited 2012 Oct 25]. Available from: <http://www.checkfacebook.com/>
2. Sandars J, Homer M, Pell G, et al. Web 2.0 and social software: the medical student way of e-learning. *Med Teacher* 2008, 30:308-312
3. Thompson LA, Dawson K, Ferdig R, et al. The Intersection of Online Social Networking with Medical Professionalism. *J Gen Int Med*. 2008;**23**:954–7.
4. Hawn C. Take Two Aspirin And Tweet Me In The Morning: How Twitter, Facebook, And Other Social Media Are Reshaping Health Care. *Health Affairs*. 2009;**28**:361–8.
5. McGowan BS, Wasko M, Vartabedian BS, et al. Understanding the Factors That Influence the Adoption and Meaningful Use of Social Media by Physicians to Share Medical Information. *J Med Internet Res*; 2012, e117.
6. Glick PL, Yamout SZ. Social media for surgeons: Understand it, embrace it, and leverage it for our profession and our patient. *Surgery*. 2012;**152**:941–2.
7. Jain SH. Practicing medicine in the age of Facebook. *N Engl J Med*. 2009 Aug 13;**361**:649–51.
8. Lagu T, Greysen SR. Physician, monitor thyself: professionalism and accountability in the use of social media. *J Clin Ethics*. 2011;**22**:187–90.
9. Cain J. Online social networking issues within academia and pharmacy education. *Am J Pharm Educ*. 2008;**72**:10.
10. Kashani R, Burwash S, Hamilton A. To be or not to be on Facebook: this is the question. *Occup Ther Now*. 2010;**12**:19–22.
11. Gorrindo T, Gorrindo PC, Groves JE. Intersection of Online Social Networking with Medical Professionalism: Can Medicine Police the Facebook Boom? *J Gen Intern Med* . 2008;**23**:2155–5.

12. Feldman MD. From the Editors' Desk: What You Don't Know Could Hurt You. *J Gen Int Med.* 2010;**25**:1139–9.
13. Giordano C, Giordano C. Health professions students' use of social media. *J Allied Health.* 2011;**40**:78–81.
14. Schulman CI, Kuchkarian FM, Withum KF, et al. Influence of social networking websites on medical school and residency selection process. *Postgraduate Medical Journal.* 2012, epub PMID 23139411
15. MacDonald J, Sohn S, Ellis P. Privacy, professionalism and Facebook: a dilemma for young doctors. *Med Educ.* 2010;**44**:805–13.
16. Golden JB, Sweeny L, Bush B, et al. Social networking and professionalism in otolaryngology residency applicants. *The Laryngoscope.* 2012;**122**:1493–6.
17. Chretien KC, Greysen SR, Chretien J-P, et al. Online posting of unprofessional content by medical students. *JAMA: The Journal of the American Medical Association.* 2009;**302**:1309–15.
18. Chretien KC, Goldman EF, Beckman L, et al. It's your own risk: medical students' perspectives on online professionalism. *Acad Med.* 2010;**85**:S68–71.
19. Karl, K. & Peluchette, J. (2009). Facebook follies: who suffers most? In C. Romm Livermore & K. Setzekorn (Eds.), *Social Networking Communities and E-Dating Services: Concepts and Implications* (pp. 212-224). Hershey, PA: IGI Global.
20. Peluchette J, Karl K. Social networking profiles: an examination of student attitudes regarding use and appropriateness of content. *Cyberpsychol Behav.* 2008;**11**:95–7.
21. Karl, K. & Peluchette, J. (2008). Students' postings on Facebook profiles: "What were they thinking?!" Proceedings of 2008 International Academy of Management and Business (pp. 1-15). San Diego, California
22. Karl K, Peluchette J, Schlagel C. A Cross-Cultural Examination of Student Attitudes and Gender Differences in Facebook Profile Content. *International Journal of Virtual Communities and Social Networking.* 2010;**2**:11-31.
23. Christofides E, Muise A, Desmarais S. Information Disclosure and Control on Facebook: Are They Two Sides of the Same Coin or Two Different Processes? *CyberPsychology & Behavior.* 2009;**12**:341–5.
24. Newman MW, Lauterbach D, Munson SA. It's not that I don't have problems, I'm just not putting them on Facebook: challenges and opportunities in using online social networks for health. Proceedings of the ACM 2011 conference on Computer Supported Cooperative Work, p.341-350.

- 1
- 2
- 3 25. Moore K. The influence of personality on Facebook usage, wall postings, and
- 4 regret. *Computers in Human Behavior*, 2012;**28**:267–274.
- 5
- 6 26. White J, Brownell K, Lemay J-F, et al. “What do they want me to say?” The
- 7 hidden curriculum at work in the medical school selection process: a qualitative
- 8 study. *BMC Med Educ*. 2012;**12**:17.
- 9
- 10 27. Kind T, Genrich G, Sodhi A, et al. Social media policies at US medical schools.
- 11 *Med Educ Online*. 2010;15.
- 12
- 13 28. Shore R, Halsey J, Shan K, et al. Report of the AMA Council on Ethical and
- 14 Judicial Affairs: Professionalism in the Use of Social Media. *J Clin Ethics*.
- 15 2011;**22**:165–72.
- 16
- 17 29. Guseh JS, Brendel RW, Brendel DH. Medical professionalism in the age of online
- 18 social networking. *J Med Ethics*. 2009;**35**:584–6.
- 19
- 20 30. Canadian Medical Association. Social media and Canadian physicians issues and
- 21 rules of engagement [Internet]. Canadian Medical Association. 2012 [cited 2012
- 22 Dec 9]. pages 1–3. Available from: [http://Social media and Canadian physicians -](http://Social media and Canadian physicians - issues and rules of engagement)
- 23 [issues and rules of engagement](http://Social media and Canadian physicians - issues and rules of engagement)
- 24
- 25 31. Australian Medical Association. Social media and the medical profession: a guide
- 26 to online professionalism for medical practitioners and medical students.
- 27 Australian Medical Association; 2010; p.1–14.
- 28
- 29 32. British Medical Association. Using social media: practical and ethical guidelines
- 30 for doctors and medical students. British Medical Association; 2012, p.1–8.
- 31
- 32 33. Doctors’ use of social media. General Medical Council; 2012, p.1–6.
- 33
- 34 34. Mostaghimi A, Crotty BH. Professionalism in the digital age. *Ann Intern Med*.
- 35 2011;**154**:560–2.
- 36
- 37 35. George DR, Green MJ. Beyond Good and Evil: Exploring Medical Trainee Use of
- 38 Social Media. *Teaching and Learning in Medicine*. 2012;**24**:155–7.
- 39
- 40 36. Gray K, Annabell L, Kennedy G. Medical students’ use of Facebook to support
- 41 learning: Insights from four case studies. *Med Teach*. 2010;**32**:971–6
- 42
- 43 37. White J, Sharma N. Podcasting: a technology, not a toy. *Adv in Health Sci Educ*.
- 44 2012;**17**:601-603.
- 45
- 46 38. Greysen SR, Kind T, Chretien KC. Online Professionalism and the Mirror of Social
- 47 Media. *J Gen Intern Med*. 2010;**25**:1227–9.
- 48
- 49
- 50
- 51
- 52
- 53
- 54
- 55
- 56
- 57
- 58
- 59
- 60

**Title**

“Have you seen what’s on Facebook?” The use of social networking software by healthcare professions students

---

**Authors**

J White, P Kirwan, K Lai, J Walton, S Ross.

**Affiliations**

J White, Associate Professor, Department of Surgery, University of Alberta.

P Kirwan, Research Assistant, Department of Surgery, University of Alberta.

K Lai, Medical Student, Department of Family Medicine, University of Alberta.

J Walton, Assistant Professor, Department of Pediatrics, University of Alberta.

S Ross, Assistant Professor, Department of Family Medicine, University of Alberta.

**Corresponding Author****Dr Jonathan White**

Address: Room 202 Community Services Centre, Royal Alexandra Hospital,  
10240 Kingsway Avenue, Edmonton AB T5H 3V9, Canada

Email: jswhite1@ualberta.ca

Phone: (780) 735-5147

Fax: (780) 735-5459

1  
2  
3  
4  
5  
6  
7  
8  
9  
10  
11  
12  
13  
14  
15  
16  
17  
18  
19  
20  
21  
22  
23  
24  
25  
26  
27  
28  
29  
30  
31  
32  
33  
34  
35  
36  
37  
38  
39  
40  
41  
42  
43  
44  
45  
46  
47  
48  
49  
50  
51  
52  
53  
54  
55  
56  
57  
58  
59  
60

### Competing Interest Declaration

"All authors have completed the Unified Competing Interest form at [www.icmje.org/coi\\_disclosure.pdf](http://www.icmje.org/coi_disclosure.pdf) (available on request from the corresponding author) and declare that (1) [initials of relevant authors] have support from [name of company] for the submitted work; (2) [initials of relevant authors] have [no or specified] relationships with [name of companies] that might have an interest in the submitted work in the previous 3 years; (3) their spouses, partners, or children have [specified] financial relationships that may be relevant to the submitted work; and (4) [initials of relevant authors] have no [or specified] non-financial interests that may be relevant to the submitted work."

### Exclusive Licence Statement

"The Corresponding Author has the right to grant on behalf of all authors and does grant on behalf of all authors, an exclusive licence (or non exclusive for government employees) on a worldwide basis to the BMJ Publishing Group Ltd and its Licensees to permit this article (if accepted) to be published in BMJ editions and any other BMJ PGL products and sublicences to exploit all subsidiary rights, as set out in our licence (<http://resources.bmj.com/bmj/authors/checklists-forms/licence-for-publication>)."

### Contributorship statement

All authors are justifiably credited with authorship, according to the authorship criteria. In detail:  
Jonathan White: study conception and design, analysis and interpretation of data, revising the article, final approval of the version to be published  
Paul Kirwan Wallace: data collection, analysis and interpretation of data, interviewer, input to drafts of the article, final approval of the version to be published  
Krista Lai: analysis and interpretation of data, input to drafts of the article, final approval of the version to be published  
Jennifer Walton: analysis and interpretation of data, input to drafts of the article, final approval of the version to be published  
Shelley Ross: study conception and design, analysis and interpretation of data, revising the article, final approval of the version to be published

### Acknowledgements

Funding for this project was provided University of Alberta Faculty of Medicine and Dentistry summer studentships in 2011 and 2012. We would like to acknowledge the assistance of Ms Shannon Erichsen with this project.

### Ethical Approval

Ethics approval was obtained from the University of Alberta Health Research Ethics Board (ref: 22787).

## ABSTRACT

**Objective.** The use of social networking software has become ubiquitous in our society. The aim of this study was to explore the attitudes and experiences of healthcare professional students using Facebook at our school, and to determine if there is a need for development of policy to assist students with utilizing this technology during their professional education.

**Design.** A mixed-methods approach was employed, using semi-structured interviews to identify important themes which were further explored using an online survey. A combination of descriptive statistics and thematic analysis was used to analyse the data obtained.

**Setting & Participants:** Students of Medicine, Nursing, Pharmacy, Speech & Language Pathology, Occupational Therapy, Physical Therapy, Dentistry, Dental Hygiene and Medical Laboratory Science at a large North American university.

**Results.** 14 interviews were analysed in-depth, and 682 healthcare professions students responded to the survey, an approximate 17% response rate. 93% reported current Facebook use. Themes identified included: patterns of use and attitudes to friendship, attitudes to online privacy, breaches of professional behaviour on Facebook, and attitudes to guidelines relating to Facebook use. A majority considered posting of the following material unprofessional: use of alcohol and drugs, crime, obscenity, patient/client information, sexual content and nudity and criticism of others. 44% reported seeing such material posted by a colleague, and 27% reported posting such

1  
2  
3  
4  
5  
6  
7  
8  
9  
10  
11  
12  
13  
14  
15  
16  
17  
18  
19  
20  
21  
22  
23  
24  
25  
26  
27  
28  
29  
30  
31  
32  
33  
34  
35  
36  
37  
38  
39  
40  
41  
42  
43  
44  
45  
46  
47  
48  
49  
50  
51  
52  
53  
54  
55  
56  
57  
58  
59  
60

material themselves. A majority of participants agreed that guidelines for Facebook use would be beneficial.

**Conclusions.** Social networking software use, specifically Facebook use, was widespread among healthcare students at our school who responded to our survey. Our results highlight some of the challenges which can accompany the use of this new technology and offer potential insights to help understand the pedagogy and practices of Facebook use in this population, and to help students navigate the dilemmas associated with becoming 21st century healthcare professionals. This study demonstrates that the use of social networking software is widespread amongst healthcare students at our school, and highlights the challenges which accompany the use of this new technology. We believe that studies such as this are important in understanding the pedagogy and practices of Facebook use and in helping students navigate the dilemmas associated with becoming 21<sup>st</sup>-century healthcare professionals.

Formatted: Font: (Default) Arial, 12 pt



1  
2  
3  
4  
5  
6  
7  
8  
9 *Article focus*

10 The use of social networking software has become ubiquitous in our society. Healthcare  
11 practitioners and their students have struggled to integrate this new technology with the  
12 expectations of professional behaviour.  
13  
14  
15

16  
17  
18 *Key messages*

- 19  
20
- 21 • Social networking software is widespread amongst healthcare students at our  
22 school. This paper highlights the challenges which accompany the use of this new  
23 technology, including the posting of unprofessional and inappropriate material  
24 online.  
25  
26
  - 27 • We discuss the dilemma of students wanting to share information in a mixed social  
28 network in order to remain popular, while also being wary about how material shared  
29 will make them appear.  
30  
31
  - 32 • We suggest that guidelines for the use of social networking software may help our  
33 students deal with this dilemma more effectively.  
34  
35  
36  
37  
38

39 *Strengths and limitations of this study*

40 Although the survey element of this study had a relatively low response rate, it did  
41 gather data from a large number of students training in several different health  
42 professions, and we believe it provides an interesting snapshot of attitudes to social  
43 networking software at our school. The low response rate to the survey means that we  
44 cannot exclude the possibility of response bias and that we cannot easily generalize our  
45 findings to the whole population. Given these limitations, we believe that we have  
46  
47  
48  
49  
50  
51  
52  
53  
54

1  
2  
3  
4  
5  
6  
7  
8  
9  
10  
11  
12  
13  
14  
15  
16  
17  
18  
19  
20  
21  
22  
23  
24  
25  
26  
27  
28  
29  
30  
31  
32  
33  
34  
35  
36  
37  
38  
39  
40  
41  
42  
43  
44  
45  
46  
47  
48  
49  
50  
51  
52  
53  
54  
55  
56  
57  
58  
59  
60

shown that use of Facebook is widespread among the healthcare students we studied,  
and that we have identified areas for education policymakers to focus on.

For peer review only

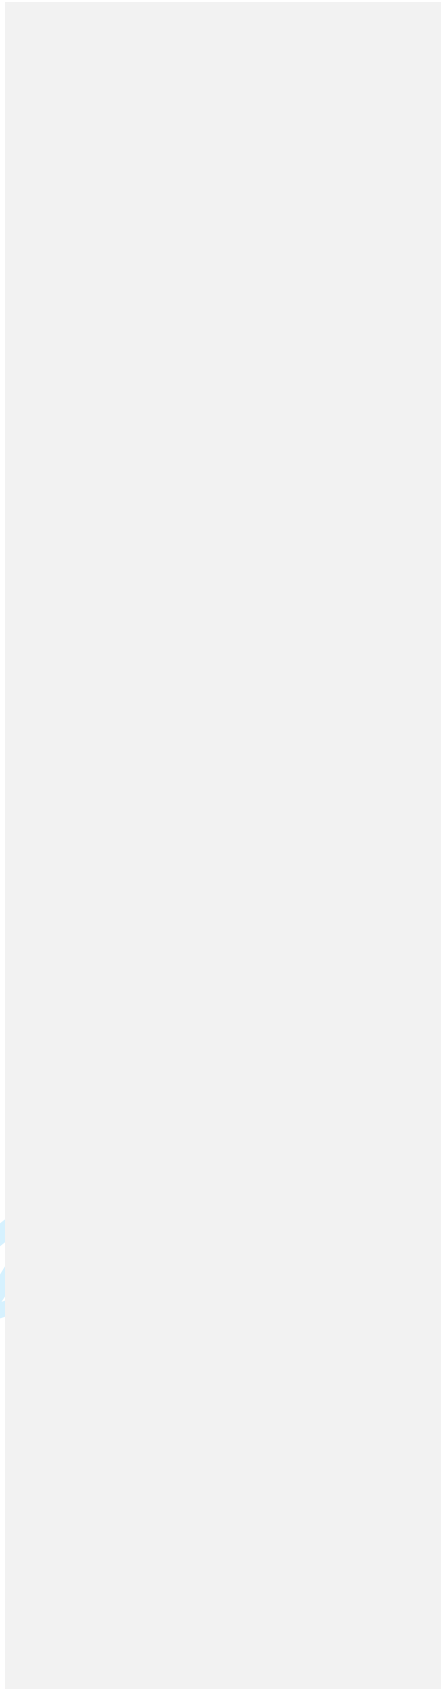

## INTRODUCTION

In recent years, the use of social networking websites such as Facebook, MySpace and Twitter has become ubiquitous in many western countries. At the time of writing, there are over 18.5 million Facebook users in Canada alone, and over 70% of the Canadian population possesses a Facebook account [1]. Facebook use is highly prevalent among medical students: at least 60% of medical students in the US, and over 70% of medical students in the UK are active users [2,3].

A number of authors have written that social networking software has the potential to revolutionize healthcare by increasing interaction between providers and clients and facilitating the free flow of information relating to healthcare [4]. A recent study among primary care physicians and oncologists demonstrated that a majority of those studied used social networking software to keep abreast of new developments in their field and to share knowledge [5]. A recent series of articles has called for surgeons to embrace social media as well [6].

Other authors have called for caution in healthcare providers engaging with social networking software. The software encourages users to share the events of their lives; for individuals training to enter the health professions, such sharing may be in conflict with requirements for confidentiality and professionalism of the profession for which they are training [7]. Some have suggested that Facebook will lead to an unacceptable blurring of the professional and the personal, and make it difficult to maintain proper

1  
2  
3  
4  
5  
6  
7  
8  
9 boundaries and professional principles [8,9]. Other authors have gone further and  
10 suggested that it may be best for healthcare providers not to engage in social  
11 networking online [10], or that Facebook use should be monitored or policed in some  
12 way [11,12].  
13  
14  
15  
16  
17

18 This study grew out of a discussion within our medical school about our own students'  
19 use of Facebook, based on a number of incidents in which we thought our students  
20 could have used Facebook more appropriately. This led to a debate about how (or  
21 indeed if) we should advise our students about using such social networking software.  
22  
23 We decided to focus on Facebook use instead of Twitter or MySpace, as this has been  
24 shown to be the most widely-adopted form of social networking software at the moment  
25 [6,13,14]. Most other studies on online social networking in healthcare education have  
26 focused on medical students, but we decided to sample a larger population to obtain a  
27 broad snapshot of the use of Facebook in all of our healthcare faculties at our school.  
28  
29  
30  
31  
32  
33  
34  
35  
36

37 The aim of this study was to explore the attitudes and experiences of healthcare  
38 professional students using Facebook at our university, with the aim of determining if  
39 there is a need for development of policy or guidelines to assist students with integrating  
40 this new technology as they progress in their education.  
41  
42  
43  
44  
45  
46  
47  
48  
49  
50  
51  
52  
53  
54

## METHODS

We employed a mixed-methods approach, conducting interviews with a small number of healthcare professions students first to identify important themes related to the use of social networking software, and then developing an online survey which was administered to a larger group.

Semi-structured interviews were conducted with 44 healthcare professions students at our university about participants' current use of social networking services. Interview questions were developed by the authors after a review of the literature (Appendix 1).

Convenience sampling was used for recruitment of interview subjects: participants were contacted through email, inviting voluntary participation in an interview. Students in nursing, medicine, dentistry, pharmacy, dental hygiene, speech and language pathology, occupational therapy and physical therapy were included in the invitation email distribution list and a single reminder email was sent. There were no specific exclusion criteria. Consent was obtained in person by the interviewer. Interviews lasted 30-45 minutes, and were designed to elicit information about participants' current use of social networking software. Interviews were audio-recorded and transcribed by a

research assistant (PK) who then analysed the transcripts ~~were then analyzed~~ to identify common themes using a simple thematic analysis approach. Two other readers (JW and SR) reviewed the transcripts to cross-check the analysis and to refine the themes identified. Consensus was reached by discussion between the three readers.

Formatted: Font: 12 pt, Not Italic

1  
2  
3  
4  
5  
6  
7  
8  
9  
10  
11  
12  
13  
14  
15  
16  
17  
18  
19  
20  
21  
22  
23  
24  
25  
26  
27  
28  
29  
30  
31  
32  
33  
34  
35  
36  
37  
38  
39  
40  
41  
42  
43  
44  
45  
46  
47  
48  
49  
50  
51  
52  
53  
54  
55  
56  
57  
58  
59  
60

Recruitment of new interview subjects was halted when data saturation was reached and no new themes emerged from new interviews. This was achieved at 14 interviews.

Themes identified from interview data were used to construct an anonymous online survey (Appendix 2). Items included a range of single-best-choice, Likert-scale, ranking and free response items. All items were revised by testing with health professions students before the survey was distributed. The survey was distributed by email to students in all of the healthcare professions listed above. Participants were contacted through email, inviting voluntary participation in the survey; participants who had been interviewed were free to respond to the survey too.

Descriptive statistics were used to describe responses to each question. Free-text responses were analyzed to identify common themes and representative quotations using the same readers and techniques described above for analysis of interview transcripts. This study reports our findings relating to students' use of Facebook, unprofessional behaviours observed online, and about the need for guidelines relating to social networking software for healthcare professionals. Ethics approval was obtained from the local Health Research Ethics Board.

## RESULTS

The study took place in fall 2011. The 14 participants who attended for interview were from the following faculties: medicine: 6, nursing: 5, pharmacy: 1, physical therapy: 1, dentistry: 1. We identified the following themes at interview: patterns of Facebook use,

1  
2  
3  
4  
5  
6  
7  
8  
9 attitudes to friendship on Facebook, attitudes to online privacy, breaches of professional  
10 behaviour posted on Facebook (including use of alcohol and drugs, crime, obscenity,  
11 patient/client information, sexual content and nudity, criticism of others) and attitudes to  
12 guidelines relating to Facebook use.  
13  
14  
15

16  
17  
18 A total of 682 students responded to the survey, a response rate of approximately 17%  
19 (estimated total number of students: 3984). The number of respondents, response rate  
20 and gender balance from each faculty are shown in Table 1. As expected, females  
21 outnumbered males in all the faculties sampled. In the following section, quotations from  
22 free-response items are presented to highlight particular themes identified, while  
23 percentages in brackets are used to indicate the proportion of respondents to the online  
24 survey who expressed agreement with a particular theme or statement observed.  
25  
26  
27  
28  
29  
30  
31 Additional representative quotations are presented in Table 2.  
32  
33

34  
35 93% of respondents reported having a Facebook account; 76% described checking  
36 their account at least 2 times per day, with 39% checking at least 5 times a day. When  
37 asked "who is on your friend list?", respondents indicated the following categories: other  
38 students 96%, previous work colleagues 73%, current work colleagues 44%, previous  
39 instructors 21%, current instructors 5%, previous patients/clients 2%, current  
40 patients/clients 0.3% .  
41  
42  
43  
44  
45  
46

47  
48 Respondents were asked to consider the types of material that they would consider  
49 unprofessional in principle if posted to Facebook (Table 3). 99% of respondents agreed  
50  
51  
52

1  
2  
3  
4  
5  
6  
7  
8  
9 that it would be unprofessional to post images or text which could be used to identify a  
10 patient. 40% of respondents said it was unprofessional to post anything at all relating to  
11 a patient/client, even without identifying information.  
12

- 13  
14  
15  
16 • *A girl I know openly posts "quotes of the day" from patients she works with in mental*  
17 *health. She does not say who said them, and they are funny, but since I work there*  
18 *too, the info is identifying. I think it crosses a line.*  
19  
20  
21

22  
23  
24 Over 80% considered posts or images relating to the following activities unprofessional:  
25 illicit drug consumption, criminal activity, overt sexual content, partial nudity and  
26 condescending or superior behaviour. At least 50% considered the following  
27 unprofessional: critical comments about a teacher, drunkenness/excessive drinking,  
28 swearing, and obscene gestures. Less than 10% objected to posts or photos depicting  
29 drinking in moderation, and to posting current relationship status.  
30  
31  
32  
33  
34  
35

- 36  
37 • *Plenty of students in my class post pictures of heavy drinking, many swear or have*  
38 *inappropriate sexual innuendo in their status updates.*  
39  
40  
41

42  
43 44% of respondents described seeing material they considered unprofessional which  
44 had been posted to Facebook by a colleague (153 responses). The most common  
45 specific examples given included criticism of teachers and programs (56 instances),  
46 inappropriate photographs (47 instances), depictions of drunkenness (27), posts about  
47 patients (21) and negative comments about patients (13). Other examples included  
48  
49  
50  
51  
52



1  
2  
3  
4  
5  
6  
7  
8  
9 parties attended (9), swearing (8), references to sex (7), inappropriate posts about work  
10 (5), negative comments about other professions (5) and consumption of illegal drugs  
11 (3). There were also descriptions of errors, negative comments about co-workers,  
12 inappropriate behaviour in uniform, nudity, criminal activity, obscene gestures, racist  
13 and sexist comments and pictures of a cadaver (1-2 of each).  
14  
15  
16  
17  
18  
19

- 20 • *I know a medical student who often posts complaints about her faculty and also*  
21 *personal patient information*  
22  
23  
24  
25

26 27% of respondents admitted to posting material which, with hindsight, they now  
27 considered unprofessional (81 responses). The most common transgressions described  
28 were posting inappropriate pictures (15 instances), swearing (13), criticizing teachers  
29 and programs (9), drinking (9), posting comments open to misinterpretation (8) and  
30 parties (5). There were 3 instances of posting sexual content, 2 posts about patients  
31 and 1 example of expressing negative views about a patient.  
32  
33  
34  
35  
36  
37  
38

- 39 • *I've wrote personal posts before that probably shouldn't have been posted.*  
40  
41  
42

43 44% described having material posted about them which they felt made them look  
44 unprofessional (137 examples). The vast majority of these instances related to the  
45 posting of photographs online (106); the most common areas of concern related to  
46 alcohol consumption (39) and attending parties (15); there were also examples of nudity  
47 (4), sexual material (3) and information pertaining to a relationship (1). 18% of  
48  
49  
50  
51  
52  
53  
54  
55  
56  
57  
58  
59  
60

1  
2  
3  
4  
5  
6  
7  
8  
9  
10  
11  
12  
13  
14  
15  
16  
17  
18  
19  
20  
21  
22  
23  
24  
25  
26  
27  
28  
29  
30  
31  
32  
33  
34  
35  
36  
37  
38  
39  
40  
41  
42  
43  
44  
45  
46  
47  
48  
49  
50  
51  
52  
53  
54  
55  
56  
57  
58  
59  
60

respondents reported that the posting of such material had made them consider withdrawing from the use of social networking software.

- *People have posted hilarious photos from parties and other events some of which depict me as being intoxicated but once again I'm hoping that due to privacy settings the general public cannot see these.*

As a group, respondents were ambiguous about posting material on Facebook. Some students considered it intrusive that faculty should even be enquiring about their Facebook use, as they considered this too personal a topic for discussion. Others expressed concern that faculty's expectations around their online activities were unreasonable. Others took the view that they should be able to post what they like as long as they could control who has access.

- *Just because we are in a health care profession does not mean that we do not have freedom of speech.*

Students expressed the view that posting material to Facebook was associated with some risk to their current position and future prospects.

- *I am aware that my behaviour in all domains affects my reputation, so I am careful about who I am seen with and what I do.*

1  
2  
3  
4  
5  
6  
7  
8  
9 Many students described censoring themselves and removing material they had posted  
10 or been tagged in previously, or requesting to have their name removed from photos  
11 posted by other users.  
12

- 13  
14 • *I went through my Facebook photos and took down the photos I had posted with*  
15 *me in party pictures from my first undergrad degree. If I even looked drunk or*  
16 *questionable, or if the party had a funny, (but inappropriate theme) then I took*  
17 *those pictures down as well. I don't generally post a lot of comments, and none*  
18 *that I regret, but a picture is still worth a thousand words.*  
19  
20  
21  
22  
23

24  
25  
26 98% of respondents described having altered the privacy settings of their Facebook  
27 account on at least one occasion; the reasons given for this included protection from  
28 strangers 99%, not trusting Facebook 62%, risk of viewing by potential employers 52%,  
29 advice from peers 30%, and advice from instructors 17%.  
30  
31  
32

- 33  
34  
35 • *I don't really understand the privacy settings, so I just made them strict, just in case.*  
36  
37 • *I don't post anything on Facebook that could compromise me for work in any way.*  
38  
39

40  
41 Lastly, respondents were asked about the use of guidelines relating to the use of social  
42 networking software in health professions education. Many were unfamiliar with existing  
43 guidelines (43%); only 15% agreed that existing guidelines were adequate. A majority  
44 agreed that guidelines would be beneficial: 79% agreed that others would benefit, and  
45  
46  
47  
48  
49 62% stated they would benefit personally.  
50

- 1  
2  
3  
4  
5  
6  
7  
8
- 9 • *There are certain guidelines that I think any professional or role model should follow:*  
10 *no photos of inappropriate conduct (nudity, heavy drinking, sexual content, etc),*  
11 *patients/clients should not be added as friends or be able to view photos,*  
12 *confidential information remains confidential.. otherwise, if people are stupid enough*  
13 *to jeopardize their profession by posting something on facebook, they should deal*  
14 *with the consequences (losing a current or potential job, etc)*
- 15  
16  
17  
18  
19  
20  
21  
22  
23

## 24 DISCUSSION

25  
26  
27  
28 This study showed that social networking software use, specifically Facebook use, was  
29 widespread among the healthcare students at our school who responded to our survey.  
30 Our results highlight some of the challenges which can accompany the use of this new  
31 technology and offer potential insights to help understand the pedagogy and practices  
32 of Facebook use in this population, and to help students navigate the dilemmas  
33 associated with becoming 21st century healthcare professionals.

34  
35  
36  
37  
38  
39 ~~This study demonstrates that the use of social networking software is widespread~~  
40 ~~amongst students in the healthcare professions at our university and highlights some of~~  
41 ~~the dilemmas which accompany the use of this new technology.~~  
42  
43  
44

45  
46  
47 There was widespread agreement that posting material that can identify a patient/client  
48 should be considered unprofessional, as should material relating to drugs, sex, nudity,  
49 drunkenness, crime and obscenity. A majority also considered it unprofessional to post  
50  
51  
52  
53  
54

1  
2  
3  
4  
5  
6  
7  
8  
9 critical comments about teachers/programs and posts which could be considered  
10 condescending. Despite these stated understandings, nearly half of the students we  
11 studied reporting seeing their colleagues posting unprofessional material on Facebook,  
12 and over a quarter reported posting such material themselves. There was a wide range  
13 of transgressions reported, including criticism of teachers/programs, posting of  
14 inappropriate photographs, drunkenness, parties and swearing.  
15  
16  
17  
18  
19

20  
21  
22 Our findings agree with other recent papers in the field. A study by Giordano &  
23 Giordano on healthcare students found that 77% of students used Facebook, and that  
24 use was inversely correlated with age [13]. This paper also showed that the main  
25 reasons for use were to maintain personal and professional connections, and to obtain  
26 up-to-date information. Thompson *et al* examined Facebook use in US medical students  
27 and residents, and found that 47% had Facebook accounts, and that only one-third had  
28 privacy settings set sufficiently high to prevent public access. A number of accounts  
29 contained material relating to substance abuse, sexism, racism, or lack of respect to  
30 patients [3]. A similar study on New Zealand physicians found that 65% had Facebook  
31 accounts, many of which contained public information relating to alcohol consumption,  
32 sexual orientation, and religion [15]. Similar findings have also been observed in US  
33 otolaryngology residents and British medical students [16]. In a recent study, 60% of US  
34 medical schools reported incidents relating to the use of social networking software,  
35 including breaches of patient confidentiality, profanity relating to the school, intoxication  
36 or substance abuse and nudity and sexual relationships. The majority of schools had  
37 issued a warning to the students involved, and a small number had dismissed a student  
38  
39  
40  
41  
42  
43  
44  
45  
46  
47  
48  
49  
50  
51  
52  
53  
54  
55  
56  
57  
58  
59  
60

1  
2  
3  
4  
5  
6  
7  
8  
9  
10  
11  
12  
13  
14  
15  
16  
17  
18  
19  
20  
21  
22  
23  
24  
25  
26  
27  
28  
29  
30  
31  
32  
33  
34  
35  
36  
37  
38  
39  
40  
41  
42  
43  
44  
45  
46  
47  
48  
49  
50  
51  
52  
53  
54  
55  
56  
57  
58  
59  
60

over the issue [17].

Our findings on student attitudes about posting unprofessional material are also supported by a study which used focus groups to explore the issue among US medical students [18]. As in our study, students generally agreed that it was unprofessional to breach patient confidentiality online, but there was less consensus about material relating to alcohol, drugs, sex and speaking poorly of others. This study also found that students expressed ambiguity about their use of Facebook, and “viewed online activity through a lens of personal risk”, considering how what they post could be used to harm them.

The types of material which our students considered problematic are congruent with other work outside healthcare describing the five main “Facebook Follies” which employers consider relevant when hiring new employees: negative attitudes to work, profanity, alcohol, drugs, and sexual activity [19]. Students also appear to be aware of the impact of their online activities, and have identified similar areas that they do not wish employers to see including drinking and drugs, photographs from parties, comments from friends, and comments about work [20-22].

Christofides *et al* have observed that social networking software encourages people to disclose more personal information than they would otherwise do in order to remain popular within a social network, but also generates concern about information control and privacy [23]. Inappropriate pictures, especially of parties and drinking are a

1  
2  
3  
4  
5  
6  
7  
8  
9 common cause of concern. As they write:

10  
11  
12 *(Online) identity ... is a social product created not only by what you share, but also by*  
13 *what others share and say about you... the people who are most popular are those*  
14 *whose identity construction is most actively participated in by others... (by) limiting*  
15 *access to personal information... the individual also... potentially reduces his or her*  
16 *popularity. [23]*  
17  
18  
19  
20  
21  
22  
23

24 We hypothesize that students are faced with a difficult dilemma: wanting to share  
25 information in a mixed personal/professional social network in order to remain popular,  
26 while also being wary about how the material they share will make them appear and  
27 who will see it. Others have also described this 'balancing act' between the need to  
28 share information and the desire to manage how one's self is presented [24]. This is a  
29 process of trial and error, and students express regret for the negative consequences of  
30 material posted previously [25]. We believe that this process is similar to other  
31 processes of conforming in healthcare education which have been described elsewhere  
32 [26].  
33  
34  
35  
36  
37  
38  
39  
40  
41  
42

43 Given the concerns over the use of Facebook by healthcare professions students, it is  
44 surprising to find that in a recent study, only 10% of US medical schools had a policy of  
45 any kind relating to social networking, and only 5 of the 132 schools studied provided  
46 advice on how students could avoid posting inappropriate content [27]. The American  
47 Medical Association has recently issued a report on professionalism in the use of social  
48  
49  
50  
51  
52  
53  
54

1  
2  
3  
4  
5  
6  
7  
8  
9  
10  
11  
12  
13  
14  
15  
16  
17  
18  
19  
20  
21  
22  
23  
24  
25  
26  
27  
28  
29  
30  
31  
32  
33  
34  
35  
36  
37  
38  
39  
40  
41  
42  
43  
44  
45  
46  
47  
48  
49  
50  
51  
52  
53  
54  
55  
56  
57  
58  
59  
60

media [28], and a number of other organizations have suggested guidelines for physicians using social networking sites [29-33], but so far there is no generally-accepted policy for students of the health professions.

Some have gone so far as to suggest we need to “divorce” the personal from the professional online, creating separate Facebook identities with “dual-citizenship” [34]. We believe that such concerns about Facebook use by healthcare professionals may be excessive and that social networking software is not dangerous or something to be feared, policed, or banned [35]. Others have shown that both students and educators are struggling to integrate this new technology into our existing practices of teaching and learning [36]. Online technologies are simply tools which are neither inherently good nor bad [3 37]; in some ways, social networking technologies act as a “mirror” which reflects all of our activities, including some activities we would rather not show to the world [38].

[In response to this study, our medical school has developed a short course in which students discuss their use of social media such as Facebook. This course includes a review of the public appearance of the medical school class on Facebook, and also provides opportunities to discuss examples of appropriate and inappropriate use of social networking software among students. There is now an increased awareness of the use of social networking software among students and teachers at our school, and our medical students' association has also developed a set of social media guidelines for their members.](#)



1  
2  
3  
4  
5  
6  
7  
8  
9  
10  
11 Our study was limited in several areas. Although the survey element of this study had a  
12 relatively low response rate, it did gather data from a large number of students training  
13 in several different health professions, and we believe it provides an interesting  
14 snapshot of attitudes to social networking software at our school across a number of  
15 different faculties. The low response rate to the survey means that we cannot exclude  
16 the possibility of response bias and that we cannot easily generalize our findings to the  
17 whole population. Given these limitations, we believe that we have shown that use of  
18 Facebook is widespread among the healthcare students we studied, and that we have  
19 identified areas for education policymakers to focus on.  
20  
21  
22  
23  
24  
25  
26  
27  
28

29 We believe that studies such as this are important in exploring and understanding the  
30 pedagogy and practices of Facebook use and help students navigate the dilemmas  
31 associated with becoming 21st century healthcare professionals.  
32  
33  
34  
35  
36  
37  
38  
39  
40  
41  
42  
43  
44  
45  
46  
47  
48  
49  
50  
51  
52  
53  
54

1  
2  
3  
4  
5  
6  
7  
8  
9  
10  
11  
12  
13  
14  
15  
16  
17  
18  
19  
20  
21  
22  
23  
24  
25  
26  
27  
28  
29  
30  
31  
32  
33  
34  
35  
36  
37  
38  
39  
40  
41  
42  
43  
44  
45  
46  
47  
48  
49  
50  
51  
52  
53  
54  
55  
56  
57  
58  
59  
60

## Disclosures

### *Disclaimers*

None

### *Previous presentations*

Previously presented at the 2012 Canadian Conference on Medical Education and published in abstract form as:

Facebook Use By Healthcare Students And Faculty: Do We Need Guidelines For Online Professionalism? P Kirwan, J White, S Ross. *Medical Education* 2012; 46 (Suppl. 1): 53

Table 1. Respondents to the online survey

| Faculty                     | Number of respondents to the online survey | Approx response rate (%) | Female:male ratio |
|-----------------------------|--------------------------------------------|--------------------------|-------------------|
| Medicine                    | 232                                        | 33                       | 58:42             |
| Nursing                     | 200                                        | 15                       | 95:5              |
| Pharmacy                    | 82                                         | 16                       | 73:27             |
| Speech & Language Pathology | 54                                         | 24                       | 94:6              |
| Occupational Therapy        | 43                                         | 11                       | 81:19             |
| Physical Therapy            | 24                                         | 5                        | 83:17             |
| Dentistry & Dental Hygiene  | 24                                         | 8                        | 61:39             |
| Medical Laboratory Science  | 23                                         | 20                       | 78:22             |
| Total                       | 682                                        | 17                       | 77:23             |

Table 2. Representative Quotations

|                                              |                                                                                                                                                                                                                                                                                                                                                                                                                                                                                                                                                                                                                                                                                                                                                                                                                                                                                                                                                                                            |
|----------------------------------------------|--------------------------------------------------------------------------------------------------------------------------------------------------------------------------------------------------------------------------------------------------------------------------------------------------------------------------------------------------------------------------------------------------------------------------------------------------------------------------------------------------------------------------------------------------------------------------------------------------------------------------------------------------------------------------------------------------------------------------------------------------------------------------------------------------------------------------------------------------------------------------------------------------------------------------------------------------------------------------------------------|
| Patient confidentiality                      | <p>Disclosing confidential information about a patient to the general public is never permissible.</p> <p>One fellow student ... described the age of the patient, gender, and exactly what injuries they sustained in detail ... she did not disclose the name of this patient, but if my Grandma had an accident and was taken to this small rural hospital last night, it would not be hard to figure out that was who she was talking about. If you want to "debrief" to your friends on a one to one level about what you saw or experienced that it is fine. But putting it up as your "status" is inappropriate and not necessary. She was doing it so that all the other non-nurses on her friends list can see what a cool job she has. When people say they had, "the worst patient ever today", or when they discuss "helped deliver a baby in the front lobby of the hospital today".... I know if that had been me I would not want someone posting it all over Facebook.</p> |
| Activities considered unprofessional         | <p>Many students post pictures of them partying on the weekend, which could generate negative opinions about the healthcare profession because it is not the behavior expected of a professional.</p>                                                                                                                                                                                                                                                                                                                                                                                                                                                                                                                                                                                                                                                                                                                                                                                      |
| Unprofessional material observed from others | <p>A lot of nursing students share their frustrations of the faculty on Facebook, and will tell positive stories about their time at clinical.</p> <p>My most appalling example is photos of a peer with a cadaver that were posted on Facebook.</p>                                                                                                                                                                                                                                                                                                                                                                                                                                                                                                                                                                                                                                                                                                                                       |
| Unprofessional material posted by self       | <p>I have unprofessional pictures on Facebook, and don't see any conflict with this in my professional life as a soon to be registered nurse</p> <p>The odd time this has happened has been when I've been intoxicated.</p> <p>In my first career, around 5 years ago (when FB was relatively new), I posted on a colleagues wall asking about a client. I was asking in a caring manner, but still should not have. Lesson learned. Now I do not have work colleagues on my FB nor would I write about a client.</p> <p>Something inappropriate was said in class by a professor and I joined a thread poking fun at that professor. I did remove the post when I realized what I had done</p>                                                                                                                                                                                                                                                                                            |
| Unprofessional material affecting self       | <p>I'm sure a lot of the pictures of me during my undergrad could be considered unprofessional.</p>                                                                                                                                                                                                                                                                                                                                                                                                                                                                                                                                                                                                                                                                                                                                                                                                                                                                                        |
| Freedom of speech                            | <p>If patients and clients have the right to have their personal lives and information kept from being disclosed, then me being a health professional - I also have a personal life. One that is enjoyed and should be able to be enjoyed freely without interference or judgment.</p>                                                                                                                                                                                                                                                                                                                                                                                                                                                                                                                                                                                                                                                                                                     |

|                         |                                                                                                                                                                                                                                                                                                                                                                                                                                                                                                                                                                                                                                                                                                                       |
|-------------------------|-----------------------------------------------------------------------------------------------------------------------------------------------------------------------------------------------------------------------------------------------------------------------------------------------------------------------------------------------------------------------------------------------------------------------------------------------------------------------------------------------------------------------------------------------------------------------------------------------------------------------------------------------------------------------------------------------------------------------|
| Risk                    | <p>Facebook is tons of fun... but a scary place! Way too much info floating around. People can make things up, or post photos of you without your consent.</p> <p>I think one has to be very careful with Facebook, and often I don't think people realize the negative affects it can have.</p> <p>Many people can misjudge a post on a social media site or take it out of context, resulting in a false negative image for the user.</p>                                                                                                                                                                                                                                                                           |
| Control                 | <p>I have no control over who snaps a picture of me doing something in my personal life and posting them on Facebook.</p> <p>You have to be squeaky clean everywhere in life, or Facebook could be used to haunt you.</p> <p>A friend posted pictures of me and some of my other friends acting silly, and I was upset that she had not earlier asked for my consent or the consent of my friends who were against the pictures being posted, so i made her remove the pictures.</p> <p>There are photos of me being silly/drunk from earlier years of my life on Facebook, but I have untagged myself. There is nothing really bad because I would never let someone take a really unprofessional picture of me.</p> |
| Attitudes to guidelines | <p>I firmly support the idea of social media guidelines imparted by the university and/or professional licensing body.</p> <p>Some guidelines should be in place to set a standard but definitely not a list of "Don'ts" that would restrict our freedom</p> <p>Guidelines could help by making things more concrete, though in the end, I think things are up to one's professional judgment</p>                                                                                                                                                                                                                                                                                                                     |

1  
2  
3  
4  
5  
6  
7  
8  
9  
10  
11  
12  
13  
14  
15  
16  
17  
18  
19  
20  
21  
22  
23  
24  
25  
26  
27  
28  
29  
30  
31  
32  
33  
34  
35  
36  
37  
38  
39  
40  
41  
42  
43  
44  
45  
46  
47  
48  
49  
50  
51  
52  
53  
54  
55  
56  
57  
58  
59  
60

Table 3. Types of material participants would consider unprofessional in principle if posted to Facebook

| Online behaviour                                                                                      | Percentage classifying as 'unprofessional' |
|-------------------------------------------------------------------------------------------------------|--------------------------------------------|
| Posts that disclose information about a patient/client                                                | 99                                         |
| Posts depicting illicit drug consumption                                                              | 94                                         |
| Petty criminal activity                                                                               | 91                                         |
| Photos of a patient/client                                                                            | 91                                         |
| Posts involving overt sexual content                                                                  | 86                                         |
| Attitudes of superiority or condescending behaviour (assumed because of professional status)          | 73                                         |
| Posts containing partial nudity                                                                       | 82                                         |
| Obscene gestures in photos (middle finger, etc)                                                       | 72                                         |
| Status updates describing substantial alcohol consumption at a party                                  | 69                                         |
| Pictures of an individual clearly acting drunk                                                        | 68                                         |
| Endorsements of a pharmaceutical or health product without a conflict of interest disclosure          | 58                                         |
| Critical comments about a lecturer or preceptor                                                       | 69                                         |
| Swearing or foul language                                                                             | 60                                         |
| Critical comments of course material, your program, faculty, or the university                        | 49                                         |
| Posts describing an interaction with a patient/client, that do not reveal any identifying information | 40                                         |
| Making opinionated comments about controversial issues                                                | 22                                         |
| Displaying membership in online groups dealing with controversial issues                              | 17                                         |
| A picture of an individual having one alcoholic beverage                                              | 9                                          |
| Displaying your current relationship status                                                           | 5                                          |

## REFERENCES

1. Gonzalez N. Facebook Marketing Statistics [Internet]. <http://www.checkfacebook.com>. [cited 2012 Oct 25]. Available from: <http://www.checkfacebook.com/>
2. Sandars J, Homer M, Pell G, Croker T. Web 2.0 and social software: the medical student way of e-learning. *Med Teacher* 2008, 30:308-312
3. Thompson LA, Dawson K, Ferdig R, Black EW, Boyer J, Coutts J, et al. The Intersection of Online Social Networking with Medical Professionalism. *J Gen Int Med*. 2008;**23**:954–7.
4. Hawn C. Take Two Aspirin And Tweet Me In The Morning: How Twitter, Facebook, And Other Social Media Are Reshaping Health Care. *Health Affairs*. 2009;**28**:361–8.
5. McGowan BS, Wasko M, Vartabedian BS, Miller RS, Freiherr DD, Abdolrasulnia M. Understanding the Factors That Influence the Adoption and Meaningful Use of Social Media by Physicians to Share Medical Information. *J Med Internet Res*; 2012, e117.
6. Glick PL, Yamout SZ. Social media for surgeons: Understand it, embrace it, and leverage it for our profession and our patient. *Surgery*. 2012;**152**:941–2.
7. Jain SH. Practicing medicine in the age of Facebook. *N Engl J Med*. 2009 Aug 13;**361**:649–51.
8. Lagu T, Greysen SR. Physician, monitor thyself: professionalism and accountability in the use of social media. *J Clin Ethics*. 2011;**22**:187–90.
9. Cain J. Online social networking issues within academia and pharmacy education. *Am J Pharm Educ*. 2008;**72**:10.
10. Kashani R, Burwash S, Hamilton A. To be or not to be on Facebook: this is the question. *Occup Ther Now*. 2010;**12**:19–22.
11. Gorrindo T, Gorrindo PC, Groves JE. Intersection of Online Social Networking with Medical Professionalism: Can Medicine Police the Facebook Boom? *J Gen Intern Med* . 2008;**23**:2155–5.
12. Feldman MD. From the Editors' Desk: What You Don't Know Could Hurt You. *J Gen Int Med*. 2010;**25**:1139–9.
13. Giordano C, Giordano C. Health professions students' use of social media. *J Allied Health*. 2011;**40**:78–81.

1  
2  
3  
4  
5  
6  
7  
8  
9  
10  
11  
12  
13  
14  
15  
16  
17  
18  
19  
20  
21  
22  
23  
24  
25  
26  
27  
28  
29  
30  
31  
32  
33  
34  
35  
36  
37  
38  
39  
40  
41  
42  
43  
44  
45  
46  
47  
48  
49  
50  
51  
52  
53  
54  
55  
56  
57  
58  
59  
60

14. Schulman CI, Kuchkarian FM, Withum KF, Boecker FS, Graygo JM. Influence of social networking websites on medical school and residency selection process. *Postgraduate Medical Journal*. 2012, epub PMID 23139411
15. MacDonald J, Sohn S, Ellis P. Privacy, professionalism and Facebook: a dilemma for young doctors. *Med Educ*. 2010;**44**:805–13.
16. Golden JB, Sweeny L, Bush B, Carroll WR. Social networking and professionalism in otolaryngology residency applicants. *The Laryngoscope*. 2012;**122**:1493–6.
17. Chretien KC, Greysen SR, Chretien J-P, Kind T. Online posting of unprofessional content by medical students. *JAMA: The Journal of the American Medical Association*. 2009;**302**:1309–15.
18. Chretien KC, Goldman EF, Beckman L, Kind T. It's your own risk: medical students' perspectives on online professionalism. *Acad Med*. 2010;**85**:S68–71.
19. Karl, K. & Peluchette, J. (2009). Facebook follies: who suffers most? In C. Romm Livermore & K. Setzekorn (Eds.), *Social Networking Communities and E-Dating Services: Concepts and Implications* (pp. 212-224). Hershey, PA: IGI Global.
20. Peluchette J, Karl K. Social networking profiles: an examination of student attitudes regarding use and appropriateness of content. *Cyberpsychol Behav*. 2008;**11**:95–7.
21. Karl, K. & Peluchette, J. (2008). Students' postings on Facebook profiles: "What were they thinking?!" Proceedings of 2008 International Academy of Management and Business (pp. 1-15). San Diego, California
22. Karl K, Peluchette J, Schlagel C. A Cross-Cultural Examination of Student Attitudes and Gender Differences in Facebook Profile Content. *International Journal of Virtual Communities and Social Networking*. 2010;**2**:11-31.
23. Christofides E, Muise A, Desmarais S. Information Disclosure and Control on Facebook: Are They Two Sides of the Same Coin or Two Different Processes? *CyberPsychology & Behavior*. 2009;**12**:341–5.
24. Newman MW, Lauterbach D, Munson SA. It's not that I don't have problems, I'm just not putting them on Facebook: challenges and opportunities in using online social networks for health. Proceedings of the ACM 2011 conference on Computer Supported Cooperative Work, p.341-350.
25. Moore K. The influence of personality on Facebook usage, wall postings, and regret. *Computers in Human Behavior*, 2012;**28**:267–274.
26. White J, Brownell K, Lemay J-F, Lockyer JM. "What do they want me to say?" The



- 1  
2  
3  
4  
5  
6  
7  
8  
9 hidden curriculum at work in the medical school selection process: a qualitative  
10 study. *BMC Med Educ.* 2012;**12**:17.
- 11 27. Kind T, Genrich G, Sodhi A, Chretien KC. Social media policies at US medical  
12 schools. *Med Educ Online.* 2010;15.
- 13  
14 28. Shore R, Halsey J, Shan K, Crigger B-J, Douglas SP. Report of the AMA Council  
15 on Ethical and Judicial Affairs: Professionalism in the Use of Social Media. *J Clin  
16 Ethics.* 2011;**22**:165–72.
- 17  
18 29. Guseh JS, Brendel RW, Brendel DH. Medical professionalism in the age of online  
19 social networking. *J Med Ethics.* 2009;**35**:584–6.
- 20  
21 30. Canadian Medical Association. Social media and Canadian physicians issues and  
22 rules of engagement [Internet]. Canadian Medical Association. 2012 [cited 2012  
23 Dec 9]. pages 1–3. Available from: [http://Social media and Canadian physicians -  
24 issues and rules of engagement](http://Social media and Canadian physicians - issues and rules of engagement)
- 25  
26 31. Australian Medical Association. Social media and the medical profession: a guide  
27 to online professionalism for medical practitioners and medical students.  
28 Australian Medical Association; 2010; p.1–14.
- 29  
30 32. British Medical Association. Using social media: practical and ethical guidelines  
31 for doctors and medical students. British Medical Association; 2012, p.1–8.
- 32  
33 33. Doctors' use of social media. General Medical Council; 2012, p.1–6.
- 34  
35 34. Mostaghimi A, Crotty BH. Professionalism in the digital age. *Ann Intern Med.*  
36 2011;**154**:560–2.
- 37  
38 35. George DR, Green MJ. Beyond Good and Evil: Exploring Medical Trainee Use of  
39 Social Media. *Teaching and Learning in Medicine.* 2012;**24**:155–7.
- 40  
41 36. Gray K, Annabell L, Kennedy G. Medical students' use of Facebook to support  
42 learning: Insights from four case studies. *Med Teach.* 2010;**32**:971–6
- 43  
44 37. White J, Sharma N. Podcasting: a technology, not a toy. *Adv in Health Sci Educ.*  
45 2012;**17**:601-603.
- 46  
47 38. Greysen SR, Kind T, Chretien KC. Online Professionalism and the Mirror of Social  
48 Media. *J Gen Intern Med.* 2010;**25**:1227–9.
- 49  
50  
51  
52  
53  
54  
55  
56  
57  
58  
59  
60

## Interview script

## “Are You on Facebook?”

First of all, thank you for agreeing to meet with me in order to take part in this study! Just to remind you, this study deals with the social networking site Facebook, and the role that it currently plays in healthcare professions education.

We have asked to meet with you in order to conduct an in-person interview, so that we can better understand your experiences as a user of Facebook, as well as your beliefs and attitudes surrounding its use in relation to the healthcare professions. We hope to learn about any factors that may have led you to begin, discontinue or refuse ever to use Facebook as a student or medical professional, and also understand any benefits or drawbacks that you might believe exist for those using this popular social networking site.

I also want to make you aware that this interview will be recorded and transcribed so that we are as accurate as possible in our data collection; however, your anonymity will be protected and your identity will in no way be associated with any of the answers that you provide.

Before we begin, please take your time to read the following information sheet and sign the consent form. By consenting to participate in this study you are allowing us to record and transcribe this interview as well as to analyze and, in the future, both publish and present the data we gather today.

Thank you.

Alright, let's begin:

- 1) Do you currently or have you ever had a personal Facebook account?
- 2) How often do you log on to Facebook? (Number of times per day, week, month, etc)
- 3) What would you say is the main purpose of your Facebook use (personal relationships, work relationships, staying in contact with family, sharing of educational information, etc.)?
- 4) Can you tell me what sorts of people are on your friends list on Facebook?
  - Family
  - Personal friends
  - Work colleagues
  - Fellow students
  - Teachers
  - Patients
  - Online friends I have never met in person
- 5) Do you think Facebook use has provided any benefits or opportunities to you as a student or professional other than personal/social communication?

Can you elaborate on that? (ask, if you feel it's necessary)

- 6) What about any motivating factors to use Facebook for educational purposes?

(Suggestions to use as prompts, possible examples: Inadequate classroom instruction, structure of teaching and assessment (piecing together individual work for a common exam), learning in different educational settings, tutorial group learning, etc.)

7) As a student/teacher, have you ever engaged with one of your teachers/students on Facebook?

8) As a student/teacher, have you ever engaged with other students or colleagues *at another university* through social networking sites? What was the nature or purpose of this communication?

9) As a student engaged in some kind of educational group on Facebook, have you or your fellow members ever invited or sought to involve any of your instructors? Why or why not?

10) As an instructor or preceptor in the medical field, have you ever sought to create a space for sharing information using social networking tools? Why or why not? Have students ever approached you about this matter or invited you to join them in some way on these sites?

11) What do you believe are some dangers that exist for professional members of the community using these social media websites?

12) Do you think that there are many people that agree with your opinions on Facebook use within the medical community or the student body? What about those who might oppose your views? Are there any particular demographics you think would support/oppose you?

13) In regards to any dangers or negative aspects you may have mentioned for Facebook use by healthcare professionals, do you feel the current guidelines or recommendations to protect users is adequate? If not, what kind of changes would you recommend?

14) What types of things would you recommend to include in a set of regulations that govern the appropriate use of sites like Facebook by students and medical professionals alike?

15) Do you have any other additional comments regarding your experiences as a user of Facebook?

Thank you once again for taking part in this study. Your responses to the questions I asked today will be invaluable to our ongoing research. As mentioned before, if you have any additional questions regarding the study please contact Dr. White or Dr. Ross.

Have a great day!

# Facebook in Healthcare Education

## Welcome Page and Consent

Facebook in Healthcare Education

Online Survey

For All Students, Instructors and Faculty Members in Health Professions Education at the University of Alberta

Thank you for taking the time to log on and complete this online survey!

This study deals with the social networking site Facebook, and the role that it currently plays in healthcare education.

The purpose of creating this survey was so that we can better understand your experiences as a user of Facebook, as well as your beliefs and attitudes surrounding its use in relation to the healthcare professions. We hope to learn about any factors that may have led you to begin, discontinue or refuse ever to use Facebook as a student or medical professional, and also understand any benefits or drawbacks that you might believe exist for those using this popular social networking site.

Please understand that by continuing beyond this point and completing this brief survey, you are acknowledging that you are aware your answers will be analyzed and, perhaps in the future, published as a way of presenting our findings. However, you can be certain that your anonymity will be protected and your identity will in no way be associated with any of the answers that you provide in this survey.

Thank you.

## Section I: Demographic Information

### 1. What is your age?

- 18-20
- 21-25
- 26-30
- 31-40
- 41-50
- 51-60
- Over 60

### 2. Sex:

- Male
- Female

## Facebook in Healthcare Education

### 3. What is your role/ title at the University?

- Student
- Professor/ lecturer
- Administrator
- Faculty assistant

Other (please specify)

### 4. What program are you affiliated with?

- Nursing
- Medicine
- Dentistry
- Dental Hygiene
- Pharmacy
- Medical Laboratory Science
- Occupational Therapy
- Physical Therapy
- Speech Language Pathology

Other (please specify)

## Section II: Facebook Use

### 5. Do you currently have a Facebook account?

- Yes
- No

## Section II: Facebook Use Continued

## Facebook in Healthcare Education

### 6. Approximately how often do you check your Facebook account?

- More than 10 times/day
- 5-10 times/day
- 2-4 times a day
- Once/day
- 2-3 times/week
- Once/week or less

### 7. How do you most often access Facebook?

- On a desktop computer
- On a laptop
- On my phone
- Other (please specify)

### 8. When you check your account, how long do you spend each time?

- 0-5 minutes
- 5-10 minutes
- 10-30 minutes
- 30-60 minutes
- More than 1 hour

### 9. How selective are you in accepting 'Friend Requests' on Facebook?

- I only accept requests from people I know well and family members
- I accept requests from people I have met in person a few times
- I accept requests from people I have only met once
- If I recognize their name or share a few mutual friends, I will accept them, even though we have never met in person
- I accept friend requests from people I have never met in person and don't really know

# Facebook in Healthcare Education

## 10. At the moment, who is on your Friends list on Facebook? (Please check all that apply)

- Undergraduate students
- Residents/postgraduate trainees
- Current instructors
- Previous instructors
- Current Work Colleagues
- Previous Work Colleagues
- Current Patients/Clients
- Previous Patients/Clients

## 11. If a patient/client sent you a friend request, would you accept?

- Yes
- No
- Maybe (please explain)

## 12. People use Facebook for many different purposes. To what extent do you use Facebook for the following purposes?

|                                                | Never                 | Rarely                | Sometimes             | Often                 |
|------------------------------------------------|-----------------------|-----------------------|-----------------------|-----------------------|
| Personal communication with friends and family | <input type="radio"/> | <input type="radio"/> | <input type="radio"/> | <input type="radio"/> |
| Sharing educational information or resources   | <input type="radio"/> | <input type="radio"/> | <input type="radio"/> | <input type="radio"/> |
| Planning or learning about upcoming events     | <input type="radio"/> | <input type="radio"/> | <input type="radio"/> | <input type="radio"/> |
| Surfing for entertainment                      | <input type="radio"/> | <input type="radio"/> | <input type="radio"/> | <input type="radio"/> |
| Playing online games                           | <input type="radio"/> | <input type="radio"/> | <input type="radio"/> | <input type="radio"/> |
| Raising awareness/ fundraising                 | <input type="radio"/> | <input type="radio"/> | <input type="radio"/> | <input type="radio"/> |

Any other main uses:

## 13. Consider any contact you have with peers or colleagues who are AT OTHER UNIVERSITIES through Facebook. Which of the following statements BEST describes the nature of that communication?

- It is entirely personal/social
- It is mostly personal/social. Sometimes we will compare parts of our programs, or discuss what we are currently learning, but it is rare.
- In addition to some personal/social communication, I frequently use it to do things such as: share links to good academic resources, discuss research findings, obtain input on my current academic assignments/endeavors, etc.

# Facebook in Healthcare Education

## Section III: Privacy Settings

### 14. Have you ever altered your personal privacy settings?

- Yes
- No

### 15. Which of the following played a role in your decision to change your personal privacy settings? (Choose all that apply):

- Protecting your personal information from strangers
- Risk of your account being viewed by an admissions committee or potential employers
- Served in a position where you were viewed as a role model (eg. Residence assistant, preceptor, volunteering with a youth mentorship program, etc.)
- Advice from peers
- Recommendation from an instructor, tutor, professor or mentor
- Not trusting Facebook's use of posted information

Other (please specify)

## Section IV: Facebook in Education and Health

### 16. Findings from research suggest that people have differing opinions on issues surrounding Facebook and its use within education, healthcare, and personal contexts. Given this finding, which of the following would you say plays the LARGEST role in creating these differing views?

- Profession (including being in training for a specific profession)
- Country of origin
- Age
- Personality type (introvert or extrovert)
- Sex

Other (please specify)



## Facebook in Healthcare Education

### 17. To what extent do you agree/disagree with the following statements about the use of Facebook in education?

|                                                                                                                                                                     | Strongly Disagree     | Disagree              | Agree                 | Strongly Agree        |
|---------------------------------------------------------------------------------------------------------------------------------------------------------------------|-----------------------|-----------------------|-----------------------|-----------------------|
| I think that Facebook is useful in education                                                                                                                        | <input type="radio"/> | <input type="radio"/> | <input type="radio"/> | <input type="radio"/> |
| Our university should try harder to incorporate Facebook into all its courses                                                                                       | <input type="radio"/> | <input type="radio"/> | <input type="radio"/> | <input type="radio"/> |
| Facebook has some features that could be useful in education, but I am unsure how well it would work                                                                | <input type="radio"/> | <input type="radio"/> | <input type="radio"/> | <input type="radio"/> |
| I enjoy using Facebook for its personal and social benefits, but I try to avoid dealing with school or work-related content while using it. They should be separate | <input type="radio"/> | <input type="radio"/> | <input type="radio"/> | <input type="radio"/> |
| There is no need to incorporate Facebook in education. I believe our current online systems are more than adequate                                                  | <input type="radio"/> | <input type="radio"/> | <input type="radio"/> | <input type="radio"/> |

### 18. To what extent do you agree/disagree with the following statements about the potential use of Facebook in healthcare?

|                                                                                                                                          | Strongly Disagree     | Disagree              | Agree                 | Strongly Agree        |
|------------------------------------------------------------------------------------------------------------------------------------------|-----------------------|-----------------------|-----------------------|-----------------------|
| Facebook would be useful for online consultations                                                                                        | <input type="radio"/> | <input type="radio"/> | <input type="radio"/> | <input type="radio"/> |
| Facebook would be useful for scheduling of appointments                                                                                  | <input type="radio"/> | <input type="radio"/> | <input type="radio"/> | <input type="radio"/> |
| Facebook would be useful for filling prescriptions                                                                                       | <input type="radio"/> | <input type="radio"/> | <input type="radio"/> | <input type="radio"/> |
| Facebook would be useful to provide forums being mediated by healthcare professionals to answer questions                                | <input type="radio"/> | <input type="radio"/> | <input type="radio"/> | <input type="radio"/> |
| Facebook would be useful to provide opportunities for patients/clients with similar illnesses or conditions to connect for support, etc. | <input type="radio"/> | <input type="radio"/> | <input type="radio"/> | <input type="radio"/> |

## Section V: Online Professionalism

### 19. To what extent do you agree/disagree with the following statements about professionalism in the healthcare field?

|                                                                                                                                    | Strongly Disagree     | Disagree              | Agree                 | Strongly Agree        |
|------------------------------------------------------------------------------------------------------------------------------------|-----------------------|-----------------------|-----------------------|-----------------------|
| I have a good understanding of what professionalism is, and what is expected of me as a current or future professional             | <input type="radio"/> | <input type="radio"/> | <input type="radio"/> | <input type="radio"/> |
| I fully agree with the expectations of professionalism, and consciously strive to abide by them in all areas of my life            | <input type="radio"/> | <input type="radio"/> | <input type="radio"/> | <input type="radio"/> |
| A high level of professionalism should be expected of healthcare students from the very beginning of their time as a student       | <input type="radio"/> | <input type="radio"/> | <input type="radio"/> | <input type="radio"/> |
| There should be some leniency in regards to small incidents of unprofessional conduct in the early years of a professional program | <input type="radio"/> | <input type="radio"/> | <input type="radio"/> | <input type="radio"/> |

## Facebook in Healthcare Education

**20. Current literature suggests that professionalism may be dependent on context or the environment. In which of the following environments do you believe it is reasonable to expect healthcare students to act professionally AT ALL TIMES?**

**(Check all that apply)**

- At the University (eg. In lecture halls, tutorial rooms)
- In the clinic/workplace/hospital
- During free time spent in view of the public

If you left any of the above choices unchecked, please explain why:

**21. To what extent do you agree/disagree with the following statements about standards of professionalism relating to online activity?**

|                                                                                                                               | Strongly Disagree     | Disagree              | Agree                 | Strongly Agree        |
|-------------------------------------------------------------------------------------------------------------------------------|-----------------------|-----------------------|-----------------------|-----------------------|
| Professionalism is as important in online activity as it is in traditional environments                                       | <input type="radio"/> | <input type="radio"/> | <input type="radio"/> | <input type="radio"/> |
| It is not always entirely possible to maintain professionalism in online activity                                             | <input type="radio"/> | <input type="radio"/> | <input type="radio"/> | <input type="radio"/> |
| People have the opportunity to post pictures and document aspects of professionals' lives that would otherwise remain private | <input type="radio"/> | <input type="radio"/> | <input type="radio"/> | <input type="radio"/> |
| Social media has removed protection for professionals from the public                                                         | <input type="radio"/> | <input type="radio"/> | <input type="radio"/> | <input type="radio"/> |
| Professionals are never free to let their guard down                                                                          | <input type="radio"/> | <input type="radio"/> | <input type="radio"/> | <input type="radio"/> |
| The risks of social networking software far outweigh the benefits and its use by health professionals should be DISCOURAGED   | <input type="radio"/> | <input type="radio"/> | <input type="radio"/> | <input type="radio"/> |
| The risks of social networking software far outweigh the benefits and its use by health professionals should be BANNED        | <input type="radio"/> | <input type="radio"/> | <input type="radio"/> | <input type="radio"/> |
| I don't think my online activity has a bearing on who I am as a professional                                                  | <input type="radio"/> | <input type="radio"/> | <input type="radio"/> | <input type="radio"/> |
| I should be able to do whatever I want online                                                                                 | <input type="radio"/> | <input type="radio"/> | <input type="radio"/> | <input type="radio"/> |
| The university has no business interfering in my online activity                                                              | <input type="radio"/> | <input type="radio"/> | <input type="radio"/> | <input type="radio"/> |

## Facebook in Healthcare Education

**22. Consider the following list of possible negative outcomes resulting from unprofessional behaviour online. Please rank the items in the list from those you would personally find most concerning (1), to least concerning (5).**

Rank (1-5) (Choose each number only once)

People having the opportunity to make inaccurate judgments about you solely based on posted content

The possibility that your behavior could affect the image of others in your profession

Not being hired by an employer or being accepted to a program because of information discovered about you online

The possibility of losing a position you already have (as an employee or student) because of information discovered about you online

Having privileged information about a patient/client distributed online without their consent

**23. Do you believe the debate about online professionalism is more important or less important to other professions than your own?**

- I believe this issue is more important for my faculty in particular, compared with some other health professions
- I believe this issue is equally important across all health professions faculties
- I believe this issue is more relevant in certain other health faculties than my own

(please explain, or name those faculties):

## Online Professionalism contd.

## Facebook in Healthcare Education

### 24. Which of the following types of material (if posted on Facebook) would you consider to be unprofessional? (Choose all that apply):

- A picture of an individual having one alcoholic beverage
- Pictures of an individual clearly acting drunk
- Status updates describing substantial alcohol consumption at a party
- Posts depicting illicit drug consumption
- Posts that disclose information about a patient/client
- Photos of a patient/client
- Posts describing an interaction with a patient/client, that do not reveal any identifying information
- Swearing or foul language
- Obscene gestures in photos (middle finger, etc)
- Petty criminal activity
- Endorsements of a pharmaceutical or health product without a conflict of interest disclosure
- Posts involving overt sexual content
- Posts containing partial nudity
- Displaying your current relationship status
- Displaying membership in online groups dealing with controversial issues
- Making opinionated comments about controversial issues
- Critical comments about a lecturer or preceptor
- Critical comments of course material, your program, faculty, or the university
- Attitudes of superiority or condescending behaviour (assumed because of professional status)

Other examples of unprofessionalism online (please specify)

### 25. Do you think that others would benefit from guidelines relating to using social networking software in a professional manner?

- Yes
- No

## Facebook in Healthcare Education

1  
2  
3  
4  
5  
6  
7  
8  
9  
10  
11  
12  
13  
14  
15  
16  
17  
18  
19  
20  
21  
22  
23  
24  
25  
26  
27  
28  
29  
30  
31  
32  
33  
34  
35  
36  
37  
38  
39  
40  
41  
42  
43  
44  
45  
46  
47  
48  
49  
50  
51  
52  
53  
54  
55  
56  
57  
58  
59  
60

**26. Are you aware of another a colleague posting material on Facebook, which you considered unprofessional?**

Yes

No

If yes, please describe:

**27. Have you yourself ever made any posts or comments on social media websites that, in hindsight, you probably shouldn't have?**

Yes

No

If yes, please describe:

**28. Has anyone else ever posted material about you online which you found embarrassing or which made you look unprofessional?**

Yes

No

If yes, please describe:

**29. How would you describe your typical actions or behavior in an online social media environment, given the following definitions?**

**-Active behavior: making comments, posting links or photos, sending invites**

**-Passive behavior: reading, observing, having pictures of you or other content relating to you posted by others**

More active than passive

More passive than active

About half active, and half passive

I do not have an account on a social media website

## Facebook in Healthcare Education

**30. In light of your response to the previous question, which do you think is a better strategy for protecting your online image?**

- Abstaining from Facebook completely and not having an account at all
- Maintaining an account, so you can monitor posts that might involve you (pictures, etc.)

**31. Do you think that you could benefit from guidelines relating to using social networking software in a professional manner?**

- Yes
- No

**32. Do you think that current guidelines at the University adequately address and define issues relating to Facebook and online professionalism for those that might be unsure?**

- Yes, they are fine
- No, they should be amended to specifically address issues of online activity
- I am unfamiliar with current guidelines for professionalism and conduct
- There is no need for the University to issue guidelines on my online activity

**33. Please take a moment and include any comments you might have about Facebook use by current and future healthcare professionals, your feelings about online professionalism (ways to improve it, or if it should be considered an issue at all), or any other thoughts that this survey might have provoked:**
